# Supplementary material for: Spatio-Temporal Metabolite Profiling of the Barley Germination Process by MALDI MS Imaging
Source: PLoS One. 2016 Mar 3;11(3):e0150208. doi: 10.1371/journal.pone.0150208 (PMC4777520; doi:10.1371/journal.pone.0150208)
Supplement: S1 Table — A) FT-ICR and MALDI-TOF based identification of compounds. B) Peak list of the average mass spectrum from MALDI-FT-ICR MS Imaging of a barley seed section. C) Metlin database search results of the 100 highest peaks in the average mass spectrum of FT-ICR MS Imaging of barley. (XLSX) [file pone.0150208.s012.xlsx]

## Sheet: S1 Table A
m/z FT-ICR data	adduct	ppm mismatch	Metabolite ID from Metlin	Molecular formula	Molecular weight	MS/MS	Conclusion / Annotation
277.166	[M+H]+	0	p-Coumaroylagmatine	C14H20N4O2	276.159	HCAA	Coumaroylagmatine
293.161	[M+Na]+	5	doxylamine	C17H22N2O	270.173	HCAA	Coumaroylhydroxyagmatine
307.176	[M+H]+	0	Feruloylagmatine	C15H22N4O3	306.169	HCAA	Feruloylagmatine
323.171	[M+Na]+	7	Pro Gly Lys	C13H24N4O4	300.18	HCAA	Feruloylhydroxyagmatine
381.079	[M+K]+	0	2 hexoses ([M+K]+)	C12H22O11	342.116	Unclear MS/MS	2 hexoses [M+K]+
496.339	[M+H]+	2	PC(16:0/0:0)	C24H50NO7P	495.332	PC	PC(16:0) [M+H]+
518.321	[M+H]+	5	PC(18:3/0:0)	C26H48NO7P	517.317	Unclear MS/MS
	[M+Na]+	0	PC(16:0/0:0)	C24H50NO7P	495.332
	[M+Na]+	0	PE(19:0/0:0)	C24H50NO7P	495.332
520.34	[M+H]+	0	PC(18:2/0:0)	C26H50NO7P	519.332	PC	PC(18:2) [M+H]+
527.158	[M+Na]+	0	3 hexoses ([M+Na] +)	C18H32O16	504.169	Hexose residues	3 hexoses [M+Na]+
534.089	[M+H]+	1	CDP-3,6-dideoxy-D-[hexose]	C15H25N3O14P2	533.081	Unclear MS/MS
	[M+K]+	0	PC(16:0/0:0)	C24H50NO7P	495.332
	[M+K]+	0	PE(19:0/0:0)	C24H50NO7P	495.332
543.132	[M+K]+	0	3 hexoses ([M+K] +)	C18H32O16	504.169	Hexose residues	3 hexoses [M+K]+
551.309	[M+H]+	0	Hordatine A	C28H38N8O4	550.302	Hordatine A	Hordatine A [M+H]+
581.32	[M+H]+	0	Hordatine B	C29H40N8O5	580.312	Hordatine B	Hordatine B [M+H]+
611.33	[M+K]+	7	Vitamin D2 3-glucuronide	C34H52O7	572.371	Hordatine like structure	Hordatine C [M+H]+
689.211	[M+Na]+	0	4 hexoses ([M+Na] +)	C18H32O16	666.222	Hexose residues	4 hexoses [M+Na]+
699.174	[M+H]+	3	Malvidin 3-glucoside-5-(6-acetylglucoside)	C30H34O19	698.169
705.185	[M+K]+	0	4 hexoses ([M+K] +)	C18H32O16	666.222	Hexose residues	4 hexoses [M+K]+
713.361	[M+Na]+	8	Gabunine	C42H50N4O5	690.378	Hordatine like structure	Hordatine A + Hex [M+H]+
735.436	[M+K]+	0	PA(36:4)	C39H69O8P	696.473	Hordatine like structure	Hordatine A + Hex [M+Na]+
743.375	[M+K]+	2	cimicifoetiside B	C39H60O11	704.414	Hordatine like structure	Hordatine B + Hex [M+H]+
756.553	[M+H]+	1	PC(34:3)*	C42H78NO8P	755.547	Low precursor intensity
	[M+H]+	1	PE(37:3)	C42H78NO8P	755.547
	[M+Na]+	1	PE(35:0)*	C40H80NO8P	733.562
	[M+Na]+	1	PE-NMe(17:0/17:0)	C40H80NO8P	733.562
	[M+Na]+	1	PC(32:0)*	C40H80NO8P	733.562
758.569	[M+H]+	0	PE-NMe(36:2)	C42H80NO8P	757.562	PC	PC(34:2) [M+H]+
	[M+H]+	0	PC(34:2)*	C42H80NO8P	757.562
	[M+H]+	0	PE(37:2)*	C42H80NO8P	757.562
780.553	[M+H]+	1	PC(36:5)*	C44H78NO8P	779.547	PC	PC(36:5) [M+H]+
	[M+H]+	1	PE(39:5)*	C44H78NO8P	779.547
	[M+Na]+	2	PE-NMe(36:2)	C42H80NO8P	757.562
	[M+Na]+	2	PC(34:2)*	C42H80NO8P	757.562
	[M+Na]+	2	PE(37:2)*	C42H80NO8P	757.562
782.569	[M+H]+	1	PC(36:4)*	C44H80NO8P	781.562	PC	PC(36:4) [M+Na]+
	[M+H]+	1	PE(39:4)*	C44H80NO8P	781.562		and / or
	[M+Na]+	2	PC(34:1)*	C42H82NO8P	759.578
	[M+Na]+	2	PE(37:1)*	C42H82NO8P	759.578		PC(34:1) [M+Na]+
796.524	[M+H]+	0	C16-OH Sulfatide	C40H77NO12S	795.517	Low precursor intensity
	[M+Na]+	1	PE(22:6/18:1)	C45H76NO7P	773.536
	[M+K]+	1	PE-NMe(18:1/18:1)	C42H80NO8P	757.562
	[M+K]+	1	PC(34:2)*	C42H80NO8P	757.562
	[M+K]+	1	PE(37:2)	C42H80NO8P	757.562
804.551	[M+H]+	3	PC(38:7)*	C46H78NO8P	803.547	Low precursor intensity
	[M+H]+	3	PE(19:1/22:6)	C46H78NO8P	803.547
	[M+Na]+	0	PC(36:4)*	C44H80NO8P	781.562
	[M+Na]+	0	PE(39:4)*	C44H80NO8P	781.562
820.525	[M+K]+	0	PC(36:4)*	C44H80NO8P	781.562	Low precursor intensity
	[M+K]+	0	PE(39:4)*	C44H80NO8P	781.562
851.264	[M+Na]+	0	5 hexoses ([M+Na] +)	C30H52O26	828.275	Hexose residues	5 hexoses [M+Na]+
867.238	[M+K]+	0	5 hexoses ([M+K] +)	C30H52O26	828.275	Hexose residues	5 hexoses [M+K]+
897.73	[M+K]+	0	TG(52:2)*	C55H102O6	858.768	Hordatine like structure	Hordatine A + 2 Hex [M+Na]+
921.732	[M+K]+	1	TG(54:4)*	C57H102O6	882.768	Low precursor intensity
955.573	[M+K]+	6	PI(40:3)*	C49H89O13P	916.604
963.601	[M+H]+	5	PI(44:8)*	C49H89O13P	962.588
979.574	[M+K]+	7	PI(42:5)*	C51H89O13P	940.604
1013.31	[M+Na]+	2	6 hexoses ([M+Na] +)	C36H62O31	990.328	Hexose residues	6 hexoses [M+Na]+
1067.48	[M+Na]+	7	Aeruginopeptin 228A	C52H68N8O15	1044.48
1175.37	[M+Na]+	0	7 hexoses ([M+Na] +)	C42H72O36	1152.38	Hexose residues	7 hexoses [M+Na]+
1191.34	[M+K]+	0	7 hexoses ([M+K] +)	C42H72O36	1152.38	Hexose residues	7 hexoses [M+K]+
1677.51	[M+K]+	1	1,4-b-D-Mannan	C60H102O51	1638.54		10 hexoses [M+K]+

## Sheet: S1 Table B
sorted by m/z			sorted by intensity
m/z	intensity		intensity	m/z	Database hit
204.528	3.98187		1070.53	743.375	x		100 highest peaks: See S2 Table C for search results
216.088	5.08852		782.067	713.364	x		Search settings:
229.05	7.70161		700.918	273.039	x		positive mode
229.063	6.39388		496.892	543.133	x		search for [M+H]+ ; [M+Na]+ ; [M+K]+
229.064	7.58636		442.29	1853.36	x		Accuracy: 10 ppm
232.083	3.36975		441.928	705.186	x		include peptides
235.062	5.36048		347.244	381.079	x
235.066	3.79482		324.14	773.386			Search results:
235.067	4.62404		304.624	365.105	x		2319 hits for 66 m/z (of 100 highest m/z)
235.067	6.5416		295.258	773.167
235.069	3.06849		283.899	527.158	x
237.787	17.446		265.844	867.24	x
237.788	5.66804		257.445	689.211	x
237.791	14.4368		246.497	478.329	x
237.792	11.77		238.238	687.176	x
237.793	40.4031		238.15	371.686
237.794	13.7993		237.399	758.57	x
237.795	5.09914		221.102	893.703	x
238.128	11.3764		194.435	752.276	x
238.128	4.23024		186.822	525.122	x
239.165	72.1327		185.229	356.681
239.666	4.86497		179.236	746.692
241.493	3.14826		167.226	502.329	x
245.044	6.95736		166.941	1679.65
245.826	5.57159		166.599	849.23	x
247.633	3.38552		158.519	905.43
247.791	27.715		149.3	1733.82
247.792	9.23148		147.419	574.927
247.795	15.4392		143.661	851.265	x
247.796	19.4073		143.561	935.439	x
247.797	65.9637		136.505	271.566
247.798	27.7945		135.84	551.309	x
247.799	18.8362		134.186	1096.92
248.125	3.08997		118.399	679.383	x
248.126	3.03982		109.526	352.592
248.131	4.123		108.363	726.347
248.132	21.483		106.783	1029.29	x
248.132	9.93576		105.435	576.922
248.134	6.99825		104.587	782.57	x
248.17	4.13471		102.853	363.069	x
250.013	3.89211		100.229	917.703	x
250.498	4.7694		97.4963	696.336	x
251.165	35.1471		96.217	671.201	x
252.856	5.58808		94.9325	663.409	x
252.861	3.76773		93.9364	701.964
254.574	3.67606		92.2272	509.148	x
255.029	18.6533		90.9198	347.095	x
257.044	4.56757		82.4084	736.463	x
257.794	4.67594		79.9735	581.32	x
257.799	3.18845		79.3778	869.703	x
257.804	19.744		78.515	895.718	x
258.138	7.20327		76.661	745.384	x
258.548	4.8053		76.0852	796.526	x
258.628	7.97182		75.7764	386.691
262.561	32.7115		75.1802	679.148	x
263.579	61.5126		73.2181	737.454	x
267.141	9.39731		72.1327	239.165	x
271.566	136.505		70.3602	379.285	x
272.068	7.2544		70.2009	372.188	x
272.536	4.99237		70.1141	371.688
273.039	700.918		65.9637	247.797
273.135	4.43278		65.3253	363.972	x
275.15	11.1204		64.9722	731.453
275.654	35.3861		64.4003	364.98
276.156	5.12943		64.0409	613.251	x
277.166	40.1563		63.6581	877.729	x
281.066	6.89523		62.6906	1011.28	x
283.084	8.67606		62.6345	575.504	x
287.463	36.0796		61.7063	780.552	x
287.506	9.87116		61.5126	263.579
287.752	8.22996		59.1384	699.145	x
288.461	23.2814		58.9508	597.486
289.088	5.28731		58.304	747.198
289.09	5.38538		56.3256	833.254
290.66	12.9219		55.6245	1224.24
292.571	3.80562		55.0639	1013.32	x
292.587	3.79511		54.23	331.081	x
293.161	18.9655		51.9582	702.066	x
297.24	3.36935		51.5571	919.72	x
297.9	4.18824		50.7604	891.688	x
297.907	8.56049		50.2826	344.605
297.912	10.5565		49.3712	813.295	x
298.108	4.91602		48.0737	495.266	x
298.247	5.79687		48.0464	721.969
298.583	7.5835		47.8981	357.182	x
298.743	5.21713		47.5783	831.035
298.918	3.59041		46.8332	1198.82
299.076	9.57861		46.7783	575.012	x
301.819	5.70687		45.8183	612.613
301.821	4.7101		45.4214	663.175	x
302.01	36.8809		45.0175	841.202	x
305.912	4.79064		44.9677	879.393
306.279	12.9584		44.872	409.056	x
306.585	5.173		44.0937	741.542	x
306.625	10.3766		44.0397	831.22
307.176	3.29926		43.5984	356.682
310.743	3.56043		43.5524	517.096	x
311.825	8.0941		42.7186	909.253
313.032	28.028		42.5467	585.143	x
318.506	4.16256		42.3931	799.295	x
318.975	9.88333		42.0603	534.283
319.983	3.40836		40.6437	731.796
320.99	25.8471		40.4031	237.793
321.63	3.9873		40.1698	660.773
322.986	5.57034		40.1563	277.166
327.078	31.2586		39.0367	634.038
327.989	19.3574		38.8179	626.647
328.959	7.27418		38.3312	715.373
328.997	3.50527		37.7466	1112.04
329.006	4.53514		36.9008	343.587
330.005	6.77808		36.8809	302.01
331.081	54.23		36.6235	1378.17
331.704	16.3363		36.2991	812.583
335.014	26.9193		36.0796	287.463
335.6	5.3149		35.9109	599.504
339.574	7.63959		35.4195	685.436
339.691	15.4193		35.417	896.723
343.587	36.9008		35.3861	275.654
343.589	12.049		35.1471	251.165
344.605	50.2826		34.7447	500.997
346	24.274		34.6806	756.554
346.97	7.24022		34.6741	539.298
347.007	3.85725		34.4984	915.69
347.095	90.9198		34.4655	703.403
348.168	19.3593		34.2014	535.325
350.988	3.71535		34.1315	501.122
352.592	109.526		34.0016	643.261
353.094	8.41275		33.9235	756.357
356.681	185.229		33.489	621.486
356.682	43.5984		33.4625	760.582
356.684	5.1652		33.4552	1191.35
356.686	3.32314		33.3526	849.381
356.688	8.44724		33.1274	773.404
357.182	47.8981		32.7115	262.561
357.184	13.419		32.6238	761.454
363.069	102.853		32.3602	517.256
363.173	20.731		31.9274	820.526
363.972	65.3253		31.3082	807.468
364.072	4.5744		31.2586	327.078
364.954	4.54111		31.1883	521.309
364.976	3.16459		31.1052	637.014
364.98	64.4003		30.6957	795.468
365.105	304.624		30.5045	819.495
365.108	3.00984		30.3482	773.03
365.968	19.5111		30.3094	769.284
365.984	3.84571		29.9058	701.351
366.109	11.2165		29.7772	1159.16
366.962	25.435		29.7504	669.165
366.976	20.2044		28.9652	627.154
368.726	7.36205		28.7596	875.419
368.73	4.10588		28.5345	545.072
371.163	4.19488		28.2968	935.553
371.676	4.5336		28.028	313.032
371.681	4.17798		27.9769	645.165
371.686	238.15		27.9014	703.719
371.688	70.1141		27.8355	979.577
371.691	5.01486		27.7945	247.798
371.693	5.7651		27.7272	671.341
371.694	13.8949		27.715	247.791
371.697	3.17262		27.167	699.173
371.7	3.04111		27.1517	551.297
372.188	70.2009		26.9981	523.324
372.189	23.9647		26.9193	335.014
372.192	5.88398		26.4027	891.241
372.196	4.87979		26.392	667.383
373.006	3.09037		26.1479	1090.26
373.598	5.13815		25.9924	611.331
373.599	3.46295		25.8471	320.99
377.509	4.575		25.7846	879.747
378.178	3.72674		25.697	482.986
378.277	4.84889		25.695	564.293
379.285	70.3602		25.5551	784.584
379.786	23.0227		25.435	366.962
381.079	347.244		25.2675	702.475
383.078	9.52389		24.8711	661.138
385.21	10.0547		24.8633	537.283
385.954	5.7696		24.7106	625.652
386.691	75.7764		24.274	346
386.696	14.4547		24.2662	391.285
386.704	3.23878		24.2626	779.492
386.962	19.3302		24.2328	751.549
387.193	18.2176		24.0402	701.411
387.198	5.26574		23.9647	372.189
388.958	5.20636		23.8973	919.579
391.017	10.5677		23.8445	775.301
391.285	24.2662		23.7573	921.737
391.786	5.2254		23.6689	832.18
398.263	8.20439		23.5674	853.729
399.071	4.81366		23.5049	660.494
403.111	6.35669		23.4099	735.441
407.241	14.8952		23.4035	783.352
408.944	5.14107		23.3265	789.209
409.056	44.872		23.2814	288.461
421.056	8.00711		23.2217	791.493
421.187	8.34792		23.1234	766.937
423.215	4.1691		23.0227	379.786
424.615	7.83737		22.9091	1534.5
425.632	4.12508		22.8535	1053.91
433.619	14.3149		22.5637	786.87
434.85	3.45895		22.4883	567.133
435.091	4.61478		22.3641	662.61
439.066	7.19392		22.3456	692.933
446.85	14.3213		21.9541	825.227
447.352	6.78515		21.9252	583.24
447.859	3.23595		21.8696	729.922
449.048	21.4707		21.7265	759.198
451.198	12.3045		21.483	248.132
452.714	7.59255		21.4707	449.048
453.101	4.10499		21.3803	784.45
458.29	12.0997		21.0546	781.331
458.851	5.37705		20.8761	766.864
464.005	10.4458		20.7784	709.32
465.013	14.2512		20.731	363.173
465.023	7.46192		20.7273	545.132
465.101	3.70036		20.7185	755.02
467.718	7.73563		20.6383	765.357
475.234	3.96833		20.5536	955.577
478.329	246.497		20.5518	807.219
479.262	18.507		20.3861	901.728
481.208	6.26145		20.3788	775.395
482.016	6.63938		20.2662	995.306
482.986	25.697		20.2044	366.976
483.024	6.66983		20.1608	707.714
483.111	12.0522		19.9728	751.32
484.982	7.61203		19.9518	679.309
495.112	18.3677		19.819	768.859
495.236	16.9635		19.7513	1003.26
495.266	48.0737		19.7463	743.497
496.34	19.5883		19.744	257.804
499.076	7.20355		19.7213	777.687
499.086	10.6312		19.5883	496.34
499.989	14.7135		19.5111	365.968
500.026	16.753		19.4352	665.17
500.314	6.08495		19.4073	247.796
500.97	4.73933		19.3593	348.168
500.997	34.7447		19.3574	327.989
501.034	14.7659		19.3302	386.962
501.122	34.1315		19.2084	651.409
501.984	3.8016		18.9655	293.161
502.329	167.226		18.8951	700.729
502.992	10.9993		18.8362	247.799
504.345	10.8124		18.7327	641.341
504.968	7.67064		18.6814	793.452
506.361	6.36201		18.6533	255.029
507.112	12.4782		18.507	479.262
509.148	92.2272		18.4476	657.165
509.287	17.9277		18.4327	729.187
510.151	5.59467		18.3677	495.112
512.926	14.8818		18.2783	784.874
513.122	4.65622		18.2176	387.193
514.922	11.9936		17.9277	509.287
517.085	13.834		17.9179	707.186
517.096	43.5524		17.446	237.787
517.256	32.3602		17.3305	963.264
518.099	4.33337		17.3235	1173.34
518.322	4.42302		17.2813	777.342
520.34	12.857		17.1634	689.864
521.309	31.1883		16.9635	495.236
522.979	8.93499		16.8588	777.478
523.107	3.5259		16.768	775.18
523.324	26.9981		16.753	500.026
525.122	186.822		16.6957	830.948
527.121	5.84682		16.6139	665.367
527.158	283.899		16.5753	742.342
534.09	3.08589		16.5007	735.347
534.283	42.0603		16.3754	1071.31
534.296	6.3891		16.3363	331.704
535.059	6.68653		16.3033	698.832
535.097	12.1772		16.1948	1175.37
535.325	34.2014		16.1673	632.842
537.283	24.8633		16.0624	752.145
539.022	4.66636		16.0303	897.734
539.298	34.6741		15.8568	823.193
541.117	4.51006		15.7402	710.944
543.133	496.892		15.6223	632.356
544.961	9.83376		15.6057	694.929
545.072	28.5345		15.4392	247.795
545.132	20.7273		15.4193	339.691
547.267	13.0203		15.3919	702.357
549.123	4.83764		15.218	595.471
549.34	10.4064		15.1365	650.645
551.159	5.07976		14.8952	407.241
551.297	27.1517		14.8818	512.926
551.309	135.84		14.8681	722.303
551.356	8.66256		14.7659	501.034
551.504	13.0589		14.7135	499.989
553.07	10.7788		14.7121	756.151
553.321	3.69066		14.6133	619.003
556.916	12.6323		14.5682	897.403
557.261	5.52029		14.4624	577.008
558.912	9.86344		14.4547	386.696
564.293	25.695		14.4368	237.791
565.315	8.71166		14.4193	578.919
566.943	4.16704		14.3213	446.85
567.133	22.4883		14.3149	433.619
567.33	6.82684		14.2512	465.013
569.17	9.24253		14.1677	585.065
572.541	5.14625		14.1287	1343.72
573.292	3.36839		14.0263	871.714
573.488	6.8655		13.9617	993.275
573.919	9.65229		13.9607	715.025
574.005	4.38477		13.9463	872.215
574.927	147.419		13.8949	371.694
575.012	46.7783		13.834	517.085
575.504	62.6345		13.7993	237.794
575.915	6.6486		13.7565	587.272
576.922	105.435		13.7453	963.603
577.008	14.4624		13.7225	872.704
577.519	10.308		13.6552	813.21
578.899	5.68627		13.419	357.184
578.919	14.4193		13.2722	649.393
580.894	3.29195		13.2542	721.48
581.32	79.9735		13.2203	702.413
583.129	3.33317		13.2174	751.913
583.24	21.9252		13.2017	648.63
585.065	14.1677		13.1065	721.275
585.143	42.5467		13.0757	1310.96
585.256	4.33243		13.0589	551.504
587.272	13.7565		13.0203	547.267
589.266	8.96283		12.9584	306.279
592.309	4.93558		12.9219	290.66
594.304	8.81124		12.857	520.34
595.471	15.218		12.8393	828.95
596.909	5.53773		12.7353	630.846
597.144	6.24524		12.6465	1014.32
597.486	58.9508		12.6457	804.552
598.905	4.12767		12.6323	556.916
598.962	12.1825		12.4782	507.112
599.16	5.13679		12.4259	693.399
599.504	35.9109		12.4157	717.187
600.881	3.55274		12.3574	702.377
601.031	9.69586		12.3113	780.497
601.519	6.99907		12.3045	451.198
607.229	5.17278		12.2187	873.232
607.391	3.55176		12.1825	598.962
609.144	8.80841		12.1772	535.097
609.38	10.2166		12.0997	458.29
611.181	5.12612		12.0893	672.205
611.331	25.9924		12.0522	483.111
612.334	3.7392		12.049	343.589
612.613	45.8183		12.0319	951.264
613.251	64.0409		11.9936	514.922
613.346	5.10984		11.9729	935.467
615.154	6.5058		11.8953	869.243
615.266	3.31548		11.8203	893.73
616.177	5.79311		11.77	237.792
618.891	8.34742		11.7303	759.37
619.003	14.6133		11.6317	780.746
619.277	3.66137		11.5778	801.292
619.471	9.70068		11.518	875.714
620.886	6.91236		11.5105	746.561
620.998	4.86825		11.4532	701.652
621.486	33.489		11.4309	880.633
623.1	3.4773		11.3764	238.128
625.652	24.7106		11.3031	712.939
626.589	3.14224		11.2563	909.403
626.647	38.8179		11.2195	688.16
627.154	28.9652		11.2165	366.109
629.321	3.42033		11.1204	275.15
630.846	12.7353		11.0099	640.985
632.356	15.6223		10.9993	502.992
632.842	16.1673		10.8567	855.748
634.038	39.0367		10.8124	504.345
634.838	3.46641		10.7788	553.07
636.006	3.24301		10.7537	741.187
637.014	31.1052		10.706	761.215
637.032	4.37147		10.7059	903.746
637.048	5.09614		10.6715	677.424
637.138	5.68749		10.6697	847.215
637.241	3.12709		10.6523	735.468
637.539	3.57458		10.6312	499.086
639.009	8.05558		10.5677	391.017
639.154	7.61592		10.5636	750.55
640.873	4.93433		10.5565	297.912
640.985	11.0099		10.4991	801.209
641.192	8.07874		10.458	721.081
641.341	18.7327		10.4458	464.005
643.261	34.0016		10.4064	549.34
643.288	4.06001		10.3999	731.362
643.327	3.52567		10.3766	306.625
644.599	5.55906		10.308	577.519
645.165	27.9769		10.266	832.623
646.615	3.88785		10.2444	819.22
648.63	13.2017		10.2166	609.38
649.393	13.2722		10.1638	969.272
650.645	15.1365		10.1544	685.771
651.155	5.88553		10.1485	708.034
651.207	4.62844		10.0589	844.802
651.409	19.2084		10.0547	385.21
653.109	7.0061		9.99979	981.274
653.171	3.975		9.94982	815.234
653.192	4.67145		9.93576	248.132
656.356	6.49952		9.93069	1053.3
657.165	18.4476		9.89593	1353.4
660.494	23.5049		9.88333	318.975
660.655	3.30626		9.87116	287.506
660.773	40.1698		9.86344	558.912
661.138	24.8711		9.83376	544.961
662.142	3.31842		9.79297	680.977
662.246	4.47297		9.7448	746.392
662.329	3.1204		9.70068	619.471
662.61	22.3641		9.69586	601.031
663.175	45.4214		9.65229	573.919
663.409	94.9325		9.57861	299.076
663.454	4.91724		9.55141	796.282
664.178	4.74493		9.54944	805.315
664.625	8.67732		9.53149	1701.46
665.17	19.4352		9.52389	383.078
665.367	16.6139		9.49708	834.257
667.149	4.15594		9.48136	701.839
667.383	26.392		9.47449	771.198
669.165	29.7504		9.44192	685.161
670.299	3.59924		9.44031	939.603
671.114	4.58183		9.40195	894.586
671.181	6.98164		9.39731	267.141
671.201	96.217		9.37775	1791.6
671.341	27.7272		9.34874	1023.28
672.205	12.0893		9.3368	794.511
675.176	3.93009		9.24253	569.17
676.463	5.75146		9.23148	247.792
677.424	10.6715		9.18465	778.481
679.148	75.1802		9.16921	767.645
679.309	19.9518		9.16622	831.431
679.383	118.399		9.02712	842.206
679.44	6.72444		8.96283	589.266
680.977	9.79297		8.95243	921.253
681.089	4.59423		8.93499	522.979
681.122	4.39308		8.81124	594.304
681.165	6.45876		8.80841	609.144
681.386	3.4498		8.73292	987.278
683.181	4.68988		8.71166	565.315
683.202	5.07712		8.67732	664.625
685.161	9.44192		8.67606	283.084
685.436	35.4195		8.66451	756.476
685.771	10.1544		8.66256	551.356
687.176	238.238		8.65536	873.497
687.326	5.92899		8.5766	844.083
688.16	11.2195		8.56049	297.907
688.197	3.94836		8.47274	1268.56
689.086	3.37215		8.44724	356.688
689.211	257.445		8.41275	353.094
689.864	17.1634		8.34792	421.187
690.173	5.12833		8.34742	618.891
691.926	3.50456		8.33677	780.528
692.933	22.3456		8.25418	923.269
693.399	12.4259		8.22996	287.752
694.627	4.28557		8.21855	737.471
694.929	15.6057		8.2094	736.348
695.415	7.55629		8.20439	398.263
696.336	97.4963		8.11471	933.253
697.157	3.26162		8.0968	1033.65
698.832	16.3033		8.0941	311.825
699.099	3.88109		8.07874	641.192
699.145	59.1384		8.05558	639.009
699.173	27.167		8.03751	761.588
699.336	3.13123		8.00711	421.056
700.179	4.20086		7.97182	258.628
700.729	18.8951		7.94558	888.402
701.351	29.9058		7.93677	757.207
701.411	24.0402		7.93618	731.224
701.652	11.4532		7.83737	424.615
701.752	6.28893		7.81064	745.351
701.839	9.48136		7.73563	467.718
701.964	93.9364		7.72797	770.29
702.066	51.9582		7.71534	727.174
702.336	4.90455		7.7026	757.016
702.357	15.3919		7.70161	229.05
702.377	12.3574		7.67064	504.968
702.413	13.2203		7.66732	785.866
702.475	25.2675		7.65537	907.437
703.171	6.3701		7.63959	339.574
703.278	4.56601		7.62619	1097.49
703.403	34.4655		7.61592	639.154
703.719	27.9014		7.61203	484.982
705.186	441.928		7.60955	771.281
705.336	5.49088		7.59255	452.714
707.186	17.9179		7.58636	229.064
707.714	20.1608		7.5835	298.583
708.034	10.1485		7.55629	695.415
709.32	20.7784		7.51906	715.172
710.944	15.7402		7.46192	465.023
711.177	4.85796		7.3706	783.004
711.439	3.22553		7.36205	368.726
712.331	7.34659		7.35268	779.158
712.939	11.3031		7.34942	1626.54
713.193	4.58419		7.34659	712.331
713.214	5.25424		7.34077	985.248
713.302	3.11985		7.32048	851.233
713.364	782.067		7.27418	328.959
714.915	4.84235		7.2544	272.068
715.025	13.9607		7.24022	346.97
715.172	7.51906		7.22599	867.391
715.373	38.3312		7.20355	499.076
716.38	3.67517		7.20327	258.138
716.911	3.45148		7.19916	833.227
717.187	12.4157		7.19392	439.066
721.081	10.458		7.18182	786.6
721.157	4.04202		7.08943	788.867
721.275	13.1065		7.08549	904.877
721.48	13.2542		7.01809	778.539
721.969	48.0464		7.01079	975.552
722.303	14.8681		7.0061	653.109
723.29	5.07227		7.00186	862.365
723.377	5.17997		6.99907	601.519
725.133	3.18162		6.99825	248.134
725.193	3.09639		6.98164	671.181
725.364	3.36468		6.95736	245.044
725.541	5.25713		6.94333	861.231
726.347	108.363		6.91236	620.886
727.174	7.71534		6.89523	281.066
728.358	4.69419		6.87669	754.485
729.187	18.4327		6.8655	573.488
729.359	5.55654		6.82684	567.33
729.922	21.8696		6.79508	923.752
731.224	7.93618		6.78581	909.698
731.322	3.4397		6.78515	447.352
731.362	10.3999		6.78421	750.236
731.407	5.11332		6.77808	330.005
731.453	64.9722		6.74727	834.191
731.713	5.75302		6.72893	759.441
731.796	40.6437		6.72444	679.44
733.424	3.63881		6.68653	535.059
734.569	3.49011		6.66983	483.024
734.852	3.17739		6.65916	903.243
735.347	16.5007		6.65812	898.741
735.441	23.4099		6.6486	575.915
735.468	10.6523		6.64233	923.554
736.348	8.2094		6.63938	482.016
736.416	5.36511		6.61743	1113.32
736.463	82.4084		6.60614	1602.31
737.009	5.71395		6.57247	877.754
737.454	73.2181		6.56847	1005.28
737.471	8.21855		6.55201	813.498
739.33	4.93542		6.5416	235.067
740.53	3.03481		6.5058	615.154
741.187	10.7537		6.49952	656.356
741.542	44.0937		6.49256	1155.33
742.342	16.5753		6.49196	945.254
743.144	4.36869		6.47126	1122.86
743.202	6.23193		6.45876	681.165
743.227	4.28691		6.44605	1095.31
743.375	1070.53		6.4134	867.687
743.497	19.7463		6.39388	229.063
743.591	3.80076		6.3891	534.296
744.332	4.65238		6.3701	703.171
745.183	5.66338		6.36201	506.361
745.351	7.81064		6.35669	403.111
745.384	76.661		6.28893	701.752
745.48	4.4573		6.28676	829.204
746.392	9.7448		6.26308	777.209
746.561	11.5105		6.26145	481.208
746.692	179.236		6.26044	899.715
747.198	58.304		6.24524	597.144
749.395	3.33275		6.23193	743.202
750.236	6.78421		6.22492	783.201
750.51	3.55326		6.19606	918.411
750.55	10.5636		6.19561	877.227
750.935	3.28184		6.14817	927.415
751.32	19.9728		6.14074	808.852
751.549	24.2328		6.12678	812.962
751.913	13.2174		6.11784	902.881
752.145	16.0624		6.09741	770.855
752.276	194.435		6.08495	500.314
753.822	4.14491		6.0823	1759.63
753.931	5.49012		6.02835	821.484
754.485	6.87669		5.99956	947.277
755.02	20.7185		5.98702	978.808
755.826	3.77861		5.93954	805.509
756.151	14.7121		5.92899	687.326
756.357	33.9235		5.88553	651.155
756.476	8.66451		5.88398	372.192
756.554	34.6806		5.8574	829.306
757.016	7.7026		5.84682	527.121
757.207	7.93677		5.82776	787.403
757.392	4.08021		5.80832	783.867
758.57	237.399		5.79687	298.247
759.198	21.7265		5.79311	616.177
759.37	11.7303		5.7696	385.954
759.441	6.72893		5.7651	371.693
760.582	33.4625		5.75302	731.713
761.215	10.706		5.75146	676.463
761.454	32.6238		5.71395	737.009
761.473	3.98292		5.70687	301.819
761.588	8.03751		5.70144	923.653
765.357	20.6383		5.68749	637.138
765.856	3.89529		5.68627	578.899
766.624	5.64851		5.66804	237.788
766.864	20.8761		5.66725	794.457
766.937	23.1234		5.66338	745.183
767.645	9.16921		5.64851	766.624
767.857	5.51064		5.63063	823.5
768.859	19.819		5.62705	812.202
769.284	30.3094		5.59622	907.578
770.29	7.72797		5.59467	510.151
770.357	4.10542		5.58808	252.856
770.855	6.09741		5.57399	889.226
771.198	9.47449		5.57159	245.826
771.281	7.60955		5.57034	322.986
771.762	4.59571		5.55906	644.599
772.446	5.32109		5.55654	729.359
772.783	4.27803		5.53773	596.909
773.03	30.3482		5.52029	557.261
773.167	295.258		5.51064	767.857
773.386	324.14		5.49088	705.336
773.404	33.1274		5.49012	753.931
773.551	3.34573		5.48873	865.226
775.18	16.768		5.45861	1067.48
775.301	23.8445		5.43409	790.842
775.395	20.3788		5.38538	289.09
777.209	6.26308		5.37705	458.851
777.342	17.2813		5.36511	736.416
777.478	16.8588		5.36048	235.062
777.687	19.7213		5.32109	772.446
778.481	9.18465		5.3149	335.6
778.539	7.01809		5.30411	875.255
779.158	7.35268		5.2962	893.277
779.492	24.2626		5.28731	289.088
780.497	12.3113		5.26574	387.198
780.528	8.33677		5.25713	725.541
780.552	61.7063		5.25424	713.214
780.746	11.6317		5.24207	881.764
781.331	21.0546		5.22809	830.838
782.57	104.587		5.2254	391.786
783.004	7.3706		5.22359	845.265
783.201	6.22492		5.21713	298.743
783.352	23.4035		5.20636	388.958
783.867	5.80832		5.17997	723.377
784.45	21.3803		5.173	306.585
784.584	25.5551		5.17278	607.229
784.874	18.2783		5.1652	356.684
785.866	7.66732		5.14937	832.355
786.6	7.18182		5.14625	572.541
786.87	22.5637		5.14585	830.695
787.195	3.9236		5.14107	408.944
787.403	5.82776		5.13815	373.598
787.87	4.16958		5.13679	599.16
788.842	4.06472		5.12943	276.156
788.867	7.08943		5.12833	690.173
789.209	23.3265		5.12612	611.181
790.842	5.43409		5.11908	1394.55
791.493	23.2217		5.11332	731.407
793.452	18.6814		5.10984	613.346
794.457	5.66725		5.10684	913.675
794.511	9.3368		5.09914	237.795
795.2	3.01088		5.09614	637.048
795.369	3.10344		5.08852	216.088
795.468	30.6957		5.07976	551.159
796.282	9.55141		5.07712	683.202
796.526	76.0852		5.07227	723.29
797.214	3.61737		5.01486	371.691
798.536	4.43764		4.99237	272.536
799.193	3.98405		4.95812	806.857
799.295	42.3931		4.93558	592.309
801.209	10.4991		4.93542	739.33
801.292	11.5778		4.93433	640.873
804.552	12.6457		4.91724	663.454
805.315	9.54944		4.91602	298.108
805.509	5.93954		4.90455	702.336
806.857	4.95812		4.87979	372.196
807.219	20.5518		4.86825	620.998
807.468	31.3082		4.86497	239.666
807.525	4.3255		4.85796	711.177
808.223	3.44637		4.84889	378.277
808.774	3.88191		4.84235	714.915
808.852	6.14074		4.83764	549.123
812.202	5.62705		4.81668	1628.77
812.583	36.2991		4.81366	399.071
812.962	6.12678		4.8053	258.548
813.21	13.6552		4.79064	305.912
813.238	3.52209		4.78967	827.224
813.295	49.3712		4.7694	250.498
813.498	6.55201		4.75844	982.097
815.234	9.94982		4.74493	664.178
816.994	4.56496		4.73933	500.97
817.206	3.35265		4.7101	301.821
817.524	4.29975		4.69419	728.358
818.513	4.57705		4.68988	683.181
819.22	10.2444		4.67594	257.794
819.495	30.5045		4.67145	653.192
820.526	31.9274		4.66636	539.022
821.484	6.02835		4.65622	513.122
823.193	15.8568		4.65238	744.332
823.5	5.63063		4.62844	651.207
825.227	21.9541		4.62404	235.067
826.231	3.89444		4.61478	435.091
827.224	4.78967		4.59571	771.762
828.95	12.8393		4.59423	681.089
829.204	6.28676		4.5904	859.213
829.306	5.8574		4.58419	713.193
830.695	5.14585		4.58183	671.114
830.838	5.22809		4.58142	1233.36
830.907	3.83808		4.57705	818.513
830.948	16.6957		4.575	377.509
831.035	47.5783		4.5744	364.072
831.22	44.0397		4.57407	1031.3
831.379	3.42178		4.56757	257.044
831.431	9.16622		4.56601	703.278
832.18	23.6689		4.56496	816.994
832.355	5.14937		4.55559	850.932
832.623	10.266		4.54111	364.954
833.227	7.19916		4.53514	329.006
833.254	56.3256		4.5336	371.676
834.191	6.74727		4.52861	1157.36
834.257	9.49708		4.52031	864.005
841.202	45.0175		4.51195	842.791
842.206	9.02712		4.51006	541.117
842.791	4.51195		4.47297	662.246
843.223	3.63973		4.46066	1165.31
844.083	8.5766		4.4573	745.48
844.802	10.0589		4.45463	1009.27
845.265	5.22359		4.44211	975.266
847.215	10.6697		4.43764	798.536
849.23	166.599		4.43278	273.135
849.381	33.3526		4.42302	518.322
850.932	4.55559		4.41229	864.66
851.233	7.32048		4.39308	681.122
851.265	143.661		4.38477	574.005
851.378	3.8207		4.37147	637.032
852.928	3.32041		4.36869	743.144
853.729	23.5674		4.33337	518.099
855.222	3.49011		4.33243	585.256
855.748	10.8567		4.3255	807.525
857.098	4.2782		4.31406	915.243
857.242	3.08892		4.31165	1004.26
857.52	3.02858		4.29975	817.524
859.213	4.5904		4.28691	743.227
861.231	6.94333		4.28557	694.627
862.365	7.00186		4.2782	857.098
864.005	4.52031		4.27803	772.783
864.66	4.41229		4.23024	238.128
864.773	4.05248		4.21471	977.566
865.226	5.48873		4.20086	700.179
867.24	265.844		4.19806	901.223
867.391	7.22599		4.19488	371.163
867.687	6.4134		4.18824	297.9
869.243	11.8953		4.17798	371.681
869.703	79.3778		4.16958	787.87
871.481	3.79094		4.1691	423.215
871.714	14.0263		4.16704	566.943
872.215	13.9463		4.16256	318.506
872.704	13.7225		4.15594	667.149
873.232	12.2187		4.14914	898.408
873.497	8.65536		4.14559	1035.29
875.255	5.30411		4.14491	753.822
875.419	28.7596		4.13471	248.17
875.714	11.518		4.12767	598.905
877.227	6.19561		4.12508	425.632
877.729	63.6581		4.123	248.131
877.754	6.57247		4.10588	368.73
879.242	4.03001		4.10542	770.357
879.393	44.9677		4.10499	453.101
879.747	25.7846		4.08021	757.392
880.633	11.4309		4.06472	788.842
881.764	5.24207		4.06204	977.289
888.402	7.94558		4.06001	643.288
889.226	5.57399		4.05248	864.773
889.674	3.15761		4.04826	1702
891.241	26.4027		4.04202	721.157
891.688	50.7604		4.03001	879.242
891.713	3.97708		3.9873	321.63
893.277	5.2962		3.98405	799.193
893.703	221.102		3.98292	761.473
893.73	11.8203		3.98266	964.968
894.586	9.40195		3.98187	204.528
895.718	78.515		3.97708	891.713
896.723	35.417		3.975	653.171
897.403	14.5682		3.96833	475.234
897.734	16.0303		3.94836	688.197
898.408	4.14914		3.93009	675.176
898.741	6.65812		3.9236	787.195
899.249	3.30463		3.89783	996.309
899.715	6.26044		3.89529	765.856
901.223	4.19806		3.89444	826.231
901.728	20.3861		3.89211	250.013
902.881	6.11784		3.89042	1337.42
903.243	6.65916		3.88785	646.615
903.746	10.7059		3.8855	1335.39
903.876	3.36244		3.88191	808.774
904.877	7.08549		3.88109	699.099
905.264	3.66616		3.85725	347.007
905.43	158.519		3.8472	947.755
905.563	3.23353		3.84571	365.984
905.763	3.53855		3.83808	830.907
907.238	3.05976		3.8207	851.378
907.437	7.65537		3.80562	292.571
907.578	5.59622		3.8016	501.984
909.253	42.7186		3.80076	743.591
909.403	11.2563		3.79511	292.587
909.698	6.78581		3.79482	235.066
913.675	5.10684		3.79094	871.481
915.243	4.31406		3.77861	755.826
915.69	34.4984		3.76773	252.861
917.703	100.229		3.75411	1176.38
918.411	6.19606		3.7392	612.334
918.735	3.39665		3.72674	378.178
919.579	23.8973		3.71535	350.988
919.72	51.5571		3.7132	991.26
921.253	8.95243		3.70036	465.101
921.539	3.5585		3.69066	553.321
921.737	23.7573		3.67606	254.574
923.269	8.25418		3.67517	716.38
923.554	6.64233		3.66616	905.264
923.653	5.70144		3.66137	619.277
923.752	6.79508		3.63973	843.223
924.864	3.08764		3.63881	733.424
927.415	6.14817		3.61737	797.214
933.253	8.11471		3.59924	670.299
933.698	3.02631		3.59041	298.918
935.439	143.561		3.57458	637.539
935.467	11.9729		3.56348	996.817
935.553	28.2968		3.56043	310.743
939.603	9.44031		3.5585	921.539
945.254	6.49196		3.55326	750.51
947.277	5.99956		3.55274	600.881
947.755	3.8472		3.55176	607.391
951.264	12.0319		3.53855	905.763
953.566	3.42249		3.5259	523.107
955.577	20.5536		3.52567	643.327
963.264	17.3305		3.52209	813.238
963.603	13.7453		3.50527	328.997
964.968	3.98266		3.50456	691.926
969.272	10.1638		3.49011	734.569
975.266	4.44211		3.49011	855.222
975.552	7.01079		3.4773	623.1
976.813	3.35091		3.47083	1252.76
977.289	4.06204		3.46641	634.838
977.566	4.21471		3.46295	373.599
978.808	5.98702		3.45895	434.85
979.26	3.00965		3.45148	716.911
979.577	27.8355		3.4498	681.386
980.804	3.37695		3.44637	808.223
981.274	9.99979		3.4397	731.322
982.097	4.75844		3.42946	1515.46
985.248	7.34077		3.42249	953.566
987.278	8.73292		3.42178	831.379
989.217	3.03593		3.42033	629.321
991.26	3.7132		3.40836	319.983
993.275	13.9617		3.39665	918.735
995.306	20.2662		3.38552	247.633
996.309	3.89783		3.37695	980.804
996.817	3.56348		3.37215	689.086
1003.26	19.7513		3.36975	232.083
1004.26	4.31165		3.36935	297.24
1005.28	6.56847		3.36839	573.292
1009.27	4.45463		3.36712	1085.32
1011.28	62.6906		3.36468	725.364
1013.32	55.0639		3.36244	903.876
1014.32	12.6465		3.35265	817.206
1023.28	9.34874		3.35091	976.813
1029.29	106.783		3.34573	773.551
1031.3	4.57407		3.33317	583.129
1033.65	8.0968		3.33275	749.395
1035.29	4.14559		3.32314	356.686
1041.45	3.17915		3.32041	852.928
1053.3	9.93069		3.31842	662.142
1053.91	22.8535		3.31548	615.266
1067.48	5.45861		3.30626	660.655
1071.31	16.3754		3.30463	899.249
1085.32	3.36712		3.29926	307.176
1090.26	26.1479		3.29195	580.894
1095.31	6.44605		3.28184	750.935
1096.92	134.186		3.26162	697.157
1097.49	7.62619		3.24301	636.006
1111.83	3.05697		3.23878	386.704
1112.04	37.7466		3.23595	447.859
1113.32	6.61743		3.23353	905.563
1122.86	6.47126		3.22553	711.439
1137.32	3.03556		3.18845	257.799
1155.33	6.49256		3.18162	725.133
1157.36	4.52861		3.17915	1041.45
1159.16	29.7772		3.17739	734.852
1165.31	4.46066		3.17262	371.697
1173.34	17.3235		3.16459	364.976
1175.37	16.1948		3.15761	889.674
1176.38	3.75411		3.14826	241.493
1191.35	33.4552		3.14224	626.589
1198.82	46.8332		3.13123	699.336
1224.24	55.6245		3.12709	637.241
1233.36	4.58142		3.1204	662.329
1252.76	3.47083		3.11985	713.302
1268.56	8.47274		3.10344	795.369
1310.96	13.0757		3.09639	725.193
1335.39	3.8855		3.09037	373.006
1337.42	3.89042		3.08997	248.125
1343.72	14.1287		3.08892	857.242
1353.4	9.89593		3.08764	924.864
1354.41	3.05882		3.08589	534.09
1378.17	36.6235		3.06849	235.069
1394.55	5.11908		3.05976	907.238
1515.46	3.42946		3.05882	1354.41
1534.5	22.9091		3.05697	1111.83
1602.31	6.60614		3.04111	371.7
1626.54	7.34942		3.03982	248.126
1628.77	4.81668		3.03593	989.217
1679.65	166.941		3.03556	1137.32
1701.46	9.53149		3.03481	740.53
1702	4.04826		3.02858	857.52
1733.82	149.3		3.02631	933.698
1759.63	6.0823		3.01088	795.2
1791.6	9.37775		3.00984	365.108
1853.36	442.29		3.00965	979.26

## Sheet: S1 Table C
molid	inputmass	adduct	mass	dppm	name	formula	cas	kegg	msms	lnk
86993	743.375	[M+H]+	742.365	3	Hordatine B glucoside	C35H50N8O10			NO	metabo_info.php?molid=86993
67471	743.375	[M+Na]+	720.389	3	Epivoacorine	C43H52N4O6	4835-65-8	[M+H]+ ; [M+Na]+ ; [M+K]+	NO	metabo_info.php?molid=67471
57767	743.375	[M+K]+	704.414	2	cimicifoetiside B	C39H60O11			NO	metabo_info.php?molid=57767
86994	713.364	[M+H]+	712.354	2	Hordatine A glucoside	C34H48N8O9			NO	metabo_info.php?molid=86994
67503	713.364	[M+Na]+	690.378	5	Gabunamine	C42H50N4O5	66086-99-5	C09193	NO	metabo_info.php?molid=67503
67505	713.364	[M+Na]+	690.378	5	Gabunine	C42H50N4O5	1357-30-8	C09195	NO	metabo_info.php?molid=67505
43515	273.039	[M+H]+	272.032	0	QUINALIZARIN	C14H8O6	81-61-8		YES	metabo_info.php?molid=43515
66735	273.039	[M+Na]+	250.048	8	2-Hydroxy-6-oxo-6-(2-hydroxyphenoxy)-hexa-2,4-dienoate	C12H10O6		C07734	NO	metabo_info.php?molid=66735
1210	273.039	[M+Na]+	250.048	8	2H-1-Benzopyran-6-acetic acid, 7-hydroxy-8-methoxy-2-oxo-	C12H10O6	71942-06-8		NO	metabo_info.php?molid=1210
2434	273.039	[M+Na]+	250.052	8	Sulfadiazine	C10H10N4O2S	68-35-9	C07658	YES	metabo_info.php?molid=2434
71255	273.039	[M+K]+	234.074	8	(R)-(Homo)3-citrate	C9H14O7		C16598	NO	metabo_info.php?molid=71255
71256	273.039	[M+K]+	234.074	8	1-Hydroxyhexane-1,2,6-tricarboxylate	C9H14O7		C16600	NO	metabo_info.php?molid=71256
88461	273.039	[M+K]+	234.074	8	1-Isopropyl citrate	C9H14O7	1321-57-9		NO	metabo_info.php?molid=88461
92847	273.039	[M+K]+	234.074	8	2-Isopropyl citrate	C9H14O7	83966-24-9		NO	metabo_info.php?molid=92847
47514	543.133	[M+H]+	542.121	7	Isochamaejasmin	C30H22O10		C09758	NO	metabo_info.php?molid=47514
71324	543.133	[M+H]+	542.121	7	Rugulosin	C30H22O10	23537-16-8	C16764	NO	metabo_info.php?molid=71324
91766	543.133	[M+H]+	542.121	7	Yuccaol C	C30H22O10			NO	metabo_info.php?molid=91766
43262	543.133	[M+Na]+	520.142	2	Mometasone Furoate	C27H30Cl2O6		C07817	NO	metabo_info.php?molid=43262
45471	543.133	[M+Na]+	520.148	8	JZL 184	C27H24N2O9	1101854-58-3		YES	metabo_info.php?molid=45471
113879	543.133	[M+K]+	504.168	2	Cys Gly Tyr Tyr	C23H28N4O7S			NO	metabo_info.php?molid=113879
119199	543.133	[M+K]+	504.168	2	Cys Tyr Gly Tyr	C23H28N4O7S			NO	metabo_info.php?molid=119199
119465	543.133	[M+K]+	504.168	2	Cys Tyr Tyr Gly	C23H28N4O7S			NO	metabo_info.php?molid=119465
144278	543.133	[M+K]+	504.168	2	Gly Cys Tyr Tyr	C23H28N4O7S			NO	metabo_info.php?molid=144278
151118	543.133	[M+K]+	504.168	2	Gly Tyr Cys Tyr	C23H28N4O7S			NO	metabo_info.php?molid=151118
151460	543.133	[M+K]+	504.168	2	Gly Tyr Tyr Cys	C23H28N4O7S			NO	metabo_info.php?molid=151460
255998	543.133	[M+K]+	504.168	2	Tyr Cys Gly Tyr	C23H28N4O7S			NO	metabo_info.php?molid=255998
256264	543.133	[M+K]+	504.168	2	Tyr Cys Tyr Gly	C23H28N4O7S			NO	metabo_info.php?molid=256264
257518	543.133	[M+K]+	504.168	2	Tyr Gly Cys Tyr	C23H28N4O7S			NO	metabo_info.php?molid=257518
257860	543.133	[M+K]+	504.168	2	Tyr Gly Tyr Cys	C23H28N4O7S			NO	metabo_info.php?molid=257860
263104	543.133	[M+K]+	504.168	2	Tyr Tyr Cys Gly	C23H28N4O7S			NO	metabo_info.php?molid=263104
263180	543.133	[M+K]+	504.168	2	Tyr Tyr Gly Cys	C23H28N4O7S			NO	metabo_info.php?molid=263180
43984	543.133	[M+K]+	504.169	0	MELEZITOSE	C18H32O16	597-12-6	C08243	NO	metabo_info.php?molid=43984
138	543.133	[M+K]+	504.169	0	Raffinose	C18H32O16	512-69-6	C00492	YES	metabo_info.php?molid=138
3584	543.133	[M+K]+	504.169	0	Cellotriose	C18H32O16	33404-34-1	C06219	NO	metabo_info.php?molid=3584
3585	543.133	[M+K]+	504.169	0	Maltotriose	C18H32O16	1109-28-0	C01835	YES	metabo_info.php?molid=3585
6945	543.133	[M+K]+	504.169	0	Levan	C18H32O16		C06215	YES	metabo_info.php?molid=6945
44694	543.133	[M+K]+	504.169	0	1-Kestose	C18H32O16	470-69-9	C03661	YES	metabo_info.php?molid=44694
58482	543.133	[M+K]+	504.169	0	3-Galactosyllactose	C18H32O16	32694-82-9		NO	metabo_info.php?molid=58482
58569	543.133	[M+K]+	504.169	0	Dextrin	C18H32O16	9004-53-9	C00721	NO	metabo_info.php?molid=58569
63175	543.133	[M+K]+	504.169	0	D-Gal &alpha
65526	543.133	[M+K]+	504.169	0	Panose	C18H32O16	33401-87-5	C00713	NO	metabo_info.php?molid=65526
65541	543.133	[M+K]+	504.169	0	Galactomannan	C18H32O16		C00883	NO	metabo_info.php?molid=65541
65966	543.133	[M+K]+	504.169	0	6-alpha-Maltosylglucose	C18H32O16		C03367	NO	metabo_info.php?molid=65966
66061	543.133	[M+K]+	504.169	0	6F-alpha-D-Galactosylsucrose	C18H32O16	470-57-5	C03848	NO	metabo_info.php?molid=66061
66866	543.133	[M+K]+	504.169	0	Umbelliferose	C18H32O16	546-60-1	C08251	NO	metabo_info.php?molid=66866
86583	543.133	[M+K]+	504.169	0	Gentiotriose	C18H32O16	32590-17-3		NO	metabo_info.php?molid=86583
86589	543.133	[M+K]+	504.169	0	Neokestose	C18H32O16	3688-75-3		NO	metabo_info.php?molid=86589
86590	543.133	[M+K]+	504.169	0	Galactotriose	C18H32O16	5077-30-5		NO	metabo_info.php?molid=86590
86594	543.133	[M+K]+	504.169	0	6-O-Glucosylmaltose	C18H32O16	25218-29-5		NO	metabo_info.php?molid=86594
86595	543.133	[M+K]+	504.169	0	beta-D-Fructofuranosyl alpha-D-glucopyranosyl-(1->4)-D-glucopyranoside	C18H32O16			NO	metabo_info.php?molid=86595
89466	543.133	[M+K]+	504.169	0	6-Kestose	C18H32O16	562-68-5		NO	metabo_info.php?molid=89466
89696	543.133	[M+K]+	504.169	0	Gentianose	C18H32O16	25954-44-3		NO	metabo_info.php?molid=89696
90622	543.133	[M+K]+	504.169	0	Fagopyritol B2	C18H32O16	116261-02-0		NO	metabo_info.php?molid=90622
93481	543.133	[M+K]+	504.169	0	beta-D-Galactopyranosyl-(1->2)-[beta-D-galactopyranosyl-(1->4)]-D-galactose	C18H32O16	83788-45-8		NO	metabo_info.php?molid=93481
93482	543.133	[M+K]+	504.169	0	beta-D-Galactopyranosyl-(1->4)-beta-D-galactopyranosyl-(1->4)-D-galactose	C18H32O16	6118-87-2		NO	metabo_info.php?molid=93482
93483	543.133	[M+K]+	504.169	0	beta-D-Galactopyranosyl-(1->3)-beta-D-galactopyranosyl-(1->6)-D-galactose	C18H32O16			NO	metabo_info.php?molid=93483
94258	543.133	[M+K]+	504.169	0	3-beta-Gentiobiosylglucose	C18H32O16	32581-32-1		NO	metabo_info.php?molid=94258
94259	543.133	[M+K]+	504.169	0	alpha-D-Glucopyranosyl-(1->6)-alpha-D-glucopyranosyl-(1->2)-D-glucose	C18H32O16	40983-70-8		NO	metabo_info.php?molid=94259
94261	543.133	[M+K]+	504.169	0	4-beta-Laminaribiosylglucose	C18H32O16	32581-38-7		NO	metabo_info.php?molid=94261
94262	543.133	[M+K]+	504.169	0	alpha-D-Glucopyranosyl-(1->4)-alpha-D-glucopyranosyl-(1->6)-D-glucose	C18H32O16	32581-33-2		NO	metabo_info.php?molid=94262
94263	543.133	[M+K]+	504.169	0	3-beta-Cellobiosylglucose	C18H32O16	32581-36-5		NO	metabo_info.php?molid=94263
94716	543.133	[M+K]+	504.169	0	Fagopyritol A2	C18H32O16			NO	metabo_info.php?molid=94716
95425	543.133	[M+K]+	504.169	0	Sophorotriose	C18H32O16	32581-40-1		NO	metabo_info.php?molid=95425
96189	543.133	[M+K]+	504.169	0	nephritogenoside	C18H32O16	81276-22-4		NO	metabo_info.php?molid=96189
87070	705.186	[M+H]+	704.174	6	Occidentoside	C36H32O15	77782-91-3		NO	metabo_info.php?molid=87070
51178	705.186	[M+K]+	666.216	9	Quercetin 5,7,3\',4\'-tetramethyl ether 3-rutinoside	C31H38O16			NO	metabo_info.php?molid=51178
93919	705.186	[M+K]+	666.216	9	Tetramethylquercetin 3-rutinoside	C31H38O16	58528-03-3		NO	metabo_info.php?molid=93919
4199	705.186	[M+K]+	666.222	1	maltotetraose	C24H42O21	34612-38-9	C02052	YES	metabo_info.php?molid=4199
160	705.186	[M+K]+	666.222	1	Glycogen	C24H42O21	9005-79-2	C00182	NO	metabo_info.php?molid=160
6951	705.186	[M+K]+	666.222	1	Stachyose	C24H42O21	10094-58-3
63206	705.186	[M+K]+	666.222	1	Cellotetraose	C24H42O21	38819-01-1	C02013	YES	metabo_info.php?molid=63206
66094	705.186	[M+K]+	666.222	1	Isolychnose	C24H42O21	546-35-0	C03989	NO	metabo_info.php?molid=66094
66268	705.186	[M+K]+	666.222	1	1,3-alpha-D-Mannosyl-1,2-alpha-D-mannosyl-1,2-alpha-D-mannosyl-D-mannose	C24H42O21		C04861	NO	metabo_info.php?molid=66268
66859	705.186	[M+K]+	666.222	1	Lychnose	C24H42O21	512-65-2	C08242	NO	metabo_info.php?molid=66859
66864	705.186	[M+K]+	666.222	1	Sesamose	C24H42O21	58985-23-2	C08248	NO	metabo_info.php?molid=66864
86596	705.186	[M+K]+	666.222	1	Mannan	C24H42O21	9036-88-8		NO	metabo_info.php?molid=86596
90623	705.186	[M+K]+	666.222	1	Fagopyritol B3	C24H42O21	208708-11-6		NO	metabo_info.php?molid=90623
93168	705.186	[M+K]+	666.222	1	Bifurcose	C24H42O21	3568-31-8		NO	metabo_info.php?molid=93168
93497	705.186	[M+K]+	666.222	1	Neobifurcose	C24H42O21			NO	metabo_info.php?molid=93497
93767	705.186	[M+K]+	666.222	1	3-beta-Glucosylcellotriose	C24H42O21	58484-04-1		NO	metabo_info.php?molid=93767
93768	705.186	[M+K]+	666.222	1	3-beta-Cellobiosylcellobiose	C24H42O21	103762-93-2		NO	metabo_info.php?molid=93768
93770	705.186	[M+K]+	666.222	1	Nystose	C24H42O21	13133-07-8		NO	metabo_info.php?molid=93770
94717	705.186	[M+K]+	666.222	1	Fagopyritol A3	C24H42O21			NO	metabo_info.php?molid=94717
96078	381.079	[M+Na]+	358.09	0	Dihydrocaffeic acid 3-O-glucuronide	C15H18O10			NO	metabo_info.php?molid=96078
1082	381.079	[M+Na]+	358.09	0	Mebeverine metabolite (Veratric acid glucuronide)	C15H18O10	19237-57-1		NO	metabo_info.php?molid=1082
58181	381.079	[M+Na]+	358.093	7	N1-(5-Phospho-a-D-ribosyl)-5,6-dimethylbenzimidazole	C14H19N2O7P		C04778	NO	metabo_info.php?molid=58181
44768	381.079	[M+K]+	342.116	0	Leucrose	C12H22O11	7158-70-5		NO	metabo_info.php?molid=44768
137	381.079	[M+K]+	342.116	0	Sucrose	C12H22O11	57-50-1	C00089	YES	metabo_info.php?molid=137
267	381.079	[M+K]+	342.116	0	D-Lactose	C12H22O11	63-42-3	C00243	YES	metabo_info.php?molid=267
412	381.079	[M+K]+	342.116	0	Isomaltose	C12H22O11	499-40-1	C00252	NO	metabo_info.php?molid=412
413	381.079	[M+K]+	342.116	0	Maltose	C12H22O11	69-79-4	C00208	YES	metabo_info.php?molid=413
916	381.079	[M+K]+	342.116	0	Lactulose	C12H22O11	4618-18-2	C07064	YES	metabo_info.php?molid=916
3476	381.079	[M+K]+	342.116	0	Epimelibiose	C12H22O11	17296-19-4	C05400	NO	metabo_info.php?molid=3476
3477	381.079	[M+K]+	342.116	0	Galactinol (1-&alpha
3478	381.079	[M+K]+	342.116	0	Melibiose	C12H22O11	585-99-9	C05402	YES	metabo_info.php?molid=3478
3479	381.079	[M+K]+	342.116	0	&alpha
3480	381.079	[M+K]+	342.116	0	Cellobiose	C12H22O11	16462-44-5	C00185	NO	metabo_info.php?molid=3480
3481	381.079	[M+K]+	342.116	0	Laminaribiose	C12H22O11	34980-39-7	C02048	NO	metabo_info.php?molid=3481
3482	381.079	[M+K]+	342.116	0	Nigerose (Sakebiose)	C12H22O11	497-48-3	C01518	NO	metabo_info.php?molid=3482
44757	381.079	[M+K]+	342.116	0	Gentiobiose	C12H22O11	554-91-6	C08240	NO	metabo_info.php?molid=44757
58486	381.079	[M+K]+	342.116	0	3-b-Galactopyranosyl glucose	C12H22O11	28447-38-3		NO	metabo_info.php?molid=58486
62463	381.079	[M+K]+	342.116	0	D-(+)-Turanose	C12H22O11	547-25-1	C19636	YES	metabo_info.php?molid=62463
62465	381.079	[M+K]+	342.116	0	Kojibiose	C12H22O11	2140-29-6	C19632	YES	metabo_info.php?molid=62465
65636	381.079	[M+K]+	342.116	0	Inulobiose	C12H22O11	470-58-6	C01711	NO	metabo_info.php?molid=65636
65637	381.079	[M+K]+	342.116	0	Levanbiose	C12H22O11	17669-60-2	C01725	NO	metabo_info.php?molid=65637
65642	381.079	[M+K]+	342.116	0	Palatinose	C12H22O11	13718-94-0	C01742	NO	metabo_info.php?molid=65642
66065	381.079	[M+K]+	342.116	0	D-Fructosyl-D-fructofuranose	C12H22O11		C03857	NO	metabo_info.php?molid=66065
66122	381.079	[M+K]+	342.116	0	alpha-D-Glucosyl-(1,3)-D-mannose	C12H22O11		C04147	NO	metabo_info.php?molid=66122
66865	381.079	[M+K]+	342.116	0	Sophorose	C12H22O11	20880-64-2	C08250	NO	metabo_info.php?molid=66865
70960	381.079	[M+K]+	342.116	0	2-alpha-D-Glucosyl-D-glucose	C12H22O11		C15548	NO	metabo_info.php?molid=70960
73270	381.079	[M+K]+	342.116	0	Maltulose	C12H22O11	17606-72-3	C19633	NO	metabo_info.php?molid=73270
73271	381.079	[M+K]+	342.116	0	Melibiulose	C12H22O11	111188-56-8	C19634	NO	metabo_info.php?molid=73271
73348	381.079	[M+K]+	342.116	0	3-O-alpha-D-Mannopyranosyl-alpha-D-mannopyranose	C12H22O11		C19773	NO	metabo_info.php?molid=73348
84975	381.079	[M+K]+	342.116	0	BETA-D-LACTOSE	C12H22O11	5965-66-2	C01970	YES	metabo_info.php?molid=84975
85165	381.079	[M+K]+	342.116	0	ALPHA,BETA-TREHALOSE	C12H22O11	585-91-1		YES	metabo_info.php?molid=85165
86598	381.079	[M+K]+	342.116	0	Mannobiose	C12H22O11	14417-51-7		NO	metabo_info.php?molid=86598
89212	381.079	[M+K]+	342.116	0	DEAE-cellulose	C12H22O11	9013-34-7		NO	metabo_info.php?molid=89212
93828	381.079	[M+K]+	342.116	0	Glucinol	C12H22O11	4539-73-5		NO	metabo_info.php?molid=93828
94422	381.079	[M+K]+	342.116	0	Fagopyritol A1	C12H22O11	209287-65-0		NO	metabo_info.php?molid=94422
5118	381.079	[M+K]+	342.116	0	D-(+)-Cellobiose	C12H22O11	528-50-7		YES	metabo_info.php?molid=5118
47752	365.105	[M+H]+	364.095	9	Robustone	C21H16O6			NO	metabo_info.php?molid=47752
47756	365.105	[M+H]+	364.095	9	5-Hydroxy-3\',4\'-methylenedioxy-6\'\',6\'\'-dimethylpyrano[2\'\',3\'\':7,8]isoflavone	C21H16O6			NO	metabo_info.php?molid=47756
48357	365.105	[M+H]+	364.095	9	Gancaonin F	C21H16O6			NO	metabo_info.php?molid=48357
68451	365.105	[M+H]+	364.095	9	Justicidin B	C21H16O6	17951-19-8	C10636	NO	metabo_info.php?molid=68451
89160	365.105	[M+H]+	364.095	9	Gerberinol	C21H16O6	84153-78-6		NO	metabo_info.php?molid=89160
44768	365.105	[M+Na]+	342.116	0	Leucrose	C12H22O11	7158-70-5		NO	metabo_info.php?molid=44768
137	365.105	[M+Na]+	342.116	0	Sucrose	C12H22O11	57-50-1	C00089	YES	metabo_info.php?molid=137
267	365.105	[M+Na]+	342.116	0	D-Lactose	C12H22O11	63-42-3	C00243	YES	metabo_info.php?molid=267
412	365.105	[M+Na]+	342.116	0	Isomaltose	C12H22O11	499-40-1	C00252	NO	metabo_info.php?molid=412
413	365.105	[M+Na]+	342.116	0	Maltose	C12H22O11	69-79-4	C00208	YES	metabo_info.php?molid=413
916	365.105	[M+Na]+	342.116	0	Lactulose	C12H22O11	4618-18-2	C07064	YES	metabo_info.php?molid=916
3476	365.105	[M+Na]+	342.116	0	Epimelibiose	C12H22O11	17296-19-4	C05400	NO	metabo_info.php?molid=3476
3477	365.105	[M+Na]+	342.116	0	Galactinol (1-&alpha
3478	365.105	[M+Na]+	342.116	0	Melibiose	C12H22O11	585-99-9	C05402	YES	metabo_info.php?molid=3478
3479	365.105	[M+Na]+	342.116	0	&alpha
3480	365.105	[M+Na]+	342.116	0	Cellobiose	C12H22O11	16462-44-5	C00185	NO	metabo_info.php?molid=3480
3481	365.105	[M+Na]+	342.116	0	Laminaribiose	C12H22O11	34980-39-7	C02048	NO	metabo_info.php?molid=3481
3482	365.105	[M+Na]+	342.116	0	Nigerose (Sakebiose)	C12H22O11	497-48-3	C01518	NO	metabo_info.php?molid=3482
44757	365.105	[M+Na]+	342.116	0	Gentiobiose	C12H22O11	554-91-6	C08240	NO	metabo_info.php?molid=44757
58486	365.105	[M+Na]+	342.116	0	3-b-Galactopyranosyl glucose	C12H22O11	28447-38-3		NO	metabo_info.php?molid=58486
62463	365.105	[M+Na]+	342.116	0	D-(+)-Turanose	C12H22O11	547-25-1	C19636	YES	metabo_info.php?molid=62463
62465	365.105	[M+Na]+	342.116	0	Kojibiose	C12H22O11	2140-29-6	C19632	YES	metabo_info.php?molid=62465
65636	365.105	[M+Na]+	342.116	0	Inulobiose	C12H22O11	470-58-6	C01711	NO	metabo_info.php?molid=65636
65637	365.105	[M+Na]+	342.116	0	Levanbiose	C12H22O11	17669-60-2	C01725	NO	metabo_info.php?molid=65637
65642	365.105	[M+Na]+	342.116	0	Palatinose	C12H22O11	13718-94-0	C01742	NO	metabo_info.php?molid=65642
66065	365.105	[M+Na]+	342.116	0	D-Fructosyl-D-fructofuranose	C12H22O11		C03857	NO	metabo_info.php?molid=66065
66122	365.105	[M+Na]+	342.116	0	alpha-D-Glucosyl-(1,3)-D-mannose	C12H22O11		C04147	NO	metabo_info.php?molid=66122
66865	365.105	[M+Na]+	342.116	0	Sophorose	C12H22O11	20880-64-2	C08250	NO	metabo_info.php?molid=66865
70960	365.105	[M+Na]+	342.116	0	2-alpha-D-Glucosyl-D-glucose	C12H22O11		C15548	NO	metabo_info.php?molid=70960
73270	365.105	[M+Na]+	342.116	0	Maltulose	C12H22O11	17606-72-3	C19633	NO	metabo_info.php?molid=73270
73271	365.105	[M+Na]+	342.116	0	Melibiulose	C12H22O11	111188-56-8	C19634	NO	metabo_info.php?molid=73271
73348	365.105	[M+Na]+	342.116	0	3-O-alpha-D-Mannopyranosyl-alpha-D-mannopyranose	C12H22O11		C19773	NO	metabo_info.php?molid=73348
84975	365.105	[M+Na]+	342.116	0	BETA-D-LACTOSE	C12H22O11	5965-66-2	C01970	YES	metabo_info.php?molid=84975
85165	365.105	[M+Na]+	342.116	0	ALPHA,BETA-TREHALOSE	C12H22O11	585-91-1		YES	metabo_info.php?molid=85165
86598	365.105	[M+Na]+	342.116	0	Mannobiose	C12H22O11	14417-51-7		NO	metabo_info.php?molid=86598
89212	365.105	[M+Na]+	342.116	0	DEAE-cellulose	C12H22O11	9013-34-7		NO	metabo_info.php?molid=89212
93828	365.105	[M+Na]+	342.116	0	Glucinol	C12H22O11	4539-73-5		NO	metabo_info.php?molid=93828
94422	365.105	[M+Na]+	342.116	0	Fagopyritol A1	C12H22O11	209287-65-0		NO	metabo_info.php?molid=94422
5118	365.105	[M+Na]+	342.116	0	D-(+)-Cellobiose	C12H22O11	528-50-7		YES	metabo_info.php?molid=5118
69552	365.105	[M+K]+	326.14	6	Procaterol hydrochloride	C16H23ClN2O3	59828-07-8	C13235	NO	metabo_info.php?molid=69552
85533	365.105	[M+K]+	326.145	8	Acepromazine	C19H22N2OS	61-00-7		NO	metabo_info.php?molid=85533
85534	365.105	[M+K]+	326.145	8	Aceprometazine	C19H22N2OS	13461-01-3		NO	metabo_info.php?molid=85534
47481	527.158	[M+H]+	526.148	6	Viscutin 1	C27H26O11			NO	metabo_info.php?molid=47481
65419	527.158	[M+H]+	526.148	6	6-Desmethoxy hormothamnione triacetate	C27H26O11			YES	metabo_info.php?molid=65419
120339	527.158	[M+H]+	526.155	6	Asp Asp Asp Tyr	C21H26N4O12			NO	metabo_info.php?molid=120339
120662	527.158	[M+H]+	526.155	6	Asp Asp Tyr Asp	C21H26N4O12			NO	metabo_info.php?molid=120662
127122	527.158	[M+H]+	526.155	6	Asp Tyr Asp Asp	C21H26N4O12			NO	metabo_info.php?molid=127122
256321	527.158	[M+H]+	526.155	6	Tyr Asp Asp Asp	C21H26N4O12			NO	metabo_info.php?molid=256321
113879	527.158	[M+Na]+	504.168	2	Cys Gly Tyr Tyr	C23H28N4O7S			NO	metabo_info.php?molid=113879
119199	527.158	[M+Na]+	504.168	2	Cys Tyr Gly Tyr	C23H28N4O7S			NO	metabo_info.php?molid=119199
119465	527.158	[M+Na]+	504.168	2	Cys Tyr Tyr Gly	C23H28N4O7S			NO	metabo_info.php?molid=119465
144278	527.158	[M+Na]+	504.168	2	Gly Cys Tyr Tyr	C23H28N4O7S			NO	metabo_info.php?molid=144278
151118	527.158	[M+Na]+	504.168	2	Gly Tyr Cys Tyr	C23H28N4O7S			NO	metabo_info.php?molid=151118
151460	527.158	[M+Na]+	504.168	2	Gly Tyr Tyr Cys	C23H28N4O7S			NO	metabo_info.php?molid=151460
255998	527.158	[M+Na]+	504.168	2	Tyr Cys Gly Tyr	C23H28N4O7S			NO	metabo_info.php?molid=255998
256264	527.158	[M+Na]+	504.168	2	Tyr Cys Tyr Gly	C23H28N4O7S			NO	metabo_info.php?molid=256264
257518	527.158	[M+Na]+	504.168	2	Tyr Gly Cys Tyr	C23H28N4O7S			NO	metabo_info.php?molid=257518
257860	527.158	[M+Na]+	504.168	2	Tyr Gly Tyr Cys	C23H28N4O7S			NO	metabo_info.php?molid=257860
263104	527.158	[M+Na]+	504.168	2	Tyr Tyr Cys Gly	C23H28N4O7S			NO	metabo_info.php?molid=263104
263180	527.158	[M+Na]+	504.168	2	Tyr Tyr Gly Cys	C23H28N4O7S			NO	metabo_info.php?molid=263180
43984	527.158	[M+Na]+	504.169	0	MELEZITOSE	C18H32O16	597-12-6	C08243	NO	metabo_info.php?molid=43984
138	527.158	[M+Na]+	504.169	0	Raffinose	C18H32O16	512-69-6	C00492	YES	metabo_info.php?molid=138
3584	527.158	[M+Na]+	504.169	0	Cellotriose	C18H32O16	33404-34-1	C06219	NO	metabo_info.php?molid=3584
3585	527.158	[M+Na]+	504.169	0	Maltotriose	C18H32O16	1109-28-0	C01835	YES	metabo_info.php?molid=3585
6945	527.158	[M+Na]+	504.169	0	Levan	C18H32O16		C06215	YES	metabo_info.php?molid=6945
44694	527.158	[M+Na]+	504.169	0	1-Kestose	C18H32O16	470-69-9	C03661	YES	metabo_info.php?molid=44694
58482	527.158	[M+Na]+	504.169	0	3-Galactosyllactose	C18H32O16	32694-82-9		NO	metabo_info.php?molid=58482
58569	527.158	[M+Na]+	504.169	0	Dextrin	C18H32O16	9004-53-9	C00721	NO	metabo_info.php?molid=58569
63175	527.158	[M+Na]+	504.169	0	D-Gal &alpha
65526	527.158	[M+Na]+	504.169	0	Panose	C18H32O16	33401-87-5	C00713	NO	metabo_info.php?molid=65526
65541	527.158	[M+Na]+	504.169	0	Galactomannan	C18H32O16		C00883	NO	metabo_info.php?molid=65541
65966	527.158	[M+Na]+	504.169	0	6-alpha-Maltosylglucose	C18H32O16		C03367	NO	metabo_info.php?molid=65966
66061	527.158	[M+Na]+	504.169	0	6F-alpha-D-Galactosylsucrose	C18H32O16	470-57-5	C03848	NO	metabo_info.php?molid=66061
66866	527.158	[M+Na]+	504.169	0	Umbelliferose	C18H32O16	546-60-1	C08251	NO	metabo_info.php?molid=66866
86583	527.158	[M+Na]+	504.169	0	Gentiotriose	C18H32O16	32590-17-3		NO	metabo_info.php?molid=86583
86589	527.158	[M+Na]+	504.169	0	Neokestose	C18H32O16	3688-75-3		NO	metabo_info.php?molid=86589
86590	527.158	[M+Na]+	504.169	0	Galactotriose	C18H32O16	5077-30-5		NO	metabo_info.php?molid=86590
86594	527.158	[M+Na]+	504.169	0	6-O-Glucosylmaltose	C18H32O16	25218-29-5		NO	metabo_info.php?molid=86594
86595	527.158	[M+Na]+	504.169	0	beta-D-Fructofuranosyl alpha-D-glucopyranosyl-(1->4)-D-glucopyranoside	C18H32O16			NO	metabo_info.php?molid=86595
89466	527.158	[M+Na]+	504.169	0	6-Kestose	C18H32O16	562-68-5		NO	metabo_info.php?molid=89466
89696	527.158	[M+Na]+	504.169	0	Gentianose	C18H32O16	25954-44-3		NO	metabo_info.php?molid=89696
90622	527.158	[M+Na]+	504.169	0	Fagopyritol B2	C18H32O16	116261-02-0		NO	metabo_info.php?molid=90622
93481	527.158	[M+Na]+	504.169	0	beta-D-Galactopyranosyl-(1->2)-[beta-D-galactopyranosyl-(1->4)]-D-galactose	C18H32O16	83788-45-8		NO	metabo_info.php?molid=93481
93482	527.158	[M+Na]+	504.169	0	beta-D-Galactopyranosyl-(1->4)-beta-D-galactopyranosyl-(1->4)-D-galactose	C18H32O16	6118-87-2		NO	metabo_info.php?molid=93482
93483	527.158	[M+Na]+	504.169	0	beta-D-Galactopyranosyl-(1->3)-beta-D-galactopyranosyl-(1->6)-D-galactose	C18H32O16			NO	metabo_info.php?molid=93483
94258	527.158	[M+Na]+	504.169	0	3-beta-Gentiobiosylglucose	C18H32O16	32581-32-1		NO	metabo_info.php?molid=94258
94259	527.158	[M+Na]+	504.169	0	alpha-D-Glucopyranosyl-(1->6)-alpha-D-glucopyranosyl-(1->2)-D-glucose	C18H32O16	40983-70-8		NO	metabo_info.php?molid=94259
94261	527.158	[M+Na]+	504.169	0	4-beta-Laminaribiosylglucose	C18H32O16	32581-38-7		NO	metabo_info.php?molid=94261
94262	527.158	[M+Na]+	504.169	0	alpha-D-Glucopyranosyl-(1->4)-alpha-D-glucopyranosyl-(1->6)-D-glucose	C18H32O16	32581-33-2		NO	metabo_info.php?molid=94262
94263	527.158	[M+Na]+	504.169	0	3-beta-Cellobiosylglucose	C18H32O16	32581-36-5		NO	metabo_info.php?molid=94263
94716	527.158	[M+Na]+	504.169	0	Fagopyritol A2	C18H32O16			NO	metabo_info.php?molid=94716
95425	527.158	[M+Na]+	504.169	0	Sophorotriose	C18H32O16	32581-40-1		NO	metabo_info.php?molid=95425
96189	527.158	[M+Na]+	504.169	0	nephritogenoside	C18H32O16	81276-22-4		NO	metabo_info.php?molid=96189
149878	527.158	[M+K]+	488.191	8	Gly Ser Tyr Tyr	C23H28N4O8			NO	metabo_info.php?molid=149878
151398	527.158	[M+K]+	488.191	8	Gly Tyr Ser Tyr	C23H28N4O8			NO	metabo_info.php?molid=151398
151474	527.158	[M+K]+	488.191	8	Gly Tyr Tyr Ser	C23H28N4O8			NO	metabo_info.php?molid=151474
225878	527.158	[M+K]+	488.191	8	Ser Gly Tyr Tyr	C23H28N4O8			NO	metabo_info.php?molid=225878
231198	527.158	[M+K]+	488.191	8	Ser Tyr Gly Tyr	C23H28N4O8			NO	metabo_info.php?molid=231198
231464	527.158	[M+K]+	488.191	8	Ser Tyr Tyr Gly	C23H28N4O8			NO	metabo_info.php?molid=231464
257798	527.158	[M+K]+	488.191	8	Tyr Gly Ser Tyr	C23H28N4O8			NO	metabo_info.php?molid=257798
257874	527.158	[M+K]+	488.191	8	Tyr Gly Tyr Ser	C23H28N4O8			NO	metabo_info.php?molid=257874
261598	527.158	[M+K]+	488.191	8	Tyr Ser Gly Tyr	C23H28N4O8			NO	metabo_info.php?molid=261598
261864	527.158	[M+K]+	488.191	8	Tyr Ser Tyr Gly	C23H28N4O8			NO	metabo_info.php?molid=261864
263194	527.158	[M+K]+	488.191	8	Tyr Tyr Gly Ser	C23H28N4O8			NO	metabo_info.php?molid=263194
263384	527.158	[M+K]+	488.191	8	Tyr Tyr Ser Gly	C23H28N4O8			NO	metabo_info.php?molid=263384
196112	527.158	[M+K]+	488.198	5	Asn Asn Asn Gln	C17H28N8O9			NO	metabo_info.php?molid=196112
196150	527.158	[M+K]+	488.198	5	Asn Asn Gln Asn	C17H28N8O9			NO	metabo_info.php?molid=196150
196910	527.158	[M+K]+	488.198	5	Asn Gln Asn Asn	C17H28N8O9			NO	metabo_info.php?molid=196910
212110	527.158	[M+K]+	488.198	5	Gln Asn Asn Asn	C17H28N8O9			NO	metabo_info.php?molid=212110
71943	867.24	[M+Na]+	844.243	9	Scabraside	C40H44O20	87686-79-1	C17918	NO	metabo_info.php?molid=71943
3696	867.24	[M+K]+	828.275	2	Amylopectin	C30H52O26	9037-22-3	C00317	NO	metabo_info.php?molid=3696
62890	867.24	[M+K]+	828.275	2	Maltopentaose	C30H52O26	34620-76-3		YES	metabo_info.php?molid=62890
63207	867.24	[M+K]+	828.275	2	Cellopentaose	C30H52O26		C06218	NO	metabo_info.php?molid=63207
66867	867.24	[M+K]+	828.275	2	Verbascose	C30H52O26	546-62-3	C08252	NO	metabo_info.php?molid=66867
51178	689.211	[M+Na]+	666.216	9	Quercetin 5,7,3\',4\'-tetramethyl ether 3-rutinoside	C31H38O16			NO	metabo_info.php?molid=51178
93919	689.211	[M+Na]+	666.216	9	Tetramethylquercetin 3-rutinoside	C31H38O16	58528-03-3		NO	metabo_info.php?molid=93919
4199	689.211	[M+Na]+	666.222	0	maltotetraose	C24H42O21	34612-38-9	C02052	YES	metabo_info.php?molid=4199
160	689.211	[M+Na]+	666.222	0	Glycogen	C24H42O21	9005-79-2	C00182	NO	metabo_info.php?molid=160
6951	689.211	[M+Na]+	666.222	0	Stachyose	C24H42O21	10094-58-3
63206	689.211	[M+Na]+	666.222	0	Cellotetraose	C24H42O21	38819-01-1	C02013	YES	metabo_info.php?molid=63206
66094	689.211	[M+Na]+	666.222	0	Isolychnose	C24H42O21	546-35-0	C03989	NO	metabo_info.php?molid=66094
66268	689.211	[M+Na]+	666.222	0	1,3-alpha-D-Mannosyl-1,2-alpha-D-mannosyl-1,2-alpha-D-mannosyl-D-mannose	C24H42O21		C04861	NO	metabo_info.php?molid=66268
66859	689.211	[M+Na]+	666.222	0	Lychnose	C24H42O21	512-65-2	C08242	NO	metabo_info.php?molid=66859
66864	689.211	[M+Na]+	666.222	0	Sesamose	C24H42O21	58985-23-2	C08248	NO	metabo_info.php?molid=66864
86596	689.211	[M+Na]+	666.222	0	Mannan	C24H42O21	9036-88-8		NO	metabo_info.php?molid=86596
90623	689.211	[M+Na]+	666.222	0	Fagopyritol B3	C24H42O21	208708-11-6		NO	metabo_info.php?molid=90623
93168	689.211	[M+Na]+	666.222	0	Bifurcose	C24H42O21	3568-31-8		NO	metabo_info.php?molid=93168
93497	689.211	[M+Na]+	666.222	0	Neobifurcose	C24H42O21			NO	metabo_info.php?molid=93497
93767	689.211	[M+Na]+	666.222	0	3-beta-Glucosylcellotriose	C24H42O21	58484-04-1		NO	metabo_info.php?molid=93767
93768	689.211	[M+Na]+	666.222	0	3-beta-Cellobiosylcellobiose	C24H42O21	103762-93-2		NO	metabo_info.php?molid=93768
93770	689.211	[M+Na]+	666.222	0	Nystose	C24H42O21	13133-07-8		NO	metabo_info.php?molid=93770
94717	689.211	[M+Na]+	666.222	0	Fagopyritol A3	C24H42O21			NO	metabo_info.php?molid=94717
91127	689.211	[M+K]+	650.252	4	Kuwanol E	C39H38O9	125850-38-6		NO	metabo_info.php?molid=91127
69113	689.211	[M+K]+	650.252	5	BQ 518	C32H38N6O7S		C11589	NO	metabo_info.php?molid=69113
131858	689.211	[M+K]+	650.252	5	Glu Met Trp Trp	C32H38N6O7S			NO	metabo_info.php?molid=131858
134898	689.211	[M+K]+	650.252	5	Glu Trp Met Trp	C32H38N6O7S			NO	metabo_info.php?molid=134898
135050	689.211	[M+K]+	650.252	5	Glu Trp Trp Met	C32H38N6O7S			NO	metabo_info.php?molid=135050
185057	689.211	[M+K]+	650.252	5	Met Glu Trp Trp	C32H38N6O7S			NO	metabo_info.php?molid=185057
190757	689.211	[M+K]+	650.252	5	Met Trp Glu Trp	C32H38N6O7S			NO	metabo_info.php?molid=190757
191042	689.211	[M+K]+	650.252	5	Met Trp Trp Glu	C32H38N6O7S			NO	metabo_info.php?molid=191042
248897	689.211	[M+K]+	650.252	5	Trp Glu Met Trp	C32H38N6O7S			NO	metabo_info.php?molid=248897
249049	689.211	[M+K]+	650.252	5	Trp Glu Trp Met	C32H38N6O7S			NO	metabo_info.php?molid=249049
251557	689.211	[M+K]+	650.252	5	Trp Met Glu Trp	C32H38N6O7S			NO	metabo_info.php?molid=251557
251842	689.211	[M+K]+	650.252	5	Trp Met Trp Glu	C32H38N6O7S			NO	metabo_info.php?molid=251842
254749	689.211	[M+K]+	650.252	5	Trp Trp Glu Met	C32H38N6O7S			NO	metabo_info.php?molid=254749
254882	689.211	[M+K]+	650.252	5	Trp Trp Met Glu	C32H38N6O7S			NO	metabo_info.php?molid=254882
40371	478.329	[M+H]+	477.322	0	PC(O-16:2(9E,10E)/0:0)[U]	C24H48NO6P			NO	metabo_info.php?molid=40371
46721	478.329	[M+H]+	477.322	0	PE(P-19:1(12Z)/0:0)	C24H48NO6P			NO	metabo_info.php?molid=46721
42607	478.329	[M+Na]+	455.34	0	Ecalcidene	C29H45NO3			NO	metabo_info.php?molid=42607
64649	687.176	[M+K]+	648.217	6	Caylin-2	C32H30F6N4O4	NA		YES	metabo_info.php?molid=64649
40727	758.57	[M+H]+	757.562	0	PE-NMe(18:1(9E)/18:1(9E))	C42H80NO8P			NO	metabo_info.php?molid=40727
40729	758.57	[M+H]+	757.562	0	PE-NMe(18:1(9Z)/18:1(9Z))[U]	C42H80NO8P			NO	metabo_info.php?molid=40729
40734	758.57	[M+H]+	757.562	0	PE-NMe(18:1(9Z)/18:1(9Z))	C42H80NO8P			NO	metabo_info.php?molid=40734
40746	758.57	[M+H]+	757.562	0	PE-NMe(18:1(9E)/18:1(9E))[U]	C42H80NO8P			NO	metabo_info.php?molid=40746
39327	758.57	[M+H]+	757.562	0	PC(16:0/18:2(10E,12Z))	C42H80NO8P			NO	metabo_info.php?molid=39327
39328	758.57	[M+H]+	757.562	0	PC(16:0/18:2(11Z,13Z))	C42H80NO8P			NO	metabo_info.php?molid=39328
39329	758.57	[M+H]+	757.562	0	PC(16:0/18:2(2E,4E))	C42H80NO8P			NO	metabo_info.php?molid=39329
39330	758.57	[M+H]+	757.562	0	PC(16:0/18:2(2Z,4Z))	C42H80NO8P			NO	metabo_info.php?molid=39330
39331	758.57	[M+H]+	757.562	0	PC(16:0/18:2(6Z,9Z))	C42H80NO8P			NO	metabo_info.php?molid=39331
39332	758.57	[M+H]+	757.562	0	PC(16:0/18:2(9E,11E))	C42H80NO8P			NO	metabo_info.php?molid=39332
39333	758.57	[M+H]+	757.562	0	PC(16:0/18:2(9E,11Z))	C42H80NO8P			NO	metabo_info.php?molid=39333
39334	758.57	[M+H]+	757.562	0	PC(16:0/18:2(9E,12E))	C42H80NO8P			NO	metabo_info.php?molid=39334
39335	758.57	[M+H]+	757.562	0	PC(16:0/18:2(9E,12E))[U]	C42H80NO8P			NO	metabo_info.php?molid=39335
39337	758.57	[M+H]+	757.562	0	PC(16:0/18:2(9Z,12Z))[S]	C42H80NO8P			NO	metabo_info.php?molid=39337
39338	758.57	[M+H]+	757.562	0	PC(16:0/18:2(9Z,12Z))[U]	C42H80NO8P			NO	metabo_info.php?molid=39338
39419	758.57	[M+H]+	757.562	0	PC(16:1(2Z)/18:1(9Z))	C42H80NO8P			NO	metabo_info.php?molid=39419
39421	758.57	[M+H]+	757.562	0	PC(16:1(7Z)/18:1(9Z))[U]	C42H80NO8P			NO	metabo_info.php?molid=39421
39430	758.57	[M+H]+	757.562	0	PC(16:1(9Z)/18:1(9Z))[U]	C42H80NO8P			NO	metabo_info.php?molid=39430
39467	758.57	[M+H]+	757.562	0	PC(17:1(10E)/17:1(10E))[U]	C42H80NO8P			NO	metabo_info.php?molid=39467
39468	758.57	[M+H]+	757.562	0	PC(17:1(10Z)/17:1(10Z))	C42H80NO8P			NO	metabo_info.php?molid=39468
39469	758.57	[M+H]+	757.562	0	PC(17:1(9Z)/17:1(9Z))	C42H80NO8P			NO	metabo_info.php?molid=39469
39486	758.57	[M+H]+	757.562	0	PC(18:0/16:2(2E,4E))	C42H80NO8P			NO	metabo_info.php?molid=39486
39627	758.57	[M+H]+	757.562	0	PC(18:1(9Z)/16:1(3E))[U]	C42H80NO8P			NO	metabo_info.php?molid=39627
39661	758.57	[M+H]+	757.562	0	PC(18:2(2E,4E)/16:0)	C42H80NO8P			NO	metabo_info.php?molid=39661
39667	758.57	[M+H]+	757.562	0	PC(18:2(6Z,9Z)/16:0)	C42H80NO8P			NO	metabo_info.php?molid=39667
39674	758.57	[M+H]+	757.562	0	PC(18:2(9Z,12Z)/16:0)[U]	C42H80NO8P			NO	metabo_info.php?molid=39674
59330	758.57	[M+H]+	757.562	0	PC(14:0/20:2(11Z,14Z))	C42H80NO8P		C00157	NO	metabo_info.php?molid=59330
59362	758.57	[M+H]+	757.562	0	PC(14:1(9Z)/20:1(11Z))	C42H80NO8P		C00157	NO	metabo_info.php?molid=59362
59422	758.57	[M+H]+	757.562	0	PC(16:0/18:2(9Z,12Z))	C42H80NO8P		C00157	NO	metabo_info.php?molid=59422
59452	758.57	[M+H]+	757.562	0	PC(16:1(9Z)/18:1(11Z))	C42H80NO8P		C00157	NO	metabo_info.php?molid=59452
59453	758.57	[M+H]+	757.562	0	PC(16:1(9Z)/18:1(9Z))	C42H80NO8P		C00157	NO	metabo_info.php?molid=59453
59515	758.57	[M+H]+	757.562	0	PC(18:1(11Z)/16:1(9Z))	C42H80NO8P		C00157	NO	metabo_info.php?molid=59515
59548	758.57	[M+H]+	757.562	0	PC(18:1(9Z)/16:1(9Z))	C42H80NO8P		C00157	NO	metabo_info.php?molid=59548
59579	758.57	[M+H]+	757.562	0	PC(18:2(9Z,12Z)/16:0)	C42H80NO8P		C00157	NO	metabo_info.php?molid=59579
59742	758.57	[M+H]+	757.562	0	PC(20:1(11Z)/14:1(9Z))	C42H80NO8P		C00157	NO	metabo_info.php?molid=59742
59774	758.57	[M+H]+	757.562	0	PC(20:2(11Z,14Z)/14:0)	C42H80NO8P		C00157	NO	metabo_info.php?molid=59774
60352	758.57	[M+H]+	757.562	0	PE(15:0/22:2(13Z,16Z))	C42H80NO8P		C00350	NO	metabo_info.php?molid=60352
60938	758.57	[M+H]+	757.562	0	PE(22:2(13Z,16Z)/15:0)	C42H80NO8P		C00350	NO	metabo_info.php?molid=60938
75616	758.57	[M+H]+	757.562	0	PC(12:0/22:2(13Z,16Z))	C42H80NO8P			NO	metabo_info.php?molid=75616
75729	758.57	[M+H]+	757.562	0	PC(15:1(9Z)/19:1(9Z))	C42H80NO8P			NO	metabo_info.php?molid=75729
75784	758.57	[M+H]+	757.562	0	PC(17:0/17:2(9Z,12Z))	C42H80NO8P			NO	metabo_info.php?molid=75784
75839	758.57	[M+H]+	757.562	0	PC(17:2(9Z,12Z)/17:0)	C42H80NO8P			NO	metabo_info.php?molid=75839
76041	758.57	[M+H]+	757.562	0	PC(19:1(9Z)/15:1(9Z))	C42H80NO8P			NO	metabo_info.php?molid=76041
76315	758.57	[M+H]+	757.562	0	PC(22:2(13Z,16Z)/12:0)	C42H80NO8P			NO	metabo_info.php?molid=76315
76736	758.57	[M+H]+	757.562	0	PE(15:1(9Z)/22:1(11Z))	C42H80NO8P			NO	metabo_info.php?molid=76736
76788	758.57	[M+H]+	757.562	0	PE(17:0/20:2(11Z,14Z))	C42H80NO8P			NO	metabo_info.php?molid=76788
76815	758.57	[M+H]+	757.562	0	PE(17:1(9Z)/20:1(11Z))	C42H80NO8P			NO	metabo_info.php?molid=76815
76844	758.57	[M+H]+	757.562	0	PE(17:2(9Z,12Z)/20:0)	C42H80NO8P			NO	metabo_info.php?molid=76844
76881	758.57	[M+H]+	757.562	0	PE(18:1(9Z)/19:1(9Z))	C42H80NO8P			NO	metabo_info.php?molid=76881
76902	758.57	[M+H]+	757.562	0	PE(18:2(9Z,12Z)/19:0)	C42H80NO8P			NO	metabo_info.php?molid=76902
77011	758.57	[M+H]+	757.562	0	PE(19:0/18:2(9Z,12Z))	C42H80NO8P			NO	metabo_info.php?molid=77011
77040	758.57	[M+H]+	757.562	0	PE(19:1(9Z)/18:1(9Z))	C42H80NO8P			NO	metabo_info.php?molid=77040
77065	758.57	[M+H]+	757.562	0	PE(20:0/17:2(9Z,12Z))	C42H80NO8P			NO	metabo_info.php?molid=77065
77085	758.57	[M+H]+	757.562	0	PE(20:1(11Z)/17:1(9Z))	C42H80NO8P			NO	metabo_info.php?molid=77085
77114	758.57	[M+H]+	757.562	0	PE(20:2(11Z,14Z)/17:0)	C42H80NO8P			NO	metabo_info.php?molid=77114
77280	758.57	[M+H]+	757.562	0	PE(22:1(11Z)/15:1(9Z))	C42H80NO8P			NO	metabo_info.php?molid=77280
36806	893.703	[M+K]+	854.736	4	TG(17:2(9Z,12Z)/17:2(9Z,12Z)/18:0)[iso3]	C55H98O6			NO	metabo_info.php?molid=36806
4818	893.703	[M+K]+	854.736	4	TG(17:1(9Z)/17:2(9Z,12Z)/18:1(9Z))[iso6]	C55H98O6			NO	metabo_info.php?molid=4818
4820	893.703	[M+K]+	854.736	4	TG(17:0/17:2(9Z,12Z)/18:2(9Z,12Z))[iso6]	C55H98O6			NO	metabo_info.php?molid=4820
4821	893.703	[M+K]+	854.736	4	TG(17:1(9Z)/17:1(9Z)/18:2(9Z,12Z))[iso3]	C55H98O6			NO	metabo_info.php?molid=4821
4824	893.703	[M+K]+	854.736	4	TG(17:0/17:1(9Z)/18:3(9Z,12Z,15Z))[iso6]	C55H98O6			NO	metabo_info.php?molid=4824
4838	893.703	[M+K]+	854.736	4	TG(16:0/18:2(9Z,12Z)/18:2(9Z,12Z))[iso3]	C55H98O6			NO	metabo_info.php?molid=4838
4839	893.703	[M+K]+	854.736	4	TG(16:1(9Z)/18:1(9Z)/18:2(9Z,12Z))[iso6]	C55H98O6			NO	metabo_info.php?molid=4839
4842	893.703	[M+K]+	854.736	4	TG(16:0/18:1(9Z)/18:3(9Z,12Z,15Z))[iso6]	C55H98O6			NO	metabo_info.php?molid=4842
4843	893.703	[M+K]+	854.736	4	TG(16:1(9Z)/18:0/18:3(9Z,12Z,15Z))[iso6]	C55H98O6			NO	metabo_info.php?molid=4843
4854	893.703	[M+K]+	854.736	4	TG(16:1(9Z)/16:1(9Z)/20:2(11Z,14Z))[iso3]	C55H98O6			NO	metabo_info.php?molid=4854
4855	893.703	[M+K]+	854.736	4	TG(16:0/16:1(9Z)/20:3(8Z,11Z,14Z))[iso6]	C55H98O6			NO	metabo_info.php?molid=4855
4856	893.703	[M+K]+	854.736	4	TG(16:0/16:0/20:4(5Z,8Z,11Z,14Z))[iso3]	C55H98O6			NO	metabo_info.php?molid=4856
61746	893.703	[M+K]+	854.736	4	TG(18:1(11Z)/16:0/18:3(9Z,12Z,15Z))[iso6]	C55H98O6			NO	metabo_info.php?molid=61746
61750	893.703	[M+K]+	854.736	4	TG(18:1(11Z)/16:1(9Z)/18:2(9Z,12Z))[iso6]	C55H98O6			NO	metabo_info.php?molid=61750
61757	893.703	[M+K]+	854.736	4	TG(18:1(9Z)/16:0/18:3(9Z,12Z,15Z))[iso6]	C55H98O6			NO	metabo_info.php?molid=61757
87420	893.703	[M+K]+	854.736	4	Glycerol 1,2-di-(9Z,12Z-octadecadienoate) 3-hexadecanoate	C55H98O6	26836-36-2		NO	metabo_info.php?molid=87420
87421	893.703	[M+K]+	854.736	4	Glycerol 1,3-di-(9Z,12Z-octadecadienoate) 2-hexadecanoate	C55H98O6	2190-16-1		NO	metabo_info.php?molid=87421
98538	893.703	[M+K]+	854.736	4	TG(12:0/20:2(11Z,14Z)/20:2(11Z,14Z))[iso3]	C55H98O6			NO	metabo_info.php?molid=98538
98755	893.703	[M+K]+	854.736	4	TG(15:0/15:0/22:4(7Z,10Z,13Z,16Z))[iso3]	C55H98O6			NO	metabo_info.php?molid=98755
98806	893.703	[M+K]+	854.736	4	TG(15:1(9Z)/15:1(9Z)/22:2(13Z,16Z))[iso3]	C55H98O6			NO	metabo_info.php?molid=98806
98855	893.703	[M+K]+	854.736	4	TG(17:0/17:0/18:4(6Z,9Z,12Z,15Z))[iso3]	C55H98O6			NO	metabo_info.php?molid=98855
99314	893.703	[M+K]+	854.736	4	TG(12:0/18:0/22:4(7Z,10Z,13Z,16Z))[iso6]	C55H98O6			NO	metabo_info.php?molid=99314
99333	893.703	[M+K]+	854.736	4	TG(12:0/18:1(9Z)/22:3(10Z,13Z,16Z))[iso6]	C55H98O6			NO	metabo_info.php?molid=99333
99351	893.703	[M+K]+	854.736	4	TG(12:0/18:2(9Z,12Z)/22:2(13Z,16Z))[iso6]	C55H98O6			NO	metabo_info.php?molid=99351
99368	893.703	[M+K]+	854.736	4	TG(12:0/18:3(6Z,9Z,12Z)/22:1(11Z))[iso6]	C55H98O6			NO	metabo_info.php?molid=99368
99385	893.703	[M+K]+	854.736	4	TG(12:0/18:3(9Z,12Z,15Z)/22:1(11Z))[iso6]	C55H98O6			NO	metabo_info.php?molid=99385
99400	893.703	[M+K]+	854.736	4	TG(12:0/18:4(6Z,9Z,12Z,15Z)/22:0)[iso6]	C55H98O6			NO	metabo_info.php?molid=99400
99439	893.703	[M+K]+	854.736	4	TG(12:0/20:0/20:4(5Z,8Z,11Z,14Z))[iso6]	C55H98O6			NO	metabo_info.php?molid=99439
99450	893.703	[M+K]+	854.736	4	TG(12:0/20:1(11Z)/20:3(8Z,11Z,14Z))[iso6]	C55H98O6			NO	metabo_info.php?molid=99450
99713	893.703	[M+K]+	854.736	4	TG(13:0/17:0/22:4(7Z,10Z,13Z,16Z))[iso6]	C55H98O6			NO	metabo_info.php?molid=99713
99735	893.703	[M+K]+	854.736	4	TG(13:0/17:1(9Z)/22:3(10Z,13Z,16Z))[iso6]	C55H98O6			NO	metabo_info.php?molid=99735
99756	893.703	[M+K]+	854.736	4	TG(13:0/17:2(9Z,12Z)/22:2(13Z,16Z))[iso6]	C55H98O6			NO	metabo_info.php?molid=99756
99864	893.703	[M+K]+	854.736	4	TG(13:0/18:4(6Z,9Z,12Z,15Z)/21:0)[iso6]	C55H98O6			NO	metabo_info.php?molid=99864
99877	893.703	[M+K]+	854.736	4	TG(13:0/19:0/20:4(5Z,8Z,11Z,14Z))[iso6]	C55H98O6			NO	metabo_info.php?molid=99877
99890	893.703	[M+K]+	854.736	4	TG(13:0/19:1(9Z)/20:3(8Z,11Z,14Z))[iso6]	C55H98O6			NO	metabo_info.php?molid=99890
100099	893.703	[M+K]+	854.736	4	TG(14:0/16:0/22:4(7Z,10Z,13Z,16Z))[iso6]	C55H98O6			NO	metabo_info.php?molid=100099
100123	893.703	[M+K]+	854.736	4	TG(14:0/16:1(9Z)/22:3(10Z,13Z,16Z))[iso6]	C55H98O6			NO	metabo_info.php?molid=100123
100207	893.703	[M+K]+	854.736	4	TG(14:0/18:0/20:4(5Z,8Z,11Z,14Z))[iso6]	C55H98O6			NO	metabo_info.php?molid=100207
100226	893.703	[M+K]+	854.736	4	TG(14:0/18:1(9Z)/20:3(8Z,11Z,14Z))[iso6]	C55H98O6			NO	metabo_info.php?molid=100226
100244	893.703	[M+K]+	854.736	4	TG(14:0/18:2(9Z,12Z)/20:2(11Z,14Z))[iso6]	C55H98O6			NO	metabo_info.php?molid=100244
100261	893.703	[M+K]+	854.736	4	TG(14:0/18:3(6Z,9Z,12Z)/20:1(11Z))[iso6]	C55H98O6			NO	metabo_info.php?molid=100261
100278	893.703	[M+K]+	854.736	4	TG(14:0/18:3(9Z,12Z,15Z)/20:1(11Z))[iso6]	C55H98O6			NO	metabo_info.php?molid=100278
100293	893.703	[M+K]+	854.736	4	TG(14:0/18:4(6Z,9Z,12Z,15Z)/20:0)[iso6]	C55H98O6			NO	metabo_info.php?molid=100293
100504	893.703	[M+K]+	854.736	4	TG(14:1(9Z)/16:0/22:3(10Z,13Z,16Z))[iso6]	C55H98O6			NO	metabo_info.php?molid=100504
100528	893.703	[M+K]+	854.736	4	TG(14:1(9Z)/16:1(9Z)/22:2(13Z,16Z))[iso6]	C55H98O6			NO	metabo_info.php?molid=100528
100612	893.703	[M+K]+	854.736	4	TG(14:1(9Z)/18:0/20:3(8Z,11Z,14Z))[iso6]	C55H98O6			NO	metabo_info.php?molid=100612
100631	893.703	[M+K]+	854.736	4	TG(14:1(9Z)/18:1(9Z)/20:2(11Z,14Z))[iso6]	C55H98O6			NO	metabo_info.php?molid=100631
100649	893.703	[M+K]+	854.736	4	TG(14:1(9Z)/18:2(9Z,12Z)/20:1(11Z))[iso6]	C55H98O6			NO	metabo_info.php?molid=100649
100666	893.703	[M+K]+	854.736	4	TG(14:1(9Z)/18:3(6Z,9Z,12Z)/20:0)[iso6]	C55H98O6			NO	metabo_info.php?molid=100666
100683	893.703	[M+K]+	854.736	4	TG(14:1(9Z)/18:3(9Z,12Z,15Z)/20:0)[iso6]	C55H98O6			NO	metabo_info.php?molid=100683
100856	893.703	[M+K]+	854.736	4	TG(15:0/15:1(9Z)/22:3(10Z,13Z,16Z))[iso6]	C55H98O6			NO	metabo_info.php?molid=100856
100922	893.703	[M+K]+	854.736	4	TG(15:0/17:0/20:4(5Z,8Z,11Z,14Z))[iso6]	C55H98O6			NO	metabo_info.php?molid=100922
100944	893.703	[M+K]+	854.736	4	TG(15:0/17:1(9Z)/20:3(8Z,11Z,14Z))[iso6]	C55H98O6			NO	metabo_info.php?molid=100944
100965	893.703	[M+K]+	854.736	4	TG(15:0/17:2(9Z,12Z)/20:2(11Z,14Z))[iso6]	C55H98O6			NO	metabo_info.php?molid=100965
101036	893.703	[M+K]+	854.736	4	TG(15:0/18:3(6Z,9Z,12Z)/19:1(9Z))[iso6]	C55H98O6			NO	metabo_info.php?molid=101036
101053	893.703	[M+K]+	854.736	4	TG(15:0/18:3(9Z,12Z,15Z)/19:1(9Z))[iso6]	C55H98O6			NO	metabo_info.php?molid=101053
101068	893.703	[M+K]+	854.736	4	TG(15:0/18:4(6Z,9Z,12Z,15Z)/19:0)[iso6]	C55H98O6			NO	metabo_info.php?molid=101068
101268	893.703	[M+K]+	854.736	4	TG(15:1(9Z)/17:0/20:3(8Z,11Z,14Z))[iso6]	C55H98O6			NO	metabo_info.php?molid=101268
101290	893.703	[M+K]+	854.736	4	TG(15:1(9Z)/17:1(9Z)/20:2(11Z,14Z))[iso6]	C55H98O6			NO	metabo_info.php?molid=101290
101311	893.703	[M+K]+	854.736	4	TG(15:1(9Z)/17:2(9Z,12Z)/20:1(11Z))[iso6]	C55H98O6			NO	metabo_info.php?molid=101311
101369	893.703	[M+K]+	854.736	4	TG(15:1(9Z)/18:2(9Z,12Z)/19:1(9Z))[iso6]	C55H98O6			NO	metabo_info.php?molid=101369
101386	893.703	[M+K]+	854.736	4	TG(15:1(9Z)/18:3(6Z,9Z,12Z)/19:0)[iso6]	C55H98O6			NO	metabo_info.php?molid=101386
101403	893.703	[M+K]+	854.736	4	TG(15:1(9Z)/18:3(9Z,12Z,15Z)/19:0)[iso6]	C55H98O6			NO	metabo_info.php?molid=101403
101572	893.703	[M+K]+	854.736	4	TG(16:0/18:0/18:4(6Z,9Z,12Z,15Z))[iso6]	C55H98O6			NO	metabo_info.php?molid=101572
101575	893.703	[M+K]+	854.736	4	TG(16:0/18:1(9Z)/18:3(6Z,9Z,12Z))[iso6]	C55H98O6			NO	metabo_info.php?molid=101575
101660	893.703	[M+K]+	854.736	4	TG(16:1(9Z)/17:2(9Z,12Z)/19:1(9Z))[iso6]	C55H98O6			NO	metabo_info.php?molid=101660
101662	893.703	[M+K]+	854.736	4	TG(16:1(9Z)/18:0/18:3(6Z,9Z,12Z))[iso6]	C55H98O6			NO	metabo_info.php?molid=101662
101741	893.703	[M+K]+	854.736	4	TG(17:0/17:1(9Z)/18:3(6Z,9Z,12Z))[iso6]	C55H98O6			NO	metabo_info.php?molid=101741
159057	752.276	[M+K]+	713.307	6	His Trp Trp Trp	C39H39N9O5			NO	metabo_info.php?molid=159057
250257	752.276	[M+K]+	713.307	6	Trp His Trp Trp	C39H39N9O5			NO	metabo_info.php?molid=250257
254817	752.276	[M+K]+	713.307	6	Trp Trp His Trp	C39H39N9O5			NO	metabo_info.php?molid=254817
255045	752.276	[M+K]+	713.307	6	Trp Trp Trp His	C39H39N9O5			NO	metabo_info.php?molid=255045
93185	525.122	[M+H]+	524.111	7	Rheidin A	C30H20O9			NO	metabo_info.php?molid=93185
51458	525.122	[M+H]+	524.117	3	5,7,2\',3\',4\'-Pentahydroxy-3,6-dimethoxyflavone 7-glucoside	C23H24O14			NO	metabo_info.php?molid=51458
111970	525.122	[M+Na]+	502.138	9	Cys Cys Phe Met	C20H30N4O5S3			NO	metabo_info.php?molid=111970
112084	525.122	[M+Na]+	502.138	9	Cys Cys Met Phe	C20H30N4O5S3			NO	metabo_info.php?molid=112084
113110	525.122	[M+Na]+	502.138	9	Cys Phe Cys Met	C20H30N4O5S3			NO	metabo_info.php?molid=113110
113281	525.122	[M+Na]+	502.138	9	Cys Phe Met Cys	C20H30N4O5S3			NO	metabo_info.php?molid=113281
115504	525.122	[M+Na]+	502.138	9	Cys Met Cys Phe	C20H30N4O5S3			NO	metabo_info.php?molid=115504
115561	525.122	[M+Na]+	502.138	9	Cys Met Phe Cys	C20H30N4O5S3			NO	metabo_info.php?molid=115561
135910	525.122	[M+Na]+	502.138	9	Phe Cys Cys Met	C20H30N4O5S3			NO	metabo_info.php?molid=135910
136081	525.122	[M+Na]+	502.138	9	Phe Cys Met Cys	C20H30N4O5S3			NO	metabo_info.php?molid=136081
139500	525.122	[M+Na]+	502.138	9	Phe Met Cys Cys	C20H30N4O5S3			NO	metabo_info.php?molid=139500
183903	525.122	[M+Na]+	502.138	9	Met Cys Cys Phe	C20H30N4O5S3			NO	metabo_info.php?molid=183903
183960	525.122	[M+Na]+	502.138	9	Met Cys Phe Cys	C20H30N4O5S3			NO	metabo_info.php?molid=183960
185100	525.122	[M+Na]+	502.138	9	Met Phe Cys Cys	C20H30N4O5S3			NO	metabo_info.php?molid=185100
104099	525.122	[M+K]+	486.161	3	Ala Cys Met Tyr	C20H30N4O6S2			NO	metabo_info.php?molid=104099
104270	525.122	[M+K]+	486.161	3	Ala Cys Tyr Met	C20H30N4O6S2			NO	metabo_info.php?molid=104270
107519	525.122	[M+K]+	486.161	3	Ala Met Cys Tyr	C20H30N4O6S2			NO	metabo_info.php?molid=107519
107861	525.122	[M+K]+	486.161	3	Ala Met Tyr Cys	C20H30N4O6S2			NO	metabo_info.php?molid=107861
111110	525.122	[M+K]+	486.161	3	Ala Tyr Cys Met	C20H30N4O6S2			NO	metabo_info.php?molid=111110
111281	525.122	[M+K]+	486.161	3	Ala Tyr Met Cys	C20H30N4O6S2			NO	metabo_info.php?molid=111281
111699	525.122	[M+K]+	486.161	3	Cys Ala Met Tyr	C20H30N4O6S2			NO	metabo_info.php?molid=111699
111870	525.122	[M+K]+	486.161	3	Cys Ala Tyr Met	C20H30N4O6S2			NO	metabo_info.php?molid=111870
112239	525.122	[M+K]+	486.161	3	Cys Cys Val Tyr	C20H30N4O6S2			NO	metabo_info.php?molid=112239
112277	525.122	[M+K]+	486.161	3	Cys Cys Tyr Val	C20H30N4O6S2			NO	metabo_info.php?molid=112277
113295	525.122	[M+K]+	486.161	3	Cys Phe Met Ser	C20H30N4O6S2			NO	metabo_info.php?molid=113295
113390	525.122	[M+K]+	486.161	3	Cys Phe Ser Met	C20H30N4O6S2			NO	metabo_info.php?molid=113390
115499	525.122	[M+K]+	486.161	3	Cys Met Ala Tyr	C20H30N4O6S2			NO	metabo_info.php?molid=115499
115575	525.122	[M+K]+	486.161	3	Cys Met Phe Ser	C20H30N4O6S2			NO	metabo_info.php?molid=115575
115784	525.122	[M+K]+	486.161	3	Cys Met Ser Phe	C20H30N4O6S2			NO	metabo_info.php?molid=115784
115860	525.122	[M+K]+	486.161	3	Cys Met Tyr Ala	C20H30N4O6S2			NO	metabo_info.php?molid=115860
117570	525.122	[M+K]+	486.161	3	Cys Ser Phe Met	C20H30N4O6S2			NO	metabo_info.php?molid=117570
117684	525.122	[M+K]+	486.161	3	Cys Ser Met Phe	C20H30N4O6S2			NO	metabo_info.php?molid=117684
118319	525.122	[M+K]+	486.161	3	Cys Val Cys Tyr	C20H30N4O6S2			NO	metabo_info.php?molid=118319
118661	525.122	[M+K]+	486.161	3	Cys Val Tyr Cys	C20H30N4O6S2			NO	metabo_info.php?molid=118661
119090	525.122	[M+K]+	486.161	3	Cys Tyr Ala Met	C20H30N4O6S2			NO	metabo_info.php?molid=119090
119117	525.122	[M+K]+	486.161	3	Cys Tyr Cys Val	C20H30N4O6S2			NO	metabo_info.php?molid=119117
119280	525.122	[M+K]+	486.161	3	Cys Tyr Met Ala	C20H30N4O6S2			NO	metabo_info.php?molid=119280
119421	525.122	[M+K]+	486.161	3	Cys Tyr Val Cys	C20H30N4O6S2			NO	metabo_info.php?molid=119421
136095	525.122	[M+K]+	486.161	3	Phe Cys Met Ser	C20H30N4O6S2			NO	metabo_info.php?molid=136095
136190	525.122	[M+K]+	486.161	3	Phe Cys Ser Met	C20H30N4O6S2			NO	metabo_info.php?molid=136190
139514	525.122	[M+K]+	486.161	3	Phe Met Cys Ser	C20H30N4O6S2			NO	metabo_info.php?molid=139514
139780	525.122	[M+K]+	486.161	3	Phe Met Ser Cys	C20H30N4O6S2			NO	metabo_info.php?molid=139780
141509	525.122	[M+K]+	486.161	3	Phe Ser Cys Met	C20H30N4O6S2			NO	metabo_info.php?molid=141509
141680	525.122	[M+K]+	486.161	3	Phe Ser Met Cys	C20H30N4O6S2			NO	metabo_info.php?molid=141680
183518	525.122	[M+K]+	486.161	3	Met Ala Cys Tyr	C20H30N4O6S2			NO	metabo_info.php?molid=183518
183860	525.122	[M+K]+	486.161	3	Met Ala Tyr Cys	C20H30N4O6S2			NO	metabo_info.php?molid=183860
183898	525.122	[M+K]+	486.161	3	Met Cys Ala Tyr	C20H30N4O6S2			NO	metabo_info.php?molid=183898
183974	525.122	[M+K]+	486.161	3	Met Cys Phe Ser	C20H30N4O6S2			NO	metabo_info.php?molid=183974
184183	525.122	[M+K]+	486.161	3	Met Cys Ser Phe	C20H30N4O6S2			NO	metabo_info.php?molid=184183
184259	525.122	[M+K]+	486.161	3	Met Cys Tyr Ala	C20H30N4O6S2			NO	metabo_info.php?molid=184259
185114	525.122	[M+K]+	486.161	3	Met Phe Cys Ser	C20H30N4O6S2			NO	metabo_info.php?molid=185114
185380	525.122	[M+K]+	486.161	3	Met Phe Ser Cys	C20H30N4O6S2			NO	metabo_info.php?molid=185380
189503	525.122	[M+K]+	486.161	3	Met Ser Cys Phe	C20H30N4O6S2			NO	metabo_info.php?molid=189503
189560	525.122	[M+K]+	486.161	3	Met Ser Phe Cys	C20H30N4O6S2			NO	metabo_info.php?molid=189560
191080	525.122	[M+K]+	486.161	3	Met Tyr Ala Cys	C20H30N4O6S2			NO	metabo_info.php?molid=191080
191099	525.122	[M+K]+	486.161	3	Met Tyr Cys Ala	C20H30N4O6S2			NO	metabo_info.php?molid=191099
223969	525.122	[M+K]+	486.161	3	Ser Cys Phe Met	C20H30N4O6S2			NO	metabo_info.php?molid=223969
224083	525.122	[M+K]+	486.161	3	Ser Cys Met Phe	C20H30N4O6S2			NO	metabo_info.php?molid=224083
225109	525.122	[M+K]+	486.161	3	Ser Phe Cys Met	C20H30N4O6S2			NO	metabo_info.php?molid=225109
225280	525.122	[M+K]+	486.161	3	Ser Phe Met Cys	C20H30N4O6S2			NO	metabo_info.php?molid=225280
227503	525.122	[M+K]+	486.161	3	Ser Met Cys Phe	C20H30N4O6S2			NO	metabo_info.php?molid=227503
227560	525.122	[M+K]+	486.161	3	Ser Met Phe Cys	C20H30N4O6S2			NO	metabo_info.php?molid=227560
239918	525.122	[M+K]+	486.161	3	Val Cys Cys Tyr	C20H30N4O6S2			NO	metabo_info.php?molid=239918
240260	525.122	[M+K]+	486.161	3	Val Cys Tyr Cys	C20H30N4O6S2			NO	metabo_info.php?molid=240260
247100	525.122	[M+K]+	486.161	3	Val Tyr Cys Cys	C20H30N4O6S2			NO	metabo_info.php?molid=247100
255509	525.122	[M+K]+	486.161	3	Tyr Ala Cys Met	C20H30N4O6S2			NO	metabo_info.php?molid=255509
255680	525.122	[M+K]+	486.161	3	Tyr Ala Met Cys	C20H30N4O6S2			NO	metabo_info.php?molid=255680
255889	525.122	[M+K]+	486.161	3	Tyr Cys Ala Met	C20H30N4O6S2			NO	metabo_info.php?molid=255889
255916	525.122	[M+K]+	486.161	3	Tyr Cys Cys Val	C20H30N4O6S2			NO	metabo_info.php?molid=255916
256079	525.122	[M+K]+	486.161	3	Tyr Cys Met Ala	C20H30N4O6S2			NO	metabo_info.php?molid=256079
256220	525.122	[M+K]+	486.161	3	Tyr Cys Val Cys	C20H30N4O6S2			NO	metabo_info.php?molid=256220
259480	525.122	[M+K]+	486.161	3	Tyr Met Ala Cys	C20H30N4O6S2			NO	metabo_info.php?molid=259480
259499	525.122	[M+K]+	486.161	3	Tyr Met Cys Ala	C20H30N4O6S2			NO	metabo_info.php?molid=259499
262300	525.122	[M+K]+	486.161	3	Tyr Val Cys Cys	C20H30N4O6S2			NO	metabo_info.php?molid=262300
40368	502.329	[M+Na]+	479.338	5	PC(O-16:1(9E)/0:0)[U]	C24H50NO6P			NO	metabo_info.php?molid=40368
40370	502.329	[M+Na]+	479.338	5	PC(O-16:1(9Z)/0:0)[U]	C24H50NO6P			NO	metabo_info.php?molid=40370
40400	502.329	[M+Na]+	479.338	5	PC(O-16:1(1E)/0:0)	C24H50NO6P			NO	metabo_info.php?molid=40400
40401	502.329	[M+Na]+	479.338	5	PC(O-16:1(1E)/0:0)[U]	C24H50NO6P			NO	metabo_info.php?molid=40401
40402	502.329	[M+Na]+	479.338	5	PC(P-16:0/0:0)	C24H50NO6P			NO	metabo_info.php?molid=40402
61716	502.329	[M+Na]+	479.338	5	LysoPC(P-16:0)	C24H50NO6P		C04230	NO	metabo_info.php?molid=61716
76579	502.329	[M+Na]+	479.338	5	PC(O-16:1(11Z)/0:0)	C24H50NO6P			NO	metabo_info.php?molid=76579
76580	502.329	[M+Na]+	479.338	5	PC(O-16:1(9E)/0:0)	C24H50NO6P			NO	metabo_info.php?molid=76580
76581	502.329	[M+Na]+	479.338	5	PC(O-16:1(9Z)/0:0)	C24H50NO6P			NO	metabo_info.php?molid=76581
71349	849.23	[M+H]+	848.216	7	Sennoside C	C42H40O19	37271-16-2	C16797	NO	metabo_info.php?molid=71349
71350	849.23	[M+H]+	848.216	7	Sennoside D	C42H40O19	37271-17-3	C16798	NO	metabo_info.php?molid=71350
66546	849.23	[M+Na]+	826.243	2	Pradimicin C	C39H42N2O18	116249-66-2	C06786	NO	metabo_info.php?molid=66546
3696	851.265	[M+Na]+	828.275	1	Amylopectin	C30H52O26	9037-22-3	C00317	NO	metabo_info.php?molid=3696
62890	851.265	[M+Na]+	828.275	1	Maltopentaose	C30H52O26	34620-76-3		YES	metabo_info.php?molid=62890
63207	851.265	[M+Na]+	828.275	1	Cellopentaose	C30H52O26		C06218	NO	metabo_info.php?molid=63207
66867	851.265	[M+Na]+	828.275	1	Verbascose	C30H52O26	546-62-3	C08252	NO	metabo_info.php?molid=66867
95454	935.439	[M+K]+	896.477	0	Momordin Ie	C46H72O17	96158-13-3		NO	metabo_info.php?molid=95454
149378	551.309	[M+H]+	550.298	8	Gly Arg Arg Tyr	C23H38N10O6			NO	metabo_info.php?molid=149378
149473	551.309	[M+H]+	550.298	8	Gly Arg Tyr Arg	C23H38N10O6			NO	metabo_info.php?molid=149473
151373	551.309	[M+H]+	550.298	8	Gly Tyr Arg Arg	C23H38N10O6			NO	metabo_info.php?molid=151373
217778	551.309	[M+H]+	550.298	8	Arg Gly Arg Tyr	C23H38N10O6			NO	metabo_info.php?molid=217778
217873	551.309	[M+H]+	550.298	8	Arg Gly Tyr Arg	C23H38N10O6			NO	metabo_info.php?molid=217873
221198	551.309	[M+H]+	550.298	8	Arg Arg Gly Tyr	C23H38N10O6			NO	metabo_info.php?molid=221198
221464	551.309	[M+H]+	550.298	8	Arg Arg Tyr Gly	C23H38N10O6			NO	metabo_info.php?molid=221464
223193	551.309	[M+H]+	550.298	8	Arg Tyr Gly Arg	C23H38N10O6			NO	metabo_info.php?molid=223193
223364	551.309	[M+H]+	550.298	8	Arg Tyr Arg Gly	C23H38N10O6			NO	metabo_info.php?molid=223364
257773	551.309	[M+H]+	550.298	8	Tyr Gly Arg Arg	C23H38N10O6			NO	metabo_info.php?molid=257773
261193	551.309	[M+H]+	550.298	8	Tyr Arg Gly Arg	C23H38N10O6			NO	metabo_info.php?molid=261193
261364	551.309	[M+H]+	550.298	8	Tyr Arg Arg Gly	C23H38N10O6			NO	metabo_info.php?molid=261364
66900	551.309	[M+H]+	550.302	1	Hordatine A	C28H38N8O4	7073-64-5	C08307	NO	metabo_info.php?molid=66900
52046	551.309	[M+Na]+	528.324	6	Neolinderachalcone	C35H44O4			NO	metabo_info.php?molid=52046
52700	551.309	[M+Na]+	528.324	6	Neolinderatone	C35H44O4			NO	metabo_info.php?molid=52700
162933	551.309	[M+K]+	512.343	5	Ile Lys Pro Arg	C23H44N8O5			NO	metabo_info.php?molid=162933
162971	551.309	[M+K]+	512.343	5	Ile Lys Arg Pro	C23H44N8O5			NO	metabo_info.php?molid=162971
164453	551.309	[M+K]+	512.343	5	Ile Pro Lys Arg	C23H44N8O5			NO	metabo_info.php?molid=164453
164567	551.309	[M+K]+	512.343	5	Ile Pro Arg Lys	C23H44N8O5			NO	metabo_info.php?molid=164567
165251	551.309	[M+K]+	512.343	5	Ile Arg Lys Pro	C23H44N8O5			NO	metabo_info.php?molid=165251
165327	551.309	[M+K]+	512.343	5	Ile Arg Pro Lys	C23H44N8O5			NO	metabo_info.php?molid=165327
170533	551.309	[M+K]+	512.343	5	Lys Ile Pro Arg	C23H44N8O5			NO	metabo_info.php?molid=170533
170571	551.309	[M+K]+	512.343	5	Lys Ile Arg Pro	C23H44N8O5			NO	metabo_info.php?molid=170571
171333	551.309	[M+K]+	512.343	5	Lys Leu Pro Arg	C23H44N8O5			NO	metabo_info.php?molid=171333
171371	551.309	[M+K]+	512.343	5	Lys Leu Arg Pro	C23H44N8O5			NO	metabo_info.php?molid=171371
172433	551.309	[M+K]+	512.343	5	Lys Pro Ile Arg	C23H44N8O5			NO	metabo_info.php?molid=172433
172473	551.309	[M+K]+	512.343	5	Lys Pro Leu Arg	C23H44N8O5			NO	metabo_info.php?molid=172473
172566	551.309	[M+K]+	512.343	5	Lys Pro Arg Ile	C23H44N8O5			NO	metabo_info.php?molid=172566
172568	551.309	[M+K]+	512.343	5	Lys Pro Arg Leu	C23H44N8O5			NO	metabo_info.php?molid=172568
173231	551.309	[M+K]+	512.343	5	Lys Arg Ile Pro	C23H44N8O5			NO	metabo_info.php?molid=173231
173271	551.309	[M+K]+	512.343	5	Lys Arg Leu Pro	C23H44N8O5			NO	metabo_info.php?molid=173271
173326	551.309	[M+K]+	512.343	5	Lys Arg Pro Ile	C23H44N8O5			NO	metabo_info.php?molid=173326
173328	551.309	[M+K]+	512.343	5	Lys Arg Pro Leu	C23H44N8O5			NO	metabo_info.php?molid=173328
178933	551.309	[M+K]+	512.343	5	Leu Lys Pro Arg	C23H44N8O5			NO	metabo_info.php?molid=178933
178971	551.309	[M+K]+	512.343	5	Leu Lys Arg Pro	C23H44N8O5			NO	metabo_info.php?molid=178971
180453	551.309	[M+K]+	512.343	5	Leu Pro Lys Arg	C23H44N8O5			NO	metabo_info.php?molid=180453
180567	551.309	[M+K]+	512.343	5	Leu Pro Arg Lys	C23H44N8O5			NO	metabo_info.php?molid=180567
181251	551.309	[M+K]+	512.343	5	Leu Arg Lys Pro	C23H44N8O5			NO	metabo_info.php?molid=181251
181327	551.309	[M+K]+	512.343	5	Leu Arg Pro Lys	C23H44N8O5			NO	metabo_info.php?molid=181327
202453	551.309	[M+K]+	512.343	5	Pro Ile Lys Arg	C23H44N8O5			NO	metabo_info.php?molid=202453
202567	551.309	[M+K]+	512.343	5	Pro Ile Arg Lys	C23H44N8O5			NO	metabo_info.php?molid=202567
202833	551.309	[M+K]+	512.343	5	Pro Lys Ile Arg	C23H44N8O5			NO	metabo_info.php?molid=202833
202873	551.309	[M+K]+	512.343	5	Pro Lys Leu Arg	C23H44N8O5			NO	metabo_info.php?molid=202873
202966	551.309	[M+K]+	512.343	5	Pro Lys Arg Ile	C23H44N8O5			NO	metabo_info.php?molid=202966
202968	551.309	[M+K]+	512.343	5	Pro Lys Arg Leu	C23H44N8O5			NO	metabo_info.php?molid=202968
203253	551.309	[M+K]+	512.343	5	Pro Leu Lys Arg	C23H44N8O5			NO	metabo_info.php?molid=203253
203367	551.309	[M+K]+	512.343	5	Pro Leu Arg Lys	C23H44N8O5			NO	metabo_info.php?molid=203367
205227	551.309	[M+K]+	512.343	5	Pro Arg Ile Lys	C23H44N8O5			NO	metabo_info.php?molid=205227
205246	551.309	[M+K]+	512.343	5	Pro Arg Lys Ile	C23H44N8O5			NO	metabo_info.php?molid=205246
205248	551.309	[M+K]+	512.343	5	Pro Arg Lys Leu	C23H44N8O5			NO	metabo_info.php?molid=205248
205267	551.309	[M+K]+	512.343	5	Pro Arg Leu Lys	C23H44N8O5			NO	metabo_info.php?molid=205267
218451	551.309	[M+K]+	512.343	5	Arg Ile Lys Pro	C23H44N8O5			NO	metabo_info.php?molid=218451
218527	551.309	[M+K]+	512.343	5	Arg Ile Pro Lys	C23H44N8O5			NO	metabo_info.php?molid=218527
218831	551.309	[M+K]+	512.343	5	Arg Lys Ile Pro	C23H44N8O5			NO	metabo_info.php?molid=218831
218871	551.309	[M+K]+	512.343	5	Arg Lys Leu Pro	C23H44N8O5			NO	metabo_info.php?molid=218871
218926	551.309	[M+K]+	512.343	5	Arg Lys Pro Ile	C23H44N8O5			NO	metabo_info.php?molid=218926
218928	551.309	[M+K]+	512.343	5	Arg Lys Pro Leu	C23H44N8O5			NO	metabo_info.php?molid=218928
219251	551.309	[M+K]+	512.343	5	Arg Leu Lys Pro	C23H44N8O5			NO	metabo_info.php?molid=219251
219327	551.309	[M+K]+	512.343	5	Arg Leu Pro Lys	C23H44N8O5			NO	metabo_info.php?molid=219327
220427	551.309	[M+K]+	512.343	5	Arg Pro Ile Lys	C23H44N8O5			NO	metabo_info.php?molid=220427
220446	551.309	[M+K]+	512.343	5	Arg Pro Lys Ile	C23H44N8O5			NO	metabo_info.php?molid=220446
220448	551.309	[M+K]+	512.343	5	Arg Pro Lys Leu	C23H44N8O5			NO	metabo_info.php?molid=220448
220467	551.309	[M+K]+	512.343	5	Arg Pro Leu Lys	C23H44N8O5			NO	metabo_info.php?molid=220467
42547	551.309	[M+K]+	512.35	6	ZK 159222	C32H48O5			NO	metabo_info.php?molid=42547
44498	551.309	[M+K]+	512.35	7	11-OXOURSOLIC ACID ACETATE	C32H48O5			YES	metabo_info.php?molid=44498
73545	551.309	[M+K]+	512.35	7	Acetyl-11-keto-B-Boswellic Acid, 3-	C32H48O5	67416-61-9		YES	metabo_info.php?molid=73545
53764	551.309	[M+K]+	512.35	7	(+)-Ganoderic acid S	C32H48O5			NO	metabo_info.php?molid=53764
71888	551.309	[M+K]+	512.35	7	Acetoxolone	C32H48O5	6277-14-1	C17734	NO	metabo_info.php?molid=71888
87996	551.309	[M+K]+	512.35	7	11a,12a-Epoxy-3b-hydroxy-28,13-oleananolide 3-acetate	C32H48O5	35738-25-1		NO	metabo_info.php?molid=87996
90108	551.309	[M+K]+	512.35	7	3beta-Acetoxy-12-oxo-28,13beta-oleananolide	C32H48O5	35959-11-6		NO	metabo_info.php?molid=90108
90616	551.309	[M+K]+	512.35	7	Ganoderic acid S	C32H48O5			NO	metabo_info.php?molid=90616
90630	551.309	[M+K]+	512.35	7	Ganoderic acid Mf	C32H48O5	108026-94-4		NO	metabo_info.php?molid=90630
90632	551.309	[M+K]+	512.35	7	Ganoderic acid X	C32H48O5	86377-53-9		NO	metabo_info.php?molid=90632
264936	679.383	[M+H]+	678.37	7	Leu Arg Asp Leu Tyr	C31H50N8O9			YES	metabo_info.php?molid=264936
81189	679.383	[M+Na]+	656.39	5	PI(22:0/0:0)	C31H61O12P			NO	metabo_info.php?molid=81189
71507	679.383	[M+K]+	640.419	1	Mosesin 4	C35H60O10	101691-14-9	C17024	NO	metabo_info.php?molid=71507
62889	1029.29	[M+K]+	990.328	2	Maltohexaose	C36H62O31	34620-77-4	C01936	YES	metabo_info.php?molid=62889
63208	1029.29	[M+K]+	990.328	2	Cellohexaose	C36H62O31		C06217	NO	metabo_info.php?molid=63208
66857	1029.29	[M+K]+	990.328	2	alpha-Galactosyl-(1-6)-alpha-galactosyl-(1-6)-alpha-galactosyl-(1-6)-alpha-galactosyl-(1-6)-alpha-glucosyl-(1-2)-beta-fructose	C36H62O31	512-72-1	C08238	NO	metabo_info.php?molid=66857
39120	782.57	[M+H]+	781.562	0	PC(16:0/20:4(5Z,8Z,11Z,14Z))	C44H80NO8P			NO	metabo_info.php?molid=39120
39370	782.57	[M+H]+	781.562	0	PC(16:0/20:4(5E,8E,11E,14E))	C44H80NO8P			NO	metabo_info.php?molid=39370
39371	782.57	[M+H]+	781.562	0	PC(16:0/20:4(5E,8E,11E,14E))[U]	C44H80NO8P			NO	metabo_info.php?molid=39371
39372	782.57	[M+H]+	781.562	0	PC(16:0/20:4(5Z,8Z,11Z,14Z))[U]	C44H80NO8P			NO	metabo_info.php?molid=39372
39513	782.57	[M+H]+	781.562	0	PC(18:0/18:4(5Z,8Z,11Z,14Z))[U]	C44H80NO8P			NO	metabo_info.php?molid=39513
39515	782.57	[M+H]+	781.562	0	PC(18:0/18:4(9E,11E,13E,15E))	C44H80NO8P			NO	metabo_info.php?molid=39515
39516	782.57	[M+H]+	781.562	0	PC(18:0/18:4(9E,11E,13E,15E))[U]	C44H80NO8P			NO	metabo_info.php?molid=39516
39517	782.57	[M+H]+	781.562	0	PC(18:0/18:4(9E,11E,13Z,15Z))[U]	C44H80NO8P			NO	metabo_info.php?molid=39517
39638	782.57	[M+H]+	781.562	0	PC(18:1(9Z)/18:3(6Z,9Z,12Z))[U]	C44H80NO8P			NO	metabo_info.php?molid=39638
39640	782.57	[M+H]+	781.562	0	PC(18:1(9Z)/18:3(9Z,12Z,15Z))[U]	C44H80NO8P			NO	metabo_info.php?molid=39640
39659	782.57	[M+H]+	781.562	0	PC(18:2(15E,17E)/18:2(15E,17E))[U]	C44H80NO8P			NO	metabo_info.php?molid=39659
39660	782.57	[M+H]+	781.562	0	PC(18:2(2E).4/18:2(2E,4E))[S]	C44H80NO8P			NO	metabo_info.php?molid=39660
39662	782.57	[M+H]+	781.562	0	PC(18:2(2E,4E)/18:2(2E,4E))	C44H80NO8P			NO	metabo_info.php?molid=39662
39663	782.57	[M+H]+	781.562	0	PC(18:2(2E,4E)/18:2(2E,4E))[S]	C44H80NO8P			NO	metabo_info.php?molid=39663
39664	782.57	[M+H]+	781.562	0	PC(18:2(2E,4E)/18:2(2E,4E))[U]	C44H80NO8P			NO	metabo_info.php?molid=39664
39665	782.57	[M+H]+	781.562	0	PC(18:2(2Z,4Z)/18:2(2Z,4Z))	C44H80NO8P			NO	metabo_info.php?molid=39665
39666	782.57	[M+H]+	781.562	0	PC(18:2(5Z,9Z)/18:2(5Z,9Z))[U]	C44H80NO8P			NO	metabo_info.php?molid=39666
39668	782.57	[M+H]+	781.562	0	PC(18:2(6Z,9Z)/18:2(6Z,9Z))	C44H80NO8P			NO	metabo_info.php?molid=39668
39669	782.57	[M+H]+	781.562	0	PC(18:2(6Z,9Z)/18:2(6Z,9Z))[U]	C44H80NO8P			NO	metabo_info.php?molid=39669
39670	782.57	[M+H]+	781.562	0	PC(18:2(9E,12Z)/18:2(9E,12Z))[U]	C44H80NO8P			NO	metabo_info.php?molid=39670
39671	782.57	[M+H]+	781.562	0	PC(18:2(9Z,11Z)/18:2(9Z,11Z))	C44H80NO8P			NO	metabo_info.php?molid=39671
39679	782.57	[M+H]+	781.562	0	PC(18:2(9Z,12Z)/18:2(9Z,12Z))[S]	C44H80NO8P			NO	metabo_info.php?molid=39679
39680	782.57	[M+H]+	781.562	0	PC(18:2(9Z,12Z)/18:2(9Z,12Z))[U]	C44H80NO8P			NO	metabo_info.php?molid=39680
39690	782.57	[M+H]+	781.562	0	PC(18:3(6Z,9Z,12Z)/18:1(9Z))[U]	C44H80NO8P			NO	metabo_info.php?molid=39690
39791	782.57	[M+H]+	781.562	0	PC(20:4(5Z,8Z,11Z,14Z)/16:0)[U]	C44H80NO8P			NO	metabo_info.php?molid=39791
39797	782.57	[M+H]+	781.562	0	PC(20:4(8E,11E,14E,17E)/16:0)	C44H80NO8P			NO	metabo_info.php?molid=39797
59339	782.57	[M+H]+	781.562	0	PC(14:0/22:4(7Z,10Z,13Z,16Z))	C44H80NO8P		C00157	NO	metabo_info.php?molid=59339
59431	782.57	[M+H]+	781.562	0	PC(16:0/20:4(8Z,11Z,14Z,17Z))	C44H80NO8P		C00157	NO	metabo_info.php?molid=59431
59461	782.57	[M+H]+	781.562	0	PC(16:1(9Z)/20:3(5Z,8Z,11Z))	C44H80NO8P		C00157	NO	metabo_info.php?molid=59461
59462	782.57	[M+H]+	781.562	0	PC(16:1(9Z)/20:3(8Z,11Z,14Z))	C44H80NO8P		C00157	NO	metabo_info.php?molid=59462
59490	782.57	[M+H]+	781.562	0	PC(18:0/18:4(6Z,9Z,12Z,15Z))	C44H80NO8P		C00157	NO	metabo_info.php?molid=59490
59520	782.57	[M+H]+	781.562	0	PC(18:1(11Z)/18:3(6Z,9Z,12Z))	C44H80NO8P		C00157	NO	metabo_info.php?molid=59520
59521	782.57	[M+H]+	781.562	0	PC(18:1(11Z)/18:3(9Z,12Z,15Z))	C44H80NO8P		C00157	NO	metabo_info.php?molid=59521
59552	782.57	[M+H]+	781.562	0	PC(18:1(9Z)/18:3(6Z,9Z,12Z))	C44H80NO8P		C00157	NO	metabo_info.php?molid=59552
59553	782.57	[M+H]+	781.562	0	PC(18:1(9Z)/18:3(9Z,12Z,15Z))	C44H80NO8P		C00157	NO	metabo_info.php?molid=59553
59584	782.57	[M+H]+	781.562	0	PC(18:2(9Z,12Z)/18:2(9Z,12Z))	C44H80NO8P		C00157	NO	metabo_info.php?molid=59584
59615	782.57	[M+H]+	781.562	0	PC(18:3(6Z,9Z,12Z)/18:1(11Z))	C44H80NO8P		C00157	NO	metabo_info.php?molid=59615
59616	782.57	[M+H]+	781.562	0	PC(18:3(6Z,9Z,12Z)/18:1(9Z))	C44H80NO8P		C00157	NO	metabo_info.php?molid=59616
59648	782.57	[M+H]+	781.562	0	PC(18:3(9Z,12Z,15Z)/18:1(11Z))	C44H80NO8P		C00157	NO	metabo_info.php?molid=59648
59649	782.57	[M+H]+	781.562	0	PC(18:3(9Z,12Z,15Z)/18:1(9Z))	C44H80NO8P		C00157	NO	metabo_info.php?molid=59649
59680	782.57	[M+H]+	781.562	0	PC(18:4(6Z,9Z,12Z,15Z)/18:0)	C44H80NO8P		C00157	NO	metabo_info.php?molid=59680
59811	782.57	[M+H]+	781.562	0	PC(20:3(5Z,8Z,11Z)/16:1(9Z))	C44H80NO8P		C00157	NO	metabo_info.php?molid=59811
59844	782.57	[M+H]+	781.562	0	PC(20:3(8Z,11Z,14Z)/16:1(9Z))	C44H80NO8P		C00157	NO	metabo_info.php?molid=59844
59875	782.57	[M+H]+	781.562	0	PC(20:4(5Z,8Z,11Z,14Z)/16:0)	C44H80NO8P		C00157	NO	metabo_info.php?molid=59875
59908	782.57	[M+H]+	781.562	0	PC(20:4(8Z,11Z,14Z,17Z)/16:0)	C44H80NO8P		C00157	NO	metabo_info.php?molid=59908
60069	782.57	[M+H]+	781.562	0	PC(22:4(7Z,10Z,13Z,16Z)/14:0)	C44H80NO8P		C00157	NO	metabo_info.php?molid=60069
76795	782.57	[M+H]+	781.562	0	PE(17:0/22:4(7Z,10Z,13Z,16Z))	C44H80NO8P			NO	metabo_info.php?molid=76795
76853	782.57	[M+H]+	781.562	0	PE(17:2(9Z,12Z)/22:2(13Z,16Z))	C44H80NO8P			NO	metabo_info.php?molid=76853
76998	782.57	[M+H]+	781.562	0	PE(18:4(6Z,9Z,12Z,15Z)/21:0)	C44H80NO8P			NO	metabo_info.php?molid=76998
77020	782.57	[M+H]+	781.562	0	PE(19:0/20:4(5Z,8Z,11Z,14Z))	C44H80NO8P			NO	metabo_info.php?molid=77020
77050	782.57	[M+H]+	781.562	0	PE(19:1(9Z)/20:3(8Z,11Z,14Z))	C44H80NO8P			NO	metabo_info.php?molid=77050
77155	782.57	[M+H]+	781.562	0	PE(20:3(8Z,11Z,14Z)/19:1(9Z))	C44H80NO8P			NO	metabo_info.php?molid=77155
77184	782.57	[M+H]+	781.562	0	PE(20:4(5Z,8Z,11Z,14Z)/19:0)	C44H80NO8P			NO	metabo_info.php?molid=77184
77238	782.57	[M+H]+	781.562	0	PE(21:0/18:4(6Z,9Z,12Z,15Z))	C44H80NO8P			NO	metabo_info.php?molid=77238
77316	782.57	[M+H]+	781.562	0	PE(22:2(13Z,16Z)/17:2(9Z,12Z))	C44H80NO8P			NO	metabo_info.php?molid=77316
77345	782.57	[M+H]+	781.562	0	PE(22:4(7Z,10Z,13Z,16Z)/17:0)	C44H80NO8P			NO	metabo_info.php?molid=77345
39317	782.57	[M+Na]+	759.578	3	PC(16:0/18:1(11E))	C42H82NO8P			NO	metabo_info.php?molid=39317
39319	782.57	[M+Na]+	759.578	3	PC(16:0/18:1(11Z))[U]	C42H82NO8P			NO	metabo_info.php?molid=39319
39320	782.57	[M+Na]+	759.578	3	PC(16:0/18:1(6E))	C42H82NO8P			NO	metabo_info.php?molid=39320
39321	782.57	[M+Na]+	759.578	3	PC(16:0/18:1(6Z))	C42H82NO8P			NO	metabo_info.php?molid=39321
39322	782.57	[M+Na]+	759.578	3	PC(16:0/18:1(6Z))[U]	C42H82NO8P			NO	metabo_info.php?molid=39322
39323	782.57	[M+Na]+	759.578	3	PC(16:0/18:1(9E))	C42H82NO8P			NO	metabo_info.php?molid=39323
39324	782.57	[M+Na]+	759.578	3	PC(16:0/18:1(9E))[U]	C42H82NO8P			NO	metabo_info.php?molid=39324
39325	782.57	[M+Na]+	759.578	3	PC(16:0/18:1(9Z))[S]	C42H82NO8P		C13875	NO	metabo_info.php?molid=39325
39326	782.57	[M+Na]+	759.578	3	PC(16:0/18:1(9Z))[U]	C42H82NO8P			NO	metabo_info.php?molid=39326
39420	782.57	[M+Na]+	759.578	3	PC(16:1(7Z)/18:0)[U]	C42H82NO8P			NO	metabo_info.php?molid=39420
39427	782.57	[M+Na]+	759.578	3	PC(16:1(9Z)/18:0)[U]	C42H82NO8P			NO	metabo_info.php?molid=39427
39615	782.57	[M+Na]+	759.578	3	PC(18:1(9E)/16:0)[U]	C42H82NO8P			NO	metabo_info.php?molid=39615
39626	782.57	[M+Na]+	759.578	3	PC(18:1(9Z)/16:0)[U]	C42H82NO8P			NO	metabo_info.php?molid=39626
59329	782.57	[M+Na]+	759.578	3	PC(14:0/20:1(11Z))	C42H82NO8P		C00157	NO	metabo_info.php?molid=59329
59361	782.57	[M+Na]+	759.578	3	PC(14:1(9Z)/20:0)	C42H82NO8P		C00157	NO	metabo_info.php?molid=59361
59420	782.57	[M+Na]+	759.578	3	PC(16:0/18:1(11Z))	C42H82NO8P		C00157	NO	metabo_info.php?molid=59420
59421	782.57	[M+Na]+	759.578	3	PC(16:0/18:1(9Z))	C42H82NO8P		C00157	NO	metabo_info.php?molid=59421
59451	782.57	[M+Na]+	759.578	3	PC(16:1(9Z)/18:0)	C42H82NO8P		C00157	NO	metabo_info.php?molid=59451
59483	782.57	[M+Na]+	759.578	3	PC(18:0/16:1(9Z))	C42H82NO8P		C00157	NO	metabo_info.php?molid=59483
59514	782.57	[M+Na]+	759.578	3	PC(18:1(11Z)/16:0)	C42H82NO8P		C00157	NO	metabo_info.php?molid=59514
59547	782.57	[M+Na]+	759.578	3	PC(18:1(9Z)/16:0)	C42H82NO8P		C00157	NO	metabo_info.php?molid=59547
59709	782.57	[M+Na]+	759.578	3	PC(20:0/14:1(9Z))	C42H82NO8P		C00157	NO	metabo_info.php?molid=59709
59741	782.57	[M+Na]+	759.578	3	PC(20:1(11Z)/14:0)	C42H82NO8P		C00157	NO	metabo_info.php?molid=59741
60351	782.57	[M+Na]+	759.578	3	PE(15:0/22:1(13Z))	C42H82NO8P		C00350	NO	metabo_info.php?molid=60351
60905	782.57	[M+Na]+	759.578	3	PE(22:1(13Z)/15:0)	C42H82NO8P		C00350	NO	metabo_info.php?molid=60905
75615	782.57	[M+Na]+	759.578	3	PC(12:0/22:1(11Z))	C42H82NO8P			NO	metabo_info.php?molid=75615
75699	782.57	[M+Na]+	759.578	3	PC(15:0/19:1(9Z))	C42H82NO8P			NO	metabo_info.php?molid=75699
75728	782.57	[M+Na]+	759.578	3	PC(15:1(9Z)/19:0)	C42H82NO8P			NO	metabo_info.php?molid=75728
75783	782.57	[M+Na]+	759.578	3	PC(17:0/17:1(9Z))	C42H82NO8P			NO	metabo_info.php?molid=75783
75809	782.57	[M+Na]+	759.578	3	PC(17:1(9Z)/17:0)	C42H82NO8P			NO	metabo_info.php?molid=75809
76012	782.57	[M+Na]+	759.578	3	PC(19:0/15:1(9Z))	C42H82NO8P			NO	metabo_info.php?molid=76012
76040	782.57	[M+Na]+	759.578	3	PC(19:1(9Z)/15:0)	C42H82NO8P			NO	metabo_info.php?molid=76040
76284	782.57	[M+Na]+	759.578	3	PC(22:1(11Z)/12:0)	C42H82NO8P			NO	metabo_info.php?molid=76284
76705	782.57	[M+Na]+	759.578	3	PE(15:0/22:1(11Z))	C42H82NO8P			NO	metabo_info.php?molid=76705
76735	782.57	[M+Na]+	759.578	3	PE(15:1(9Z)/22:0)	C42H82NO8P			NO	metabo_info.php?molid=76735
76769	782.57	[M+Na]+	759.578	3	PE(16:1(9Z)/21:0)	C42H82NO8P			NO	metabo_info.php?molid=76769
76787	782.57	[M+Na]+	759.578	3	PE(17:0/20:1(11Z))	C42H82NO8P			NO	metabo_info.php?molid=76787
76814	782.57	[M+Na]+	759.578	3	PE(17:1(9Z)/20:0)	C42H82NO8P			NO	metabo_info.php?molid=76814
76866	782.57	[M+Na]+	759.578	3	PE(18:0/19:1(9Z))	C42H82NO8P			NO	metabo_info.php?molid=76866
76880	782.57	[M+Na]+	759.578	3	PE(18:1(9Z)/19:0)	C42H82NO8P			NO	metabo_info.php?molid=76880
77010	782.57	[M+Na]+	759.578	3	PE(19:0/18:1(9Z))	C42H82NO8P			NO	metabo_info.php?molid=77010
77039	782.57	[M+Na]+	759.578	3	PE(19:1(9Z)/18:0)	C42H82NO8P			NO	metabo_info.php?molid=77039
77064	782.57	[M+Na]+	759.578	3	PE(20:0/17:1(9Z))	C42H82NO8P			NO	metabo_info.php?molid=77064
77084	782.57	[M+Na]+	759.578	3	PE(20:1(11Z)/17:0)	C42H82NO8P			NO	metabo_info.php?molid=77084
77230	782.57	[M+Na]+	759.578	3	PE(21:0/16:1(9Z))	C42H82NO8P			NO	metabo_info.php?molid=77230
77253	782.57	[M+Na]+	759.578	3	PE(22:0/15:1(9Z))	C42H82NO8P			NO	metabo_info.php?molid=77253
77279	782.57	[M+Na]+	759.578	3	PE(22:1(11Z)/15:0)	C42H82NO8P			NO	metabo_info.php?molid=77279
51451	363.069	[M+H]+	362.064	6	5,7,3\',4\',5\'-Pentahydroxy-3,6-dimethoxyflavone	C17H14O9			NO	metabo_info.php?molid=51451
51452	363.069	[M+H]+	362.064	6	3,5,7,3\',5\'-Pentahydroxy-6,4\'-dimethoxyflavone	C17H14O9			NO	metabo_info.php?molid=51452
51691	363.069	[M+H]+	362.064	6	5,8,3\',4\',5\'-Pentahydroxy-3,7-dimethoxyflavone	C17H14O9			NO	metabo_info.php?molid=51691
51740	363.069	[M+H]+	362.064	6	5,7,8,3\',4\'-Pentahydroxy-3,6-dimethoxyflavone	C17H14O9			NO	metabo_info.php?molid=51740
51741	363.069	[M+H]+	362.064	6	3,5,7,3\',4\'-Pentahydroxy-6,8-dimethoxyflavone	C17H14O9			NO	metabo_info.php?molid=51741
43929	363.069	[M+Na]+	340.079	0	AESCULIN	C15H16O9	531-75-9	C09264	YES	metabo_info.php?molid=43929
64185	363.069	[M+Na]+	340.079	0	Sinapoyl malate	C15H16O9		C02887	NO	metabo_info.php?molid=64185
65594	363.069	[M+Na]+	340.079	0	Daphnin	C15H16O9	486-55-5	C01421	NO	metabo_info.php?molid=65594
67515	363.069	[M+Na]+	340.079	0	Cichoriin	C15H16O9	531-58-8	C09206	NO	metabo_info.php?molid=67515
66635	363.069	[M+K]+	324.103	7	Prazepam	C19H17ClN2O	2955-38-6	C07366	NO	metabo_info.php?molid=66635
95426	363.069	[M+K]+	324.105	0	Polixetonium chloride	C10H28Cl2N2OP2	31512-74-0		NO	metabo_info.php?molid=95426
66164	363.069	[M+K]+	324.106	0	Bis-D-fructose 2\',1:2,1\'-dianhydride	C12H20O10	3568-49-8	C04333	NO	metabo_info.php?molid=66164
66178	363.069	[M+K]+	324.106	0	D-Fructofuranose 1,2\':2,3\'-dianhydride	C12H20O10		C04420	NO	metabo_info.php?molid=66178
86599	363.069	[M+K]+	324.106	0	D-1-Deoxy-erythro-hexo-2,3-diulose	C12H20O10			NO	metabo_info.php?molid=86599
72985	363.069	[M+K]+	324.107	3	Levofuraltadone	C13H16N4O6	3795-88-8	C19267	NO	metabo_info.php?molid=72985
36849	917.703	[M+K]+	878.736	3	TG(17:2(9Z,12Z)/17:2(9Z,12Z)/20:2(11Z,14Z))[iso3]	C57H98O6			NO	metabo_info.php?molid=36849
36853	917.703	[M+K]+	878.736	3	TG(17:1(9Z)/17:2(9Z,12Z)/20:3(8Z,11Z,14Z))[iso6]	C57H98O6			NO	metabo_info.php?molid=36853
36856	917.703	[M+K]+	878.736	3	TG(17:0/17:2(9Z,12Z)/20:4(5Z,8Z,11Z,14Z))[iso6]	C57H98O6			NO	metabo_info.php?molid=36856
36857	917.703	[M+K]+	878.736	3	TG(17:1(9Z)/17:1(9Z)/20:4(5Z,8Z,11Z,14Z))[iso3]	C57H98O6			NO	metabo_info.php?molid=36857
36860	917.703	[M+K]+	878.736	3	TG(17:0/17:1(9Z)/20:5(5Z,8Z,11Z,14Z,17Z))[iso6]	C57H98O6			NO	metabo_info.php?molid=36860
36870	917.703	[M+K]+	878.736	3	TG(18:2(9Z,12Z)/18:2(9Z,12Z)/18:2(9Z,12Z))	C57H98O6			NO	metabo_info.php?molid=36870
36871	917.703	[M+K]+	878.736	3	TG(18:0/18:3(9Z,12Z,15Z)/18:3(9Z,12Z,15Z))[iso3]	C57H98O6			NO	metabo_info.php?molid=36871
36872	917.703	[M+K]+	878.736	3	TG(18:1(9Z)/18:2(9Z,12Z)/18:3(9Z,12Z,15Z))[iso6]	C57H98O6			NO	metabo_info.php?molid=36872
36889	917.703	[M+K]+	878.736	3	TG(16:1(9Z)/18:3(9Z,12Z,15Z)/20:2(11Z,14Z))[iso6]	C57H98O6			NO	metabo_info.php?molid=36889
36893	917.703	[M+K]+	878.736	3	TG(16:0/18:3(9Z,12Z,15Z)/20:3(8Z,11Z,14Z))[iso6]	C57H98O6			NO	metabo_info.php?molid=36893
36894	917.703	[M+K]+	878.736	3	TG(16:1(9Z)/18:2(9Z,12Z)/20:3(8Z,11Z,14Z))[iso6]	C57H98O6			NO	metabo_info.php?molid=36894
36898	917.703	[M+K]+	878.736	3	TG(16:0/18:2(9Z,12Z)/20:4(5Z,8Z,11Z,14Z))[iso6]	C57H98O6			NO	metabo_info.php?molid=36898
36899	917.703	[M+K]+	878.736	3	TG(16:1(9Z)/18:1(9Z)/20:4(5Z,8Z,11Z,14Z))[iso6]	C57H98O6			NO	metabo_info.php?molid=36899
36902	917.703	[M+K]+	878.736	3	TG(16:0/18:1(9Z)/20:5(5Z,8Z,11Z,14Z,17Z))[iso6]	C57H98O6			NO	metabo_info.php?molid=36902
36903	917.703	[M+K]+	878.736	3	TG(16:1(9Z)/18:0/20:5(5Z,8Z,11Z,14Z,17Z))[iso6]	C57H98O6			NO	metabo_info.php?molid=36903
37023	917.703	[M+K]+	878.736	3	TG(16:1(9Z)/16:1(9Z)/22:4(7Z,10Z,13Z,16Z))[iso3]	C57H98O6			NO	metabo_info.php?molid=37023
37024	917.703	[M+K]+	878.736	3	TG(16:0/16:1(9Z)/22:5(7Z,10Z,13Z,16Z,19Z))[iso6]	C57H98O6			NO	metabo_info.php?molid=37024
37025	917.703	[M+K]+	878.736	3	TG(16:0/16:0/22:6(4Z,7Z,10Z,13Z,16Z,19Z))[iso3]	C57H98O6			NO	metabo_info.php?molid=37025
61759	917.703	[M+K]+	878.736	3	TG(18:1(9Z)/16:0/20:5(5Z,8Z,11Z,14Z,17Z))[iso6]	C57H98O6			NO	metabo_info.php?molid=61759
61779	917.703	[M+K]+	878.736	3	TG(18:2(9Z,12Z)/18:1(9Z)/18:3(6Z,9Z,12Z))[iso6]	C57H98O6			NO	metabo_info.php?molid=61779
61780	917.703	[M+K]+	878.736	3	TG(18:2(9Z,12Z)/18:1(9Z)/18:3(9Z,12Z,15Z))[iso6]	C57H98O6			NO	metabo_info.php?molid=61780
61792	917.703	[M+K]+	878.736	3	TG(18:3(9Z,12Z,15Z)/18:0/18:3(9Z,12Z,15Z))[iso3]	C57H98O6			NO	metabo_info.php?molid=61792
98661	917.703	[M+K]+	878.736	3	TG(14:0/20:3(8Z,11Z,14Z)/20:3(8Z,11Z,14Z))[iso3]	C57H98O6			NO	metabo_info.php?molid=98661
98882	917.703	[M+K]+	878.736	3	TG(18:0/18:3(6Z,9Z,12Z)/18:3(6Z,9Z,12Z))[iso3]	C57H98O6			NO	metabo_info.php?molid=98882
98886	917.703	[M+K]+	878.736	3	TG(18:1(9Z)/18:1(9Z)/18:4(6Z,9Z,12Z,15Z))[iso3]	C57H98O6			NO	metabo_info.php?molid=98886
99448	917.703	[M+K]+	878.736	3	TG(12:0/20:0/22:6(4Z,7Z,10Z,13Z,16Z,19Z))[iso6]	C57H98O6			NO	metabo_info.php?molid=99448
99459	917.703	[M+K]+	878.736	3	TG(12:0/20:1(11Z)/22:5(7Z,10Z,13Z,16Z,19Z))[iso6]	C57H98O6			NO	metabo_info.php?molid=99459
99469	917.703	[M+K]+	878.736	3	TG(12:0/20:2(11Z,14Z)/22:4(7Z,10Z,13Z,16Z))[iso6]	C57H98O6			NO	metabo_info.php?molid=99469
99478	917.703	[M+K]+	878.736	3	TG(12:0/20:3(8Z,11Z,14Z)/22:3(10Z,13Z,16Z))[iso6]	C57H98O6			NO	metabo_info.php?molid=99478
99486	917.703	[M+K]+	878.736	3	TG(12:0/20:4(5Z,8Z,11Z,14Z)/22:2(13Z,16Z))[iso6]	C57H98O6			NO	metabo_info.php?molid=99486
99493	917.703	[M+K]+	878.736	3	TG(12:0/20:5(5Z,8Z,11Z,14Z,17Z)/22:1(11Z))[iso6]	C57H98O6			NO	metabo_info.php?molid=99493
99886	917.703	[M+K]+	878.736	3	TG(13:0/19:0/22:6(4Z,7Z,10Z,13Z,16Z,19Z))[iso6]	C57H98O6			NO	metabo_info.php?molid=99886
99899	917.703	[M+K]+	878.736	3	TG(13:0/19:1(9Z)/22:5(7Z,10Z,13Z,16Z,19Z))[iso6]	C57H98O6			NO	metabo_info.php?molid=99899
100216	917.703	[M+K]+	878.736	3	TG(14:0/18:0/22:6(4Z,7Z,10Z,13Z,16Z,19Z))[iso6]	C57H98O6			NO	metabo_info.php?molid=100216
100235	917.703	[M+K]+	878.736	3	TG(14:0/18:1(9Z)/22:5(7Z,10Z,13Z,16Z,19Z))[iso6]	C57H98O6			NO	metabo_info.php?molid=100235
100253	917.703	[M+K]+	878.736	3	TG(14:0/18:2(9Z,12Z)/22:4(7Z,10Z,13Z,16Z))[iso6]	C57H98O6			NO	metabo_info.php?molid=100253
100270	917.703	[M+K]+	878.736	3	TG(14:0/18:3(6Z,9Z,12Z)/22:3(10Z,13Z,16Z))[iso6]	C57H98O6			NO	metabo_info.php?molid=100270
100287	917.703	[M+K]+	878.736	3	TG(14:0/18:3(9Z,12Z,15Z)/22:3(10Z,13Z,16Z))[iso6]	C57H98O6			NO	metabo_info.php?molid=100287
100302	917.703	[M+K]+	878.736	3	TG(14:0/18:4(6Z,9Z,12Z,15Z)/22:2(13Z,16Z))[iso6]	C57H98O6			NO	metabo_info.php?molid=100302
100352	917.703	[M+K]+	878.736	3	TG(14:0/20:1(11Z)/20:5(5Z,8Z,11Z,14Z,17Z))[iso6]	C57H98O6			NO	metabo_info.php?molid=100352
100362	917.703	[M+K]+	878.736	3	TG(14:0/20:2(11Z,14Z)/20:4(5Z,8Z,11Z,14Z))[iso6]	C57H98O6			NO	metabo_info.php?molid=100362
100621	917.703	[M+K]+	878.736	3	TG(14:1(9Z)/18:0/22:5(7Z,10Z,13Z,16Z,19Z))[iso6]	C57H98O6			NO	metabo_info.php?molid=100621
100640	917.703	[M+K]+	878.736	3	TG(14:1(9Z)/18:1(9Z)/22:4(7Z,10Z,13Z,16Z))[iso6]	C57H98O6			NO	metabo_info.php?molid=100640
100658	917.703	[M+K]+	878.736	3	TG(14:1(9Z)/18:2(9Z,12Z)/22:3(10Z,13Z,16Z))[iso6]	C57H98O6			NO	metabo_info.php?molid=100658
100675	917.703	[M+K]+	878.736	3	TG(14:1(9Z)/18:3(6Z,9Z,12Z)/22:2(13Z,16Z))[iso6]	C57H98O6			NO	metabo_info.php?molid=100675
100692	917.703	[M+K]+	878.736	3	TG(14:1(9Z)/18:3(9Z,12Z,15Z)/22:2(13Z,16Z))[iso6]	C57H98O6			NO	metabo_info.php?molid=100692
100707	917.703	[M+K]+	878.736	3	TG(14:1(9Z)/18:4(6Z,9Z,12Z,15Z)/22:1(11Z))[iso6]	C57H98O6			NO	metabo_info.php?molid=100707
100746	917.703	[M+K]+	878.736	3	TG(14:1(9Z)/20:0/20:5(5Z,8Z,11Z,14Z,17Z))[iso6]	C57H98O6			NO	metabo_info.php?molid=100746
100757	917.703	[M+K]+	878.736	3	TG(14:1(9Z)/20:1(11Z)/20:4(5Z,8Z,11Z,14Z))[iso6]	C57H98O6			NO	metabo_info.php?molid=100757
100767	917.703	[M+K]+	878.736	3	TG(14:1(9Z)/20:2(11Z,14Z)/20:3(8Z,11Z,14Z))[iso6]	C57H98O6			NO	metabo_info.php?molid=100767
100931	917.703	[M+K]+	878.736	3	TG(15:0/17:0/22:6(4Z,7Z,10Z,13Z,16Z,19Z))[iso6]	C57H98O6			NO	metabo_info.php?molid=100931
100953	917.703	[M+K]+	878.736	3	TG(15:0/17:1(9Z)/22:5(7Z,10Z,13Z,16Z,19Z))[iso6]	C57H98O6			NO	metabo_info.php?molid=100953
100974	917.703	[M+K]+	878.736	3	TG(15:0/17:2(9Z,12Z)/22:4(7Z,10Z,13Z,16Z))[iso6]	C57H98O6			NO	metabo_info.php?molid=100974
101104	917.703	[M+K]+	878.736	3	TG(15:0/19:1(9Z)/20:5(5Z,8Z,11Z,14Z,17Z))[iso6]	C57H98O6			NO	metabo_info.php?molid=101104
101277	917.703	[M+K]+	878.736	3	TG(15:1(9Z)/17:0/22:5(7Z,10Z,13Z,16Z,19Z))[iso6]	C57H98O6			NO	metabo_info.php?molid=101277
101299	917.703	[M+K]+	878.736	3	TG(15:1(9Z)/17:1(9Z)/22:4(7Z,10Z,13Z,16Z))[iso6]	C57H98O6			NO	metabo_info.php?molid=101299
101320	917.703	[M+K]+	878.736	3	TG(15:1(9Z)/17:2(9Z,12Z)/22:3(10Z,13Z,16Z))[iso6]	C57H98O6			NO	metabo_info.php?molid=101320
101441	917.703	[M+K]+	878.736	3	TG(15:1(9Z)/19:0/20:5(5Z,8Z,11Z,14Z,17Z))[iso6]	C57H98O6			NO	metabo_info.php?molid=101441
101454	917.703	[M+K]+	878.736	3	TG(15:1(9Z)/19:1(9Z)/20:4(5Z,8Z,11Z,14Z))[iso6]	C57H98O6			NO	metabo_info.php?molid=101454
101590	917.703	[M+K]+	878.736	3	TG(16:0/18:3(6Z,9Z,12Z)/20:3(8Z,11Z,14Z))[iso6]	C57H98O6			NO	metabo_info.php?molid=101590
101608	917.703	[M+K]+	878.736	3	TG(16:0/18:4(6Z,9Z,12Z,15Z)/20:2(11Z,14Z))[iso6]	C57H98O6			NO	metabo_info.php?molid=101608
101680	917.703	[M+K]+	878.736	3	TG(16:1(9Z)/18:3(6Z,9Z,12Z)/20:2(11Z,14Z))[iso6]	C57H98O6			NO	metabo_info.php?molid=101680
101698	917.703	[M+K]+	878.736	3	TG(16:1(9Z)/18:4(6Z,9Z,12Z,15Z)/20:1(11Z))[iso6]	C57H98O6			NO	metabo_info.php?molid=101698
101866	917.703	[M+K]+	878.736	3	TG(17:1(9Z)/18:4(6Z,9Z,12Z,15Z)/19:1(9Z))[iso6]	C57H98O6			NO	metabo_info.php?molid=101866
101926	917.703	[M+K]+	878.736	3	TG(17:2(9Z,12Z)/18:3(6Z,9Z,12Z)/19:1(9Z))[iso6]	C57H98O6			NO	metabo_info.php?molid=101926
101942	917.703	[M+K]+	878.736	3	TG(17:2(9Z,12Z)/18:3(9Z,12Z,15Z)/19:1(9Z))[iso6]	C57H98O6			NO	metabo_info.php?molid=101942
101944	917.703	[M+K]+	878.736	3	TG(17:2(9Z,12Z)/18:4(6Z,9Z,12Z,15Z)/19:0)[iso6]	C57H98O6			NO	metabo_info.php?molid=101944
101995	917.703	[M+K]+	878.736	3	TG(18:0/18:2(9Z,12Z)/18:4(6Z,9Z,12Z,15Z))[iso6]	C57H98O6			NO	metabo_info.php?molid=101995
101998	917.703	[M+K]+	878.736	3	TG(18:0/18:3(6Z,9Z,12Z)/18:3(9Z,12Z,15Z))[iso6]	C57H98O6			NO	metabo_info.php?molid=101998
102065	917.703	[M+K]+	878.736	3	TG(18:1(9Z)/18:2(9Z,12Z)/18:3(6Z,9Z,12Z))[iso6]	C57H98O6			NO	metabo_info.php?molid=102065
3688	696.336	[M+Na]+	673.346	0	Veratridine	C36H51NO11	71-62-5	C06544	YES	metabo_info.php?molid=3688
67099	696.336	[M+Na]+	673.346	0	Bikhaconitine	C36H51NO11	6078-26-8	C08664	NO	metabo_info.php?molid=67099
49452	671.201	[M+Na]+	648.205	9	Embigenin 2\'\'-(2\'\'\'-acetylrhamnoside)	C31H36O15			NO	metabo_info.php?molid=49452
64649	671.201	[M+Na]+	648.217	7	Caylin-2	C32H30F6N4O4	NA		YES	metabo_info.php?molid=64649
95820	671.201	[M+K]+	632.241	4	Mulberrofuran E	C39H36O8	89803-87-2		NO	metabo_info.php?molid=95820
57766	663.409	[M+H]+	662.403	2	cimicifoetiside A	C37H58O10			NO	metabo_info.php?molid=57766
44962	663.409	[M+H]+	662.408	9	Prostaglandin E2-biotin	C35H58N4O6S	NA		YES	metabo_info.php?molid=44962
71507	663.409	[M+Na]+	640.419	1	Mosesin 4	C35H60O10	101691-14-9	C17024	NO	metabo_info.php?molid=71507
104099	509.148	[M+Na]+	486.161	3	Ala Cys Met Tyr	C20H30N4O6S2			NO	metabo_info.php?molid=104099
104270	509.148	[M+Na]+	486.161	3	Ala Cys Tyr Met	C20H30N4O6S2			NO	metabo_info.php?molid=104270
107519	509.148	[M+Na]+	486.161	3	Ala Met Cys Tyr	C20H30N4O6S2			NO	metabo_info.php?molid=107519
107861	509.148	[M+Na]+	486.161	3	Ala Met Tyr Cys	C20H30N4O6S2			NO	metabo_info.php?molid=107861
111110	509.148	[M+Na]+	486.161	3	Ala Tyr Cys Met	C20H30N4O6S2			NO	metabo_info.php?molid=111110
111281	509.148	[M+Na]+	486.161	3	Ala Tyr Met Cys	C20H30N4O6S2			NO	metabo_info.php?molid=111281
111699	509.148	[M+Na]+	486.161	3	Cys Ala Met Tyr	C20H30N4O6S2			NO	metabo_info.php?molid=111699
111870	509.148	[M+Na]+	486.161	3	Cys Ala Tyr Met	C20H30N4O6S2			NO	metabo_info.php?molid=111870
112239	509.148	[M+Na]+	486.161	3	Cys Cys Val Tyr	C20H30N4O6S2			NO	metabo_info.php?molid=112239
112277	509.148	[M+Na]+	486.161	3	Cys Cys Tyr Val	C20H30N4O6S2			NO	metabo_info.php?molid=112277
113295	509.148	[M+Na]+	486.161	3	Cys Phe Met Ser	C20H30N4O6S2			NO	metabo_info.php?molid=113295
113390	509.148	[M+Na]+	486.161	3	Cys Phe Ser Met	C20H30N4O6S2			NO	metabo_info.php?molid=113390
115499	509.148	[M+Na]+	486.161	3	Cys Met Ala Tyr	C20H30N4O6S2			NO	metabo_info.php?molid=115499
115575	509.148	[M+Na]+	486.161	3	Cys Met Phe Ser	C20H30N4O6S2			NO	metabo_info.php?molid=115575
115784	509.148	[M+Na]+	486.161	3	Cys Met Ser Phe	C20H30N4O6S2			NO	metabo_info.php?molid=115784
115860	509.148	[M+Na]+	486.161	3	Cys Met Tyr Ala	C20H30N4O6S2			NO	metabo_info.php?molid=115860
117570	509.148	[M+Na]+	486.161	3	Cys Ser Phe Met	C20H30N4O6S2			NO	metabo_info.php?molid=117570
117684	509.148	[M+Na]+	486.161	3	Cys Ser Met Phe	C20H30N4O6S2			NO	metabo_info.php?molid=117684
118319	509.148	[M+Na]+	486.161	3	Cys Val Cys Tyr	C20H30N4O6S2			NO	metabo_info.php?molid=118319
118661	509.148	[M+Na]+	486.161	3	Cys Val Tyr Cys	C20H30N4O6S2			NO	metabo_info.php?molid=118661
119090	509.148	[M+Na]+	486.161	3	Cys Tyr Ala Met	C20H30N4O6S2			NO	metabo_info.php?molid=119090
119117	509.148	[M+Na]+	486.161	3	Cys Tyr Cys Val	C20H30N4O6S2			NO	metabo_info.php?molid=119117
119280	509.148	[M+Na]+	486.161	3	Cys Tyr Met Ala	C20H30N4O6S2			NO	metabo_info.php?molid=119280
119421	509.148	[M+Na]+	486.161	3	Cys Tyr Val Cys	C20H30N4O6S2			NO	metabo_info.php?molid=119421
136095	509.148	[M+Na]+	486.161	3	Phe Cys Met Ser	C20H30N4O6S2			NO	metabo_info.php?molid=136095
136190	509.148	[M+Na]+	486.161	3	Phe Cys Ser Met	C20H30N4O6S2			NO	metabo_info.php?molid=136190
139514	509.148	[M+Na]+	486.161	3	Phe Met Cys Ser	C20H30N4O6S2			NO	metabo_info.php?molid=139514
139780	509.148	[M+Na]+	486.161	3	Phe Met Ser Cys	C20H30N4O6S2			NO	metabo_info.php?molid=139780
141509	509.148	[M+Na]+	486.161	3	Phe Ser Cys Met	C20H30N4O6S2			NO	metabo_info.php?molid=141509
141680	509.148	[M+Na]+	486.161	3	Phe Ser Met Cys	C20H30N4O6S2			NO	metabo_info.php?molid=141680
183518	509.148	[M+Na]+	486.161	3	Met Ala Cys Tyr	C20H30N4O6S2			NO	metabo_info.php?molid=183518
183860	509.148	[M+Na]+	486.161	3	Met Ala Tyr Cys	C20H30N4O6S2			NO	metabo_info.php?molid=183860
183898	509.148	[M+Na]+	486.161	3	Met Cys Ala Tyr	C20H30N4O6S2			NO	metabo_info.php?molid=183898
183974	509.148	[M+Na]+	486.161	3	Met Cys Phe Ser	C20H30N4O6S2			NO	metabo_info.php?molid=183974
184183	509.148	[M+Na]+	486.161	3	Met Cys Ser Phe	C20H30N4O6S2			NO	metabo_info.php?molid=184183
184259	509.148	[M+Na]+	486.161	3	Met Cys Tyr Ala	C20H30N4O6S2			NO	metabo_info.php?molid=184259
185114	509.148	[M+Na]+	486.161	3	Met Phe Cys Ser	C20H30N4O6S2			NO	metabo_info.php?molid=185114
185380	509.148	[M+Na]+	486.161	3	Met Phe Ser Cys	C20H30N4O6S2			NO	metabo_info.php?molid=185380
189503	509.148	[M+Na]+	486.161	3	Met Ser Cys Phe	C20H30N4O6S2			NO	metabo_info.php?molid=189503
189560	509.148	[M+Na]+	486.161	3	Met Ser Phe Cys	C20H30N4O6S2			NO	metabo_info.php?molid=189560
191080	509.148	[M+Na]+	486.161	3	Met Tyr Ala Cys	C20H30N4O6S2			NO	metabo_info.php?molid=191080
191099	509.148	[M+Na]+	486.161	3	Met Tyr Cys Ala	C20H30N4O6S2			NO	metabo_info.php?molid=191099
223969	509.148	[M+Na]+	486.161	3	Ser Cys Phe Met	C20H30N4O6S2			NO	metabo_info.php?molid=223969
224083	509.148	[M+Na]+	486.161	3	Ser Cys Met Phe	C20H30N4O6S2			NO	metabo_info.php?molid=224083
225109	509.148	[M+Na]+	486.161	3	Ser Phe Cys Met	C20H30N4O6S2			NO	metabo_info.php?molid=225109
225280	509.148	[M+Na]+	486.161	3	Ser Phe Met Cys	C20H30N4O6S2			NO	metabo_info.php?molid=225280
227503	509.148	[M+Na]+	486.161	3	Ser Met Cys Phe	C20H30N4O6S2			NO	metabo_info.php?molid=227503
227560	509.148	[M+Na]+	486.161	3	Ser Met Phe Cys	C20H30N4O6S2			NO	metabo_info.php?molid=227560
239918	509.148	[M+Na]+	486.161	3	Val Cys Cys Tyr	C20H30N4O6S2			NO	metabo_info.php?molid=239918
240260	509.148	[M+Na]+	486.161	3	Val Cys Tyr Cys	C20H30N4O6S2			NO	metabo_info.php?molid=240260
247100	509.148	[M+Na]+	486.161	3	Val Tyr Cys Cys	C20H30N4O6S2			NO	metabo_info.php?molid=247100
255509	509.148	[M+Na]+	486.161	3	Tyr Ala Cys Met	C20H30N4O6S2			NO	metabo_info.php?molid=255509
255680	509.148	[M+Na]+	486.161	3	Tyr Ala Met Cys	C20H30N4O6S2			NO	metabo_info.php?molid=255680
255889	509.148	[M+Na]+	486.161	3	Tyr Cys Ala Met	C20H30N4O6S2			NO	metabo_info.php?molid=255889
255916	509.148	[M+Na]+	486.161	3	Tyr Cys Cys Val	C20H30N4O6S2			NO	metabo_info.php?molid=255916
256079	509.148	[M+Na]+	486.161	3	Tyr Cys Met Ala	C20H30N4O6S2			NO	metabo_info.php?molid=256079
256220	509.148	[M+Na]+	486.161	3	Tyr Cys Val Cys	C20H30N4O6S2			NO	metabo_info.php?molid=256220
259480	509.148	[M+Na]+	486.161	3	Tyr Met Ala Cys	C20H30N4O6S2			NO	metabo_info.php?molid=259480
259499	509.148	[M+Na]+	486.161	3	Tyr Met Cys Ala	C20H30N4O6S2			NO	metabo_info.php?molid=259499
262300	509.148	[M+Na]+	486.161	3	Tyr Val Cys Cys	C20H30N4O6S2			NO	metabo_info.php?molid=262300
107799	509.148	[M+K]+	470.184	2	Ala Met Ser Tyr	C20H30N4O7S			NO	metabo_info.php?molid=107799
107875	509.148	[M+K]+	470.184	2	Ala Met Tyr Ser	C20H30N4O7S			NO	metabo_info.php?molid=107875
109699	509.148	[M+K]+	470.184	2	Ala Ser Met Tyr	C20H30N4O7S			NO	metabo_info.php?molid=109699
109870	509.148	[M+K]+	470.184	2	Ala Ser Tyr Met	C20H30N4O7S			NO	metabo_info.php?molid=109870
111295	509.148	[M+K]+	470.184	2	Ala Tyr Met Ser	C20H30N4O7S			NO	metabo_info.php?molid=111295
111390	509.148	[M+K]+	470.184	2	Ala Tyr Ser Met	C20H30N4O7S			NO	metabo_info.php?molid=111390
113416	509.148	[M+K]+	470.184	2	Cys Phe Thr Thr	C20H30N4O7S			NO	metabo_info.php?molid=113416
117839	509.148	[M+K]+	470.184	2	Cys Ser Val Tyr	C20H30N4O7S			NO	metabo_info.php?molid=117839
117877	509.148	[M+K]+	470.184	2	Cys Ser Tyr Val	C20H30N4O7S			NO	metabo_info.php?molid=117877
117976	509.148	[M+K]+	470.184	2	Cys Thr Phe Thr	C20H30N4O7S			NO	metabo_info.php?molid=117976
118204	509.148	[M+K]+	470.184	2	Cys Thr Thr Phe	C20H30N4O7S			NO	metabo_info.php?molid=118204
118599	509.148	[M+K]+	470.184	2	Cys Val Ser Tyr	C20H30N4O7S			NO	metabo_info.php?molid=118599
118675	509.148	[M+K]+	470.184	2	Cys Val Tyr Ser	C20H30N4O7S			NO	metabo_info.php?molid=118675
119397	509.148	[M+K]+	470.184	2	Cys Tyr Ser Val	C20H30N4O7S			NO	metabo_info.php?molid=119397
119435	509.148	[M+K]+	470.184	2	Cys Tyr Val Ser	C20H30N4O7S			NO	metabo_info.php?molid=119435
136216	509.148	[M+K]+	470.184	2	Phe Cys Thr Thr	C20H30N4O7S			NO	metabo_info.php?molid=136216
139794	509.148	[M+K]+	470.184	2	Phe Met Ser Ser	C20H30N4O7S			NO	metabo_info.php?molid=139794
141694	509.148	[M+K]+	470.184	2	Phe Ser Met Ser	C20H30N4O7S			NO	metabo_info.php?molid=141694
141789	509.148	[M+K]+	470.184	2	Phe Ser Ser Met	C20H30N4O7S			NO	metabo_info.php?molid=141789
141915	509.148	[M+K]+	470.184	2	Phe Thr Cys Thr	C20H30N4O7S			NO	metabo_info.php?molid=141915
142200	509.148	[M+K]+	470.184	2	Phe Thr Thr Cys	C20H30N4O7S			NO	metabo_info.php?molid=142200
147818	509.148	[M+K]+	470.184	2	Gly Met Thr Tyr	C20H30N4O7S			NO	metabo_info.php?molid=147818
147875	509.148	[M+K]+	470.184	2	Gly Met Tyr Thr	C20H30N4O7S			NO	metabo_info.php?molid=147875
150098	509.148	[M+K]+	470.184	2	Gly Thr Met Tyr	C20H30N4O7S			NO	metabo_info.php?molid=150098
150269	509.148	[M+K]+	470.184	2	Gly Thr Tyr Met	C20H30N4O7S			NO	metabo_info.php?molid=150269
151295	509.148	[M+K]+	470.184	2	Gly Tyr Met Thr	C20H30N4O7S			NO	metabo_info.php?molid=151295
151409	509.148	[M+K]+	470.184	2	Gly Tyr Thr Met	C20H30N4O7S			NO	metabo_info.php?molid=151409
183798	509.148	[M+K]+	470.184	2	Met Ala Ser Tyr	C20H30N4O7S			NO	metabo_info.php?molid=183798
183874	509.148	[M+K]+	470.184	2	Met Ala Tyr Ser	C20H30N4O7S			NO	metabo_info.php?molid=183874
185394	509.148	[M+K]+	470.184	2	Met Phe Ser Ser	C20H30N4O7S			NO	metabo_info.php?molid=185394
185818	509.148	[M+K]+	470.184	2	Met Gly Thr Tyr	C20H30N4O7S			NO	metabo_info.php?molid=185818
185875	509.148	[M+K]+	470.184	2	Met Gly Tyr Thr	C20H30N4O7S			NO	metabo_info.php?molid=185875
189498	509.148	[M+K]+	470.184	2	Met Ser Ala Tyr	C20H30N4O7S			NO	metabo_info.php?molid=189498
189574	509.148	[M+K]+	470.184	2	Met Ser Phe Ser	C20H30N4O7S			NO	metabo_info.php?molid=189574
189783	509.148	[M+K]+	470.184	2	Met Ser Ser Phe	C20H30N4O7S			NO	metabo_info.php?molid=189783
189859	509.148	[M+K]+	470.184	2	Met Ser Tyr Ala	C20H30N4O7S			NO	metabo_info.php?molid=189859
189998	509.148	[M+K]+	470.184	2	Met Thr Gly Tyr	C20H30N4O7S			NO	metabo_info.php?molid=189998
190264	509.148	[M+K]+	470.184	2	Met Thr Tyr Gly	C20H30N4O7S			NO	metabo_info.php?molid=190264
191094	509.148	[M+K]+	470.184	2	Met Tyr Ala Ser	C20H30N4O7S			NO	metabo_info.php?molid=191094
191195	509.148	[M+K]+	470.184	2	Met Tyr Gly Thr	C20H30N4O7S			NO	metabo_info.php?molid=191195
191379	509.148	[M+K]+	470.184	2	Met Tyr Ser Ala	C20H30N4O7S			NO	metabo_info.php?molid=191379
191404	509.148	[M+K]+	470.184	2	Met Tyr Thr Gly	C20H30N4O7S			NO	metabo_info.php?molid=191404
223698	509.148	[M+K]+	470.184	2	Ser Ala Met Tyr	C20H30N4O7S			NO	metabo_info.php?molid=223698
223869	509.148	[M+K]+	470.184	2	Ser Ala Tyr Met	C20H30N4O7S			NO	metabo_info.php?molid=223869
224238	509.148	[M+K]+	470.184	2	Ser Cys Val Tyr	C20H30N4O7S			NO	metabo_info.php?molid=224238
224276	509.148	[M+K]+	470.184	2	Ser Cys Tyr Val	C20H30N4O7S			NO	metabo_info.php?molid=224276
225294	509.148	[M+K]+	470.184	2	Ser Phe Met Ser	C20H30N4O7S			NO	metabo_info.php?molid=225294
225389	509.148	[M+K]+	470.184	2	Ser Phe Ser Met	C20H30N4O7S			NO	metabo_info.php?molid=225389
227498	509.148	[M+K]+	470.184	2	Ser Met Ala Tyr	C20H30N4O7S			NO	metabo_info.php?molid=227498
227574	509.148	[M+K]+	470.184	2	Ser Met Phe Ser	C20H30N4O7S			NO	metabo_info.php?molid=227574
227783	509.148	[M+K]+	470.184	2	Ser Met Ser Phe	C20H30N4O7S			NO	metabo_info.php?molid=227783
227859	509.148	[M+K]+	470.184	2	Ser Met Tyr Ala	C20H30N4O7S			NO	metabo_info.php?molid=227859
229569	509.148	[M+K]+	470.184	2	Ser Ser Phe Met	C20H30N4O7S			NO	metabo_info.php?molid=229569
229683	509.148	[M+K]+	470.184	2	Ser Ser Met Phe	C20H30N4O7S			NO	metabo_info.php?molid=229683
230318	509.148	[M+K]+	470.184	2	Ser Val Cys Tyr	C20H30N4O7S			NO	metabo_info.php?molid=230318
230660	509.148	[M+K]+	470.184	2	Ser Val Tyr Cys	C20H30N4O7S			NO	metabo_info.php?molid=230660
231089	509.148	[M+K]+	470.184	2	Ser Tyr Ala Met	C20H30N4O7S			NO	metabo_info.php?molid=231089
231116	509.148	[M+K]+	470.184	2	Ser Tyr Cys Val	C20H30N4O7S			NO	metabo_info.php?molid=231116
231279	509.148	[M+K]+	470.184	2	Ser Tyr Met Ala	C20H30N4O7S			NO	metabo_info.php?molid=231279
231420	509.148	[M+K]+	470.184	2	Ser Tyr Val Cys	C20H30N4O7S			NO	metabo_info.php?molid=231420
231975	509.148	[M+K]+	470.184	2	Thr Cys Phe Thr	C20H30N4O7S			NO	metabo_info.php?molid=231975
232203	509.148	[M+K]+	470.184	2	Thr Cys Thr Phe	C20H30N4O7S			NO	metabo_info.php?molid=232203
233115	509.148	[M+K]+	470.184	2	Thr Phe Cys Thr	C20H30N4O7S			NO	metabo_info.php?molid=233115
233400	509.148	[M+K]+	470.184	2	Thr Phe Thr Cys	C20H30N4O7S			NO	metabo_info.php?molid=233400
233698	509.148	[M+K]+	470.184	2	Thr Gly Met Tyr	C20H30N4O7S			NO	metabo_info.php?molid=233698
233869	509.148	[M+K]+	470.184	2	Thr Gly Tyr Met	C20H30N4O7S			NO	metabo_info.php?molid=233869
235598	509.148	[M+K]+	470.184	2	Thr Met Gly Tyr	C20H30N4O7S			NO	metabo_info.php?molid=235598
235864	509.148	[M+K]+	470.184	2	Thr Met Tyr Gly	C20H30N4O7S			NO	metabo_info.php?molid=235864
237903	509.148	[M+K]+	470.184	2	Thr Thr Cys Phe	C20H30N4O7S			NO	metabo_info.php?molid=237903
237960	509.148	[M+K]+	470.184	2	Thr Thr Phe Cys	C20H30N4O7S			NO	metabo_info.php?molid=237960
239189	509.148	[M+K]+	470.184	2	Thr Tyr Gly Met	C20H30N4O7S			NO	metabo_info.php?molid=239189
239284	509.148	[M+K]+	470.184	2	Thr Tyr Met Gly	C20H30N4O7S			NO	metabo_info.php?molid=239284
240198	509.148	[M+K]+	470.184	2	Val Cys Ser Tyr	C20H30N4O7S			NO	metabo_info.php?molid=240198
240274	509.148	[M+K]+	470.184	2	Val Cys Tyr Ser	C20H30N4O7S			NO	metabo_info.php?molid=240274
245518	509.148	[M+K]+	470.184	2	Val Ser Cys Tyr	C20H30N4O7S			NO	metabo_info.php?molid=245518
245860	509.148	[M+K]+	470.184	2	Val Ser Tyr Cys	C20H30N4O7S			NO	metabo_info.php?molid=245860
247114	509.148	[M+K]+	470.184	2	Val Tyr Cys Ser	C20H30N4O7S			NO	metabo_info.php?molid=247114
247380	509.148	[M+K]+	470.184	2	Val Tyr Ser Cys	C20H30N4O7S			NO	metabo_info.php?molid=247380
255694	509.148	[M+K]+	470.184	2	Tyr Ala Met Ser	C20H30N4O7S			NO	metabo_info.php?molid=255694
255789	509.148	[M+K]+	470.184	2	Tyr Ala Ser Met	C20H30N4O7S			NO	metabo_info.php?molid=255789
256196	509.148	[M+K]+	470.184	2	Tyr Cys Ser Val	C20H30N4O7S			NO	metabo_info.php?molid=256196
256234	509.148	[M+K]+	470.184	2	Tyr Cys Val Ser	C20H30N4O7S			NO	metabo_info.php?molid=256234
257695	509.148	[M+K]+	470.184	2	Tyr Gly Met Thr	C20H30N4O7S			NO	metabo_info.php?molid=257695
257809	509.148	[M+K]+	470.184	2	Tyr Gly Thr Met	C20H30N4O7S			NO	metabo_info.php?molid=257809
259494	509.148	[M+K]+	470.184	2	Tyr Met Ala Ser	C20H30N4O7S			NO	metabo_info.php?molid=259494
259595	509.148	[M+K]+	470.184	2	Tyr Met Gly Thr	C20H30N4O7S			NO	metabo_info.php?molid=259595
259779	509.148	[M+K]+	470.184	2	Tyr Met Ser Ala	C20H30N4O7S			NO	metabo_info.php?molid=259779
259804	509.148	[M+K]+	470.184	2	Tyr Met Thr Gly	C20H30N4O7S			NO	metabo_info.php?molid=259804
261489	509.148	[M+K]+	470.184	2	Tyr Ser Ala Met	C20H30N4O7S			NO	metabo_info.php?molid=261489
261516	509.148	[M+K]+	470.184	2	Tyr Ser Cys Val	C20H30N4O7S			NO	metabo_info.php?molid=261516
261679	509.148	[M+K]+	470.184	2	Tyr Ser Met Ala	C20H30N4O7S			NO	metabo_info.php?molid=261679
261820	509.148	[M+K]+	470.184	2	Tyr Ser Val Cys	C20H30N4O7S			NO	metabo_info.php?molid=261820
261989	509.148	[M+K]+	470.184	2	Tyr Thr Gly Met	C20H30N4O7S			NO	metabo_info.php?molid=261989
262084	509.148	[M+K]+	470.184	2	Tyr Thr Met Gly	C20H30N4O7S			NO	metabo_info.php?molid=262084
262314	509.148	[M+K]+	470.184	2	Tyr Val Cys Ser	C20H30N4O7S			NO	metabo_info.php?molid=262314
262580	509.148	[M+K]+	470.184	2	Tyr Val Ser Cys	C20H30N4O7S			NO	metabo_info.php?molid=262580
156114	509.148	[M+K]+	470.187	5	His Asn Asn Ser	C17H26N8O8			NO	metabo_info.php?molid=156114
156190	509.148	[M+K]+	470.187	5	His Asn Ser Asn	C17H26N8O8			NO	metabo_info.php?molid=156190
157710	509.148	[M+K]+	470.187	5	His Ser Asn Asn	C17H26N8O8			NO	metabo_info.php?molid=157710
194114	509.148	[M+K]+	470.187	5	Asn His Asn Ser	C17H26N8O8			NO	metabo_info.php?molid=194114
194190	509.148	[M+K]+	470.187	5	Asn His Ser Asn	C17H26N8O8			NO	metabo_info.php?molid=194190
196014	509.148	[M+K]+	470.187	5	Asn Asn His Ser	C17H26N8O8			NO	metabo_info.php?molid=196014
196185	509.148	[M+K]+	470.187	5	Asn Asn Ser His	C17H26N8O8			NO	metabo_info.php?molid=196185
197610	509.148	[M+K]+	470.187	5	Asn Ser His Asn	C17H26N8O8			NO	metabo_info.php?molid=197610
197705	509.148	[M+K]+	470.187	5	Asn Ser Asn His	C17H26N8O8			NO	metabo_info.php?molid=197705
226110	509.148	[M+K]+	470.187	5	Ser His Asn Asn	C17H26N8O8			NO	metabo_info.php?molid=226110
228010	509.148	[M+K]+	470.187	5	Ser Asn His Asn	C17H26N8O8			NO	metabo_info.php?molid=228010
228105	509.148	[M+K]+	470.187	5	Ser Asn Asn His	C17H26N8O8			NO	metabo_info.php?molid=228105
34485	347.095	[M+H]+	346.085	7	raclopride	C15H20Cl2N2O3			YES	metabo_info.php?molid=34485
93933	347.095	[M+H]+	346.09	6	Methyl 6-O-galloyl-beta-D-glucopyranoside	C14H18O10	88647-06-7		NO	metabo_info.php?molid=93933
66635	347.095	[M+Na]+	324.103	7	Prazepam	C19H17ClN2O	2955-38-6	C07366	NO	metabo_info.php?molid=66635
95426	347.095	[M+Na]+	324.105	0	Polixetonium chloride	C10H28Cl2N2OP2	31512-74-0		NO	metabo_info.php?molid=95426
66164	347.095	[M+Na]+	324.106	0	Bis-D-fructose 2\',1:2,1\'-dianhydride	C12H20O10	3568-49-8	C04333	NO	metabo_info.php?molid=66164
66178	347.095	[M+Na]+	324.106	0	D-Fructofuranose 1,2\':2,3\'-dianhydride	C12H20O10		C04420	NO	metabo_info.php?molid=66178
86599	347.095	[M+Na]+	324.106	0	D-1-Deoxy-erythro-hexo-2,3-diulose	C12H20O10			NO	metabo_info.php?molid=86599
72985	347.095	[M+Na]+	324.107	3	Levofuraltadone	C13H16N4O6	3795-88-8	C19267	NO	metabo_info.php?molid=72985
60554	736.463	[M+K]+	697.505	7	PE(18:3(6Z,9Z,12Z)/P-16:0)	C39H72NO7P		C00350	NO	metabo_info.php?molid=60554
60586	736.463	[M+K]+	697.505	7	PE(18:3(9Z,12Z,15Z)/P-16:0)	C39H72NO7P		C00350	NO	metabo_info.php?molid=60586
62155	736.463	[M+K]+	697.505	7	PE(P-16:0/18:3(6Z,9Z,12Z))	C39H72NO7P			NO	metabo_info.php?molid=62155
62156	736.463	[M+K]+	697.505	7	PE(P-16:0/18:3(9Z,12Z,15Z))	C39H72NO7P			NO	metabo_info.php?molid=62156
77509	736.463	[M+K]+	697.505	7	PE(O-16:0/18:4(6Z,9Z,12Z,15Z))	C39H72NO7P			NO	metabo_info.php?molid=77509
77706	736.463	[M+K]+	697.505	7	1-tetrahexanoyl-2-(8-[3]-ladderane-octanyl)-sn-glycerophosphoethanolamine	C39H72NO7P			NO	metabo_info.php?molid=77706
221398	581.32	[M+H]+	580.308	8	Arg Arg Ser Tyr	C24H40N10O7			NO	metabo_info.php?molid=221398
221474	581.32	[M+H]+	580.308	8	Arg Arg Tyr Ser	C24H40N10O7			NO	metabo_info.php?molid=221474
221778	581.32	[M+H]+	580.308	8	Arg Ser Arg Tyr	C24H40N10O7			NO	metabo_info.php?molid=221778
221873	581.32	[M+H]+	580.308	8	Arg Ser Tyr Arg	C24H40N10O7			NO	metabo_info.php?molid=221873
223374	581.32	[M+H]+	580.308	8	Arg Tyr Arg Ser	C24H40N10O7			NO	metabo_info.php?molid=223374
223393	581.32	[M+H]+	580.308	8	Arg Tyr Ser Arg	C24H40N10O7			NO	metabo_info.php?molid=223393
229378	581.32	[M+H]+	580.308	8	Ser Arg Arg Tyr	C24H40N10O7			NO	metabo_info.php?molid=229378
229473	581.32	[M+H]+	580.308	8	Ser Arg Tyr Arg	C24H40N10O7			NO	metabo_info.php?molid=229473
231373	581.32	[M+H]+	580.308	8	Ser Tyr Arg Arg	C24H40N10O7			NO	metabo_info.php?molid=231373
261374	581.32	[M+H]+	580.308	8	Tyr Arg Arg Ser	C24H40N10O7			NO	metabo_info.php?molid=261374
261393	581.32	[M+H]+	580.308	8	Tyr Arg Ser Arg	C24H40N10O7			NO	metabo_info.php?molid=261393
261773	581.32	[M+H]+	580.308	8	Tyr Ser Arg Arg	C24H40N10O7			NO	metabo_info.php?molid=261773
66901	581.32	[M+H]+	580.312	1	Hordatine B	C29H40N8O5	10502-21-3	C08308	NO	metabo_info.php?molid=66901
138893	581.32	[M+H]+	580.316	4	Phe Lys Met Arg	C26H44N8O5S			NO	metabo_info.php?molid=138893
138969	581.32	[M+H]+	580.316	4	Phe Lys Arg Met	C26H44N8O5S			NO	metabo_info.php?molid=138969
139653	581.32	[M+H]+	580.316	4	Phe Met Lys Arg	C26H44N8O5S			NO	metabo_info.php?molid=139653
139767	581.32	[M+H]+	580.316	4	Phe Met Arg Lys	C26H44N8O5S			NO	metabo_info.php?molid=139767
141249	581.32	[M+H]+	580.316	4	Phe Arg Lys Met	C26H44N8O5S			NO	metabo_info.php?molid=141249
141287	581.32	[M+H]+	580.316	4	Phe Arg Met Lys	C26H44N8O5S			NO	metabo_info.php?molid=141287
169293	581.32	[M+H]+	580.316	4	Lys Phe Met Arg	C26H44N8O5S			NO	metabo_info.php?molid=169293
169369	581.32	[M+H]+	580.316	4	Lys Phe Arg Met	C26H44N8O5S			NO	metabo_info.php?molid=169369
171573	581.32	[M+H]+	580.316	4	Lys Met Phe Arg	C26H44N8O5S			NO	metabo_info.php?molid=171573
171763	581.32	[M+H]+	580.316	4	Lys Met Arg Phe	C26H44N8O5S			NO	metabo_info.php?molid=171763
173169	581.32	[M+H]+	580.316	4	Lys Arg Phe Met	C26H44N8O5S			NO	metabo_info.php?molid=173169
173283	581.32	[M+H]+	580.316	4	Lys Arg Met Phe	C26H44N8O5S			NO	metabo_info.php?molid=173283
185253	581.32	[M+H]+	580.316	4	Met Phe Lys Arg	C26H44N8O5S			NO	metabo_info.php?molid=185253
185367	581.32	[M+H]+	580.316	4	Met Phe Arg Lys	C26H44N8O5S			NO	metabo_info.php?molid=185367
186773	581.32	[M+H]+	580.316	4	Met Lys Phe Arg	C26H44N8O5S			NO	metabo_info.php?molid=186773
186963	581.32	[M+H]+	580.316	4	Met Lys Arg Phe	C26H44N8O5S			NO	metabo_info.php?molid=186963
189167	581.32	[M+H]+	580.316	4	Met Arg Phe Lys	C26H44N8O5S			NO	metabo_info.php?molid=189167
189243	581.32	[M+H]+	580.316	4	Met Arg Lys Phe	C26H44N8O5S			NO	metabo_info.php?molid=189243
217249	581.32	[M+H]+	580.316	4	Arg Phe Lys Met	C26H44N8O5S			NO	metabo_info.php?molid=217249
217287	581.32	[M+H]+	580.316	4	Arg Phe Met Lys	C26H44N8O5S			NO	metabo_info.php?molid=217287
218769	581.32	[M+H]+	580.316	4	Arg Lys Phe Met	C26H44N8O5S			NO	metabo_info.php?molid=218769
218883	581.32	[M+H]+	580.316	4	Arg Lys Met Phe	C26H44N8O5S			NO	metabo_info.php?molid=218883
219567	581.32	[M+H]+	580.316	4	Arg Met Phe Lys	C26H44N8O5S			NO	metabo_info.php?molid=219567
219643	581.32	[M+H]+	580.316	4	Arg Met Lys Phe	C26H44N8O5S			NO	metabo_info.php?molid=219643
138047	581.32	[M+Na]+	558.328	5	Phe His Lys Lys	C27H42N8O5			NO	metabo_info.php?molid=138047
138807	581.32	[M+Na]+	558.328	5	Phe Lys His Lys	C27H42N8O5			YES	metabo_info.php?molid=138807
138845	581.32	[M+Na]+	558.328	5	Phe Lys Lys His	C27H42N8O5			NO	metabo_info.php?molid=138845
153247	581.32	[M+Na]+	558.328	5	His Phe Lys Lys	C27H42N8O5			NO	metabo_info.php?molid=153247
154767	581.32	[M+Na]+	558.328	5	His Lys Phe Lys	C27H42N8O5			YES	metabo_info.php?molid=154767
154843	581.32	[M+Na]+	558.328	5	His Lys Lys Phe	C27H42N8O5			NO	metabo_info.php?molid=154843
169207	581.32	[M+Na]+	558.328	5	Lys Phe His Lys	C27H42N8O5			NO	metabo_info.php?molid=169207
169245	581.32	[M+Na]+	558.328	5	Lys Phe Lys His	C27H42N8O5			NO	metabo_info.php?molid=169245
169967	581.32	[M+Na]+	558.328	5	Lys His Phe Lys	C27H42N8O5			NO	metabo_info.php?molid=169967
170043	581.32	[M+Na]+	558.328	5	Lys His Lys Phe	C27H42N8O5			NO	metabo_info.php?molid=170043
170765	581.32	[M+Na]+	558.328	5	Lys Lys Phe His	C27H42N8O5			NO	metabo_info.php?molid=170765
170803	581.32	[M+Na]+	558.328	5	Lys Lys His Phe	C27H42N8O5			NO	metabo_info.php?molid=170803
222637	581.32	[M+Na]+	558.328	5	Arg Val Val Trp	C27H42N8O5			NO	metabo_info.php?molid=222637
222656	581.32	[M+Na]+	558.328	5	Arg Val Trp Val	C27H42N8O5			NO	metabo_info.php?molid=222656
223036	581.32	[M+Na]+	558.328	5	Arg Trp Val Val	C27H42N8O5			NO	metabo_info.php?molid=223036
245437	581.32	[M+Na]+	558.328	5	Val Arg Val Trp	C27H42N8O5			NO	metabo_info.php?molid=245437
245456	581.32	[M+Na]+	558.328	5	Val Arg Trp Val	C27H42N8O5			NO	metabo_info.php?molid=245456
246577	581.32	[M+Na]+	558.328	5	Val Val Arg Trp	C27H42N8O5			NO	metabo_info.php?molid=246577
246653	581.32	[M+Na]+	558.328	5	Val Val Trp Arg	C27H42N8O5			NO	metabo_info.php?molid=246653
246976	581.32	[M+Na]+	558.328	5	Val Trp Arg Val	C27H42N8O5			NO	metabo_info.php?molid=246976
247033	581.32	[M+Na]+	558.328	5	Val Trp Val Arg	C27H42N8O5			NO	metabo_info.php?molid=247033
253436	581.32	[M+Na]+	558.328	5	Trp Arg Val Val	C27H42N8O5			NO	metabo_info.php?molid=253436
254576	581.32	[M+Na]+	558.328	5	Trp Val Arg Val	C27H42N8O5			NO	metabo_info.php?molid=254576
254633	581.32	[M+Na]+	558.328	5	Trp Val Val Arg	C27H42N8O5			NO	metabo_info.php?molid=254633
4731	869.703	[M+K]+	830.736	3	TG(16:0/17:1(9Z)/17:1(9Z))[iso3]	C53H98O6			NO	metabo_info.php?molid=4731
4732	869.703	[M+K]+	830.736	3	TG(16:1(9Z)/17:0/17:1(9Z))[iso6]	C53H98O6			NO	metabo_info.php?molid=4732
4733	869.703	[M+K]+	830.736	3	TG(16:0/17:0/17:2(9Z,12Z))[iso6]	C53H98O6			NO	metabo_info.php?molid=4733
4741	869.703	[M+K]+	830.736	3	TG(16:1(9Z)/16:1(9Z)/18:0)[iso3]	C53H98O6			NO	metabo_info.php?molid=4741
4742	869.703	[M+K]+	830.736	3	TG(16:0/16:1(9Z)/18:1(9Z))[iso6]	C53H98O6			NO	metabo_info.php?molid=4742
4743	869.703	[M+K]+	830.736	3	TG(16:0/16:0/18:2(9Z,12Z))[iso3]	C53H98O6			NO	metabo_info.php?molid=4743
61729	869.703	[M+K]+	830.736	3	TG(16:1(9Z)/16:0/18:1(11Z))[iso6]	C53H98O6			NO	metabo_info.php?molid=61729
61736	869.703	[M+K]+	830.736	3	TG(18:0/14:0/18:2(9Z,12Z))[iso6]	C53H98O6			NO	metabo_info.php?molid=61736
61740	869.703	[M+K]+	830.736	3	TG(18:1(11Z)/14:0/18:1(11Z))[iso3]	C53H98O6			NO	metabo_info.php?molid=61740
61741	869.703	[M+K]+	830.736	3	TG(18:1(11Z)/14:0/18:1(9Z))[iso6]	C53H98O6			NO	metabo_info.php?molid=61741
61754	869.703	[M+K]+	830.736	3	TG(18:1(9Z)/14:0/18:1(9Z))[iso3]	C53H98O6			NO	metabo_info.php?molid=61754
87423	869.703	[M+K]+	830.736	3	Glycerol 1,2-di-(9Z-octadecenoate) 3-tetradecanoate	C53H98O6	35804-98-9		NO	metabo_info.php?molid=87423
87424	869.703	[M+K]+	830.736	3	Glycerol 1,2-dihexadecanoate 3-(9Z,12Z-octadecadienoate)	C53H98O6	2535-35-5		NO	metabo_info.php?molid=87424
87425	869.703	[M+K]+	830.736	3	Glycerol 1,3-dihexadecanoate 2-(9Z,12Z-octadecadienoate)	C53H98O6	2442-56-0		NO	metabo_info.php?molid=87425
98535	869.703	[M+K]+	830.736	3	TG(12:0/19:1(9Z)/19:1(9Z))[iso3]	C53H98O6			NO	metabo_info.php?molid=98535
98637	869.703	[M+K]+	830.736	3	TG(14:0/14:0/22:2(13Z,16Z))[iso3]	C53H98O6			NO	metabo_info.php?molid=98637
98651	869.703	[M+K]+	830.736	3	TG(14:0/18:1(9Z)/18:1(9Z))[iso3]	C53H98O6			NO	metabo_info.php?molid=98651
98694	869.703	[M+K]+	830.736	3	TG(14:1(9Z)/14:1(9Z)/22:0)[iso3]	C53H98O6			NO	metabo_info.php?molid=98694
98746	869.703	[M+K]+	830.736	3	TG(15:0/15:0/20:2(11Z,14Z))[iso3]	C53H98O6			NO	metabo_info.php?molid=98746
98797	869.703	[M+K]+	830.736	3	TG(15:1(9Z)/15:1(9Z)/20:0)[iso3]	C53H98O6			NO	metabo_info.php?molid=98797
99197	869.703	[M+K]+	830.736	3	TG(12:0/16:0/22:2(13Z,16Z))[iso6]	C53H98O6			NO	metabo_info.php?molid=99197
99221	869.703	[M+K]+	830.736	3	TG(12:0/16:1(9Z)/22:1(11Z))[iso6]	C53H98O6			NO	metabo_info.php?molid=99221
99288	869.703	[M+K]+	830.736	3	TG(12:0/17:2(9Z,12Z)/21:0)[iso6]	C53H98O6			NO	metabo_info.php?molid=99288
99305	869.703	[M+K]+	830.736	3	TG(12:0/18:0/20:2(11Z,14Z))[iso6]	C53H98O6			NO	metabo_info.php?molid=99305
99324	869.703	[M+K]+	830.736	3	TG(12:0/18:1(9Z)/20:1(11Z))[iso6]	C53H98O6			NO	metabo_info.php?molid=99324
99342	869.703	[M+K]+	830.736	3	TG(12:0/18:2(9Z,12Z)/20:0)[iso6]	C53H98O6			NO	metabo_info.php?molid=99342
99609	869.703	[M+K]+	830.736	3	TG(13:0/15:0/22:2(13Z,16Z))[iso6]	C53H98O6			NO	metabo_info.php?molid=99609
99635	869.703	[M+K]+	830.736	3	TG(13:0/15:1(9Z)/22:1(11Z))[iso6]	C53H98O6			NO	metabo_info.php?molid=99635
99704	869.703	[M+K]+	830.736	3	TG(13:0/17:0/20:2(11Z,14Z))[iso6]	C53H98O6			NO	metabo_info.php?molid=99704
99726	869.703	[M+K]+	830.736	3	TG(13:0/17:1(9Z)/20:1(11Z))[iso6]	C53H98O6			NO	metabo_info.php?molid=99726
99747	869.703	[M+K]+	830.736	3	TG(13:0/17:2(9Z,12Z)/20:0)[iso6]	C53H98O6			NO	metabo_info.php?molid=99747
99787	869.703	[M+K]+	830.736	3	TG(13:0/18:1(9Z)/19:1(9Z))[iso6]	C53H98O6			NO	metabo_info.php?molid=99787
99805	869.703	[M+K]+	830.736	3	TG(13:0/18:2(9Z,12Z)/19:0)[iso6]	C53H98O6			NO	metabo_info.php?molid=99805
100015	869.703	[M+K]+	830.736	3	TG(14:0/14:1(9Z)/22:1(11Z))[iso6]	C53H98O6			NO	metabo_info.php?molid=100015
100090	869.703	[M+K]+	830.736	3	TG(14:0/16:0/20:2(11Z,14Z))[iso6]	C53H98O6			NO	metabo_info.php?molid=100090
100114	869.703	[M+K]+	830.736	3	TG(14:0/16:1(9Z)/20:1(11Z))[iso6]	C53H98O6			NO	metabo_info.php?molid=100114
100159	869.703	[M+K]+	830.736	3	TG(14:0/17:1(9Z)/19:1(9Z))[iso6]	C53H98O6			NO	metabo_info.php?molid=100159
100180	869.703	[M+K]+	830.736	3	TG(14:0/17:2(9Z,12Z)/19:0)[iso6]	C53H98O6			NO	metabo_info.php?molid=100180
100197	869.703	[M+K]+	830.736	3	TG(14:0/18:0/18:2(9Z,12Z))[iso6]	C53H98O6			NO	metabo_info.php?molid=100197
100474	869.703	[M+K]+	830.736	3	TG(14:1(9Z)/15:1(9Z)/21:0)[iso6]	C53H98O6			NO	metabo_info.php?molid=100474
100495	869.703	[M+K]+	830.736	3	TG(14:1(9Z)/16:0/20:1(11Z))[iso6]	C53H98O6			NO	metabo_info.php?molid=100495
100519	869.703	[M+K]+	830.736	3	TG(14:1(9Z)/16:1(9Z)/20:0)[iso6]	C53H98O6			NO	metabo_info.php?molid=100519
100542	869.703	[M+K]+	830.736	3	TG(14:1(9Z)/17:0/19:1(9Z))[iso6]	C53H98O6			NO	metabo_info.php?molid=100542
100564	869.703	[M+K]+	830.736	3	TG(14:1(9Z)/17:1(9Z)/19:0)[iso6]	C53H98O6			NO	metabo_info.php?molid=100564
100602	869.703	[M+K]+	830.736	3	TG(14:1(9Z)/18:0/18:1(9Z))[iso6]	C53H98O6			NO	metabo_info.php?molid=100602
100847	869.703	[M+K]+	830.736	3	TG(15:0/15:1(9Z)/20:1(11Z))[iso6]	C53H98O6			NO	metabo_info.php?molid=100847
100893	869.703	[M+K]+	830.736	3	TG(15:0/16:1(9Z)/19:1(9Z))[iso6]	C53H98O6			NO	metabo_info.php?molid=100893
100912	869.703	[M+K]+	830.736	3	TG(15:0/17:0/18:2(9Z,12Z))[iso6]	C53H98O6			NO	metabo_info.php?molid=100912
100934	869.703	[M+K]+	830.736	3	TG(15:0/17:1(9Z)/18:1(9Z))[iso6]	C53H98O6			NO	metabo_info.php?molid=100934
100955	869.703	[M+K]+	830.736	3	TG(15:0/17:2(9Z,12Z)/18:0)[iso6]	C53H98O6			NO	metabo_info.php?molid=100955
101215	869.703	[M+K]+	830.736	3	TG(15:1(9Z)/16:0/19:1(9Z))[iso6]	C53H98O6			NO	metabo_info.php?molid=101215
101239	869.703	[M+K]+	830.736	3	TG(15:1(9Z)/16:1(9Z)/19:0)[iso6]	C53H98O6			NO	metabo_info.php?molid=101239
101258	869.703	[M+K]+	830.736	3	TG(15:1(9Z)/17:0/18:1(9Z))[iso6]	C53H98O6			NO	metabo_info.php?molid=101258
101280	869.703	[M+K]+	830.736	3	TG(15:1(9Z)/17:1(9Z)/18:0)[iso6]	C53H98O6			NO	metabo_info.php?molid=101280
36805	895.718	[M+K]+	856.752	2	TG(17:1(9Z)/17:2(9Z,12Z)/18:0)[iso6]	C55H100O6			NO	metabo_info.php?molid=36805
36807	895.718	[M+K]+	856.752	2	TG(16:0/18:1(9Z)/18:2(9Z,12Z))[iso6]	C55H100O6			NO	metabo_info.php?molid=36807
4800	895.718	[M+K]+	856.752	2	TG(17:0/17:2(9Z,12Z)/18:1(9Z))[iso6]	C55H100O6			NO	metabo_info.php?molid=4800
4801	895.718	[M+K]+	856.752	2	TG(17:1(9Z)/17:1(9Z)/18:1(9Z))[iso3]	C55H100O6			NO	metabo_info.php?molid=4801
4804	895.718	[M+K]+	856.752	2	TG(17:0/17:1(9Z)/18:2(9Z,12Z))[iso6]	C55H100O6			NO	metabo_info.php?molid=4804
4807	895.718	[M+K]+	856.752	2	TG(17:0/17:0/18:3(9Z,12Z,15Z))[iso3]	C55H100O6			NO	metabo_info.php?molid=4807
4816	895.718	[M+K]+	856.752	2	TG(16:1(9Z)/18:1(9Z)/18:1(9Z))[iso3]	C55H100O6			NO	metabo_info.php?molid=4816
4819	895.718	[M+K]+	856.752	2	TG(16:1(9Z)/18:0/18:2(9Z,12Z))[iso6]	C55H100O6			NO	metabo_info.php?molid=4819
4822	895.718	[M+K]+	856.752	2	TG(16:0/18:0/18:3(9Z,12Z,15Z))[iso6]	C55H100O6			NO	metabo_info.php?molid=4822
4831	895.718	[M+K]+	856.752	2	TG(16:1(9Z)/16:1(9Z)/20:1(11Z))[iso3]	C55H100O6			NO	metabo_info.php?molid=4831
4832	895.718	[M+K]+	856.752	2	TG(16:0/16:1(9Z)/20:2(11Z,14Z))[iso6]	C55H100O6			NO	metabo_info.php?molid=4832
4833	895.718	[M+K]+	856.752	2	TG(16:0/16:0/20:3(8Z,11Z,14Z))[iso3]	C55H100O6			NO	metabo_info.php?molid=4833
4847	895.718	[M+K]+	856.752	2	TG(16:1(9Z)/17:2(9Z,12Z)/19:0)[iso6]	C55H100O6			NO	metabo_info.php?molid=4847
61738	895.718	[M+K]+	856.752	2	TG(18:0/16:0/18:3(9Z,12Z,15Z))[iso6]	C55H100O6			NO	metabo_info.php?molid=61738
61745	895.718	[M+K]+	856.752	2	TG(18:1(11Z)/16:0/18:2(9Z,12Z))[iso3]	C55H100O6			NO	metabo_info.php?molid=61745
61748	895.718	[M+K]+	856.752	2	TG(18:1(11Z)/16:1(9Z)/18:1(11Z))[iso3]	C55H100O6			NO	metabo_info.php?molid=61748
61749	895.718	[M+K]+	856.752	2	TG(18:1(11Z)/16:1(9Z)/18:1(9Z))[iso6]	C55H100O6			NO	metabo_info.php?molid=61749
63033	895.718	[M+K]+	856.752	2	1-Palmitoyl-2-oleoyl-3-linoleoyl-rac-glycerol	C55H100O6	2680-59-3		YES	metabo_info.php?molid=63033
98715	895.718	[M+K]+	856.752	2	TG(14:1(9Z)/19:1(9Z)/19:1(9Z))[iso3]	C55H100O6			NO	metabo_info.php?molid=98715
98754	895.718	[M+K]+	856.752	2	TG(15:0/15:0/22:3(10Z,13Z,16Z))[iso3]	C55H100O6			NO	metabo_info.php?molid=98754
98805	895.718	[M+K]+	856.752	2	TG(15:1(9Z)/15:1(9Z)/22:1(11Z))[iso3]	C55H100O6			NO	metabo_info.php?molid=98805
98854	895.718	[M+K]+	856.752	2	TG(17:0/17:0/18:3(6Z,9Z,12Z))[iso3]	C55H100O6			NO	metabo_info.php?molid=98854
99313	895.718	[M+K]+	856.752	2	TG(12:0/18:0/22:3(10Z,13Z,16Z))[iso6]	C55H100O6			NO	metabo_info.php?molid=99313
99332	895.718	[M+K]+	856.752	2	TG(12:0/18:1(9Z)/22:2(13Z,16Z))[iso6]	C55H100O6			NO	metabo_info.php?molid=99332
99350	895.718	[M+K]+	856.752	2	TG(12:0/18:2(9Z,12Z)/22:1(11Z))[iso6]	C55H100O6			NO	metabo_info.php?molid=99350
99367	895.718	[M+K]+	856.752	2	TG(12:0/18:3(6Z,9Z,12Z)/22:0)[iso6]	C55H100O6			NO	metabo_info.php?molid=99367
99384	895.718	[M+K]+	856.752	2	TG(12:0/18:3(9Z,12Z,15Z)/22:0)[iso6]	C55H100O6			NO	metabo_info.php?molid=99384
99438	895.718	[M+K]+	856.752	2	TG(12:0/20:0/20:3(8Z,11Z,14Z))[iso6]	C55H100O6			NO	metabo_info.php?molid=99438
99449	895.718	[M+K]+	856.752	2	TG(12:0/20:1(11Z)/20:2(11Z,14Z))[iso6]	C55H100O6			NO	metabo_info.php?molid=99449
99712	895.718	[M+K]+	856.752	2	TG(13:0/17:0/22:3(10Z,13Z,16Z))[iso6]	C55H100O6			NO	metabo_info.php?molid=99712
99734	895.718	[M+K]+	856.752	2	TG(13:0/17:1(9Z)/22:2(13Z,16Z))[iso6]	C55H100O6			NO	metabo_info.php?molid=99734
99755	895.718	[M+K]+	856.752	2	TG(13:0/17:2(9Z,12Z)/22:1(11Z))[iso6]	C55H100O6			NO	metabo_info.php?molid=99755
99831	895.718	[M+K]+	856.752	2	TG(13:0/18:3(6Z,9Z,12Z)/21:0)[iso6]	C55H100O6			NO	metabo_info.php?molid=99831
99848	895.718	[M+K]+	856.752	2	TG(13:0/18:3(9Z,12Z,15Z)/21:0)[iso6]	C55H100O6			NO	metabo_info.php?molid=99848
99876	895.718	[M+K]+	856.752	2	TG(13:0/19:0/20:3(8Z,11Z,14Z))[iso6]	C55H100O6			NO	metabo_info.php?molid=99876
99889	895.718	[M+K]+	856.752	2	TG(13:0/19:1(9Z)/20:2(11Z,14Z))[iso6]	C55H100O6			NO	metabo_info.php?molid=99889
100098	895.718	[M+K]+	856.752	2	TG(14:0/16:0/22:3(10Z,13Z,16Z))[iso6]	C55H100O6			NO	metabo_info.php?molid=100098
100122	895.718	[M+K]+	856.752	2	TG(14:0/16:1(9Z)/22:2(13Z,16Z))[iso6]	C55H100O6			NO	metabo_info.php?molid=100122
100206	895.718	[M+K]+	856.752	2	TG(14:0/18:0/20:3(8Z,11Z,14Z))[iso6]	C55H100O6			NO	metabo_info.php?molid=100206
100225	895.718	[M+K]+	856.752	2	TG(14:0/18:1(9Z)/20:2(11Z,14Z))[iso6]	C55H100O6			NO	metabo_info.php?molid=100225
100243	895.718	[M+K]+	856.752	2	TG(14:0/18:2(9Z,12Z)/20:1(11Z))[iso6]	C55H100O6			NO	metabo_info.php?molid=100243
100260	895.718	[M+K]+	856.752	2	TG(14:0/18:3(6Z,9Z,12Z)/20:0)[iso6]	C55H100O6			NO	metabo_info.php?molid=100260
100277	895.718	[M+K]+	856.752	2	TG(14:0/18:3(9Z,12Z,15Z)/20:0)[iso6]	C55H100O6			NO	metabo_info.php?molid=100277
100503	895.718	[M+K]+	856.752	2	TG(14:1(9Z)/16:0/22:2(13Z,16Z))[iso6]	C55H100O6			NO	metabo_info.php?molid=100503
100527	895.718	[M+K]+	856.752	2	TG(14:1(9Z)/16:1(9Z)/22:1(11Z))[iso6]	C55H100O6			NO	metabo_info.php?molid=100527
100594	895.718	[M+K]+	856.752	2	TG(14:1(9Z)/17:2(9Z,12Z)/21:0)[iso6]	C55H100O6			NO	metabo_info.php?molid=100594
100611	895.718	[M+K]+	856.752	2	TG(14:1(9Z)/18:0/20:2(11Z,14Z))[iso6]	C55H100O6			NO	metabo_info.php?molid=100611
100630	895.718	[M+K]+	856.752	2	TG(14:1(9Z)/18:1(9Z)/20:1(11Z))[iso6]	C55H100O6			NO	metabo_info.php?molid=100630
100648	895.718	[M+K]+	856.752	2	TG(14:1(9Z)/18:2(9Z,12Z)/20:0)[iso6]	C55H100O6			NO	metabo_info.php?molid=100648
100855	895.718	[M+K]+	856.752	2	TG(15:0/15:1(9Z)/22:2(13Z,16Z))[iso6]	C55H100O6			NO	metabo_info.php?molid=100855
100921	895.718	[M+K]+	856.752	2	TG(15:0/17:0/20:3(8Z,11Z,14Z))[iso6]	C55H100O6			NO	metabo_info.php?molid=100921
100943	895.718	[M+K]+	856.752	2	TG(15:0/17:1(9Z)/20:2(11Z,14Z))[iso6]	C55H100O6			NO	metabo_info.php?molid=100943
100964	895.718	[M+K]+	856.752	2	TG(15:0/17:2(9Z,12Z)/20:1(11Z))[iso6]	C55H100O6			NO	metabo_info.php?molid=100964
101018	895.718	[M+K]+	856.752	2	TG(15:0/18:2(9Z,12Z)/19:1(9Z))[iso6]	C55H100O6			NO	metabo_info.php?molid=101018
101035	895.718	[M+K]+	856.752	2	TG(15:0/18:3(6Z,9Z,12Z)/19:0)[iso6]	C55H100O6			NO	metabo_info.php?molid=101035
101052	895.718	[M+K]+	856.752	2	TG(15:0/18:3(9Z,12Z,15Z)/19:0)[iso6]	C55H100O6			NO	metabo_info.php?molid=101052
101267	895.718	[M+K]+	856.752	2	TG(15:1(9Z)/17:0/20:2(11Z,14Z))[iso6]	C55H100O6			NO	metabo_info.php?molid=101267
101289	895.718	[M+K]+	856.752	2	TG(15:1(9Z)/17:1(9Z)/20:1(11Z))[iso6]	C55H100O6			NO	metabo_info.php?molid=101289
101310	895.718	[M+K]+	856.752	2	TG(15:1(9Z)/17:2(9Z,12Z)/20:0)[iso6]	C55H100O6			NO	metabo_info.php?molid=101310
101350	895.718	[M+K]+	856.752	2	TG(15:1(9Z)/18:1(9Z)/19:1(9Z))[iso6]	C55H100O6			NO	metabo_info.php?molid=101350
101368	895.718	[M+K]+	856.752	2	TG(15:1(9Z)/18:2(9Z,12Z)/19:0)[iso6]	C55H100O6			NO	metabo_info.php?molid=101368
101569	895.718	[M+K]+	856.752	2	TG(16:0/17:2(9Z,12Z)/19:1(9Z))[iso6]	C55H100O6			NO	metabo_info.php?molid=101569
101571	895.718	[M+K]+	856.752	2	TG(16:0/18:0/18:3(6Z,9Z,12Z))[iso6]	C55H100O6			NO	metabo_info.php?molid=101571
101656	895.718	[M+K]+	856.752	2	TG(16:1(9Z)/17:1(9Z)/19:1(9Z))[iso6]	C55H100O6			NO	metabo_info.php?molid=101656
71045	745.384	[M+Na]+	722.4	6	Myxochromide S1	C38H54N6O8		C15714	NO	metabo_info.php?molid=71045
41624	796.526	[M+H]+	795.517	2	C16-OH Sulfatide	C40H77NO12S			NO	metabo_info.php?molid=41624
61098	796.526	[M+Na]+	773.536	1	PE(22:6(4Z,7Z,10Z,13Z,16Z,19Z)/P-18:1(11Z))	C45H76NO7P		C00350	NO	metabo_info.php?molid=61098
61099	796.526	[M+Na]+	773.536	1	PE(22:6(4Z,7Z,10Z,13Z,16Z,19Z)/P-18:1(9Z))	C45H76NO7P		C00350	NO	metabo_info.php?molid=61099
62226	796.526	[M+Na]+	773.536	1	PE(P-18:1(11Z)/22:6(4Z,7Z,10Z,13Z,16Z,19Z))	C45H76NO7P			NO	metabo_info.php?molid=62226
62255	796.526	[M+Na]+	773.536	1	PE(P-18:1(9Z)/22:6(4Z,7Z,10Z,13Z,16Z,19Z))	C45H76NO7P			NO	metabo_info.php?molid=62255
77704	796.526	[M+Na]+	773.536	1	1-(8-[3]-ladderane-octanoyl)-2-(8-[3]-ladderane-octanyl)-sn-glycerophosphoethanolamine	C45H76NO7P			NO	metabo_info.php?molid=77704
40727	796.526	[M+K]+	757.562	1	PE-NMe(18:1(9E)/18:1(9E))	C42H80NO8P			NO	metabo_info.php?molid=40727
40729	796.526	[M+K]+	757.562	1	PE-NMe(18:1(9Z)/18:1(9Z))[U]	C42H80NO8P			NO	metabo_info.php?molid=40729
40734	796.526	[M+K]+	757.562	1	PE-NMe(18:1(9Z)/18:1(9Z))	C42H80NO8P			NO	metabo_info.php?molid=40734
40746	796.526	[M+K]+	757.562	1	PE-NMe(18:1(9E)/18:1(9E))[U]	C42H80NO8P			NO	metabo_info.php?molid=40746
39327	796.526	[M+K]+	757.562	1	PC(16:0/18:2(10E,12Z))	C42H80NO8P			NO	metabo_info.php?molid=39327
39328	796.526	[M+K]+	757.562	1	PC(16:0/18:2(11Z,13Z))	C42H80NO8P			NO	metabo_info.php?molid=39328
39329	796.526	[M+K]+	757.562	1	PC(16:0/18:2(2E,4E))	C42H80NO8P			NO	metabo_info.php?molid=39329
39330	796.526	[M+K]+	757.562	1	PC(16:0/18:2(2Z,4Z))	C42H80NO8P			NO	metabo_info.php?molid=39330
39331	796.526	[M+K]+	757.562	1	PC(16:0/18:2(6Z,9Z))	C42H80NO8P			NO	metabo_info.php?molid=39331
39332	796.526	[M+K]+	757.562	1	PC(16:0/18:2(9E,11E))	C42H80NO8P			NO	metabo_info.php?molid=39332
39333	796.526	[M+K]+	757.562	1	PC(16:0/18:2(9E,11Z))	C42H80NO8P			NO	metabo_info.php?molid=39333
39334	796.526	[M+K]+	757.562	1	PC(16:0/18:2(9E,12E))	C42H80NO8P			NO	metabo_info.php?molid=39334
39335	796.526	[M+K]+	757.562	1	PC(16:0/18:2(9E,12E))[U]	C42H80NO8P			NO	metabo_info.php?molid=39335
39337	796.526	[M+K]+	757.562	1	PC(16:0/18:2(9Z,12Z))[S]	C42H80NO8P			NO	metabo_info.php?molid=39337
39338	796.526	[M+K]+	757.562	1	PC(16:0/18:2(9Z,12Z))[U]	C42H80NO8P			NO	metabo_info.php?molid=39338
39419	796.526	[M+K]+	757.562	1	PC(16:1(2Z)/18:1(9Z))	C42H80NO8P			NO	metabo_info.php?molid=39419
39421	796.526	[M+K]+	757.562	1	PC(16:1(7Z)/18:1(9Z))[U]	C42H80NO8P			NO	metabo_info.php?molid=39421
39430	796.526	[M+K]+	757.562	1	PC(16:1(9Z)/18:1(9Z))[U]	C42H80NO8P			NO	metabo_info.php?molid=39430
39467	796.526	[M+K]+	757.562	1	PC(17:1(10E)/17:1(10E))[U]	C42H80NO8P			NO	metabo_info.php?molid=39467
39468	796.526	[M+K]+	757.562	1	PC(17:1(10Z)/17:1(10Z))	C42H80NO8P			NO	metabo_info.php?molid=39468
39469	796.526	[M+K]+	757.562	1	PC(17:1(9Z)/17:1(9Z))	C42H80NO8P			NO	metabo_info.php?molid=39469
39486	796.526	[M+K]+	757.562	1	PC(18:0/16:2(2E,4E))	C42H80NO8P			NO	metabo_info.php?molid=39486
39627	796.526	[M+K]+	757.562	1	PC(18:1(9Z)/16:1(3E))[U]	C42H80NO8P			NO	metabo_info.php?molid=39627
39661	796.526	[M+K]+	757.562	1	PC(18:2(2E,4E)/16:0)	C42H80NO8P			NO	metabo_info.php?molid=39661
39667	796.526	[M+K]+	757.562	1	PC(18:2(6Z,9Z)/16:0)	C42H80NO8P			NO	metabo_info.php?molid=39667
39674	796.526	[M+K]+	757.562	1	PC(18:2(9Z,12Z)/16:0)[U]	C42H80NO8P			NO	metabo_info.php?molid=39674
59330	796.526	[M+K]+	757.562	1	PC(14:0/20:2(11Z,14Z))	C42H80NO8P		C00157	NO	metabo_info.php?molid=59330
59362	796.526	[M+K]+	757.562	1	PC(14:1(9Z)/20:1(11Z))	C42H80NO8P		C00157	NO	metabo_info.php?molid=59362
59422	796.526	[M+K]+	757.562	1	PC(16:0/18:2(9Z,12Z))	C42H80NO8P		C00157	NO	metabo_info.php?molid=59422
59452	796.526	[M+K]+	757.562	1	PC(16:1(9Z)/18:1(11Z))	C42H80NO8P		C00157	NO	metabo_info.php?molid=59452
59453	796.526	[M+K]+	757.562	1	PC(16:1(9Z)/18:1(9Z))	C42H80NO8P		C00157	NO	metabo_info.php?molid=59453
59515	796.526	[M+K]+	757.562	1	PC(18:1(11Z)/16:1(9Z))	C42H80NO8P		C00157	NO	metabo_info.php?molid=59515
59548	796.526	[M+K]+	757.562	1	PC(18:1(9Z)/16:1(9Z))	C42H80NO8P		C00157	NO	metabo_info.php?molid=59548
59579	796.526	[M+K]+	757.562	1	PC(18:2(9Z,12Z)/16:0)	C42H80NO8P		C00157	NO	metabo_info.php?molid=59579
59742	796.526	[M+K]+	757.562	1	PC(20:1(11Z)/14:1(9Z))	C42H80NO8P		C00157	NO	metabo_info.php?molid=59742
59774	796.526	[M+K]+	757.562	1	PC(20:2(11Z,14Z)/14:0)	C42H80NO8P		C00157	NO	metabo_info.php?molid=59774
60352	796.526	[M+K]+	757.562	1	PE(15:0/22:2(13Z,16Z))	C42H80NO8P		C00350	NO	metabo_info.php?molid=60352
60938	796.526	[M+K]+	757.562	1	PE(22:2(13Z,16Z)/15:0)	C42H80NO8P		C00350	NO	metabo_info.php?molid=60938
75616	796.526	[M+K]+	757.562	1	PC(12:0/22:2(13Z,16Z))	C42H80NO8P			NO	metabo_info.php?molid=75616
75729	796.526	[M+K]+	757.562	1	PC(15:1(9Z)/19:1(9Z))	C42H80NO8P			NO	metabo_info.php?molid=75729
75784	796.526	[M+K]+	757.562	1	PC(17:0/17:2(9Z,12Z))	C42H80NO8P			NO	metabo_info.php?molid=75784
75839	796.526	[M+K]+	757.562	1	PC(17:2(9Z,12Z)/17:0)	C42H80NO8P			NO	metabo_info.php?molid=75839
76041	796.526	[M+K]+	757.562	1	PC(19:1(9Z)/15:1(9Z))	C42H80NO8P			NO	metabo_info.php?molid=76041
76315	796.526	[M+K]+	757.562	1	PC(22:2(13Z,16Z)/12:0)	C42H80NO8P			NO	metabo_info.php?molid=76315
76736	796.526	[M+K]+	757.562	1	PE(15:1(9Z)/22:1(11Z))	C42H80NO8P			NO	metabo_info.php?molid=76736
76788	796.526	[M+K]+	757.562	1	PE(17:0/20:2(11Z,14Z))	C42H80NO8P			NO	metabo_info.php?molid=76788
76815	796.526	[M+K]+	757.562	1	PE(17:1(9Z)/20:1(11Z))	C42H80NO8P			NO	metabo_info.php?molid=76815
76844	796.526	[M+K]+	757.562	1	PE(17:2(9Z,12Z)/20:0)	C42H80NO8P			NO	metabo_info.php?molid=76844
76881	796.526	[M+K]+	757.562	1	PE(18:1(9Z)/19:1(9Z))	C42H80NO8P			NO	metabo_info.php?molid=76881
76902	796.526	[M+K]+	757.562	1	PE(18:2(9Z,12Z)/19:0)	C42H80NO8P			NO	metabo_info.php?molid=76902
77011	796.526	[M+K]+	757.562	1	PE(19:0/18:2(9Z,12Z))	C42H80NO8P			NO	metabo_info.php?molid=77011
77040	796.526	[M+K]+	757.562	1	PE(19:1(9Z)/18:1(9Z))	C42H80NO8P			NO	metabo_info.php?molid=77040
77065	796.526	[M+K]+	757.562	1	PE(20:0/17:2(9Z,12Z))	C42H80NO8P			NO	metabo_info.php?molid=77065
77085	796.526	[M+K]+	757.562	1	PE(20:1(11Z)/17:1(9Z))	C42H80NO8P			NO	metabo_info.php?molid=77085
77114	796.526	[M+K]+	757.562	1	PE(20:2(11Z,14Z)/17:0)	C42H80NO8P			NO	metabo_info.php?molid=77114
77280	796.526	[M+K]+	757.562	1	PE(22:1(11Z)/15:1(9Z))	C42H80NO8P			NO	metabo_info.php?molid=77280
44406	679.148	[M+Na]+	656.156	4	TENIPOSIDE	C32H32O13S	29767-20-2	C11153	YES	metabo_info.php?molid=44406
50031	679.148	[M+Na]+	656.159	0	3,6,7,8,3\',4\'-Hexahydroxy-5\'-methoxyflavone 7-neohesperidoside	C28H32O18			NO	metabo_info.php?molid=50031
50889	679.148	[M+Na]+	656.159	0	Laricitrin 3,5\'-diglucoside	C28H32O18			NO	metabo_info.php?molid=50889
50915	679.148	[M+Na]+	656.159	0	Mearnsetin 3-galactosyl-(1->4)-galactoside	C28H32O18			NO	metabo_info.php?molid=50915
51305	679.148	[M+Na]+	656.159	0	Patuletin 3-gentiobioside	C28H32O18			NO	metabo_info.php?molid=51305
51307	679.148	[M+Na]+	656.159	0	Patuletin 3,7-diglucoside	C28H32O18			NO	metabo_info.php?molid=51307
51379	679.148	[M+Na]+	656.159	0	Quercetagetin 7-methyl ether 3-cellobioside	C28H32O18			NO	metabo_info.php?molid=51379
51588	679.148	[M+Na]+	656.159	0	Ranupenin 3-galactoside-8-glucoside	C28H32O18			NO	metabo_info.php?molid=51588
51598	679.148	[M+Na]+	656.159	0	Corniculatusin 3,7-diglucoside	C28H32O18			NO	metabo_info.php?molid=51598
67494	679.148	[M+K]+	640.179	8	Chartreusin	C32H32O14	6377-18-0	C09181	YES	metabo_info.php?molid=67494
86251	679.148	[M+K]+	640.183	2	Bis-gamma-glutamylcysteinylbis-beta-alanine	C22H36N6O12S2			NO	metabo_info.php?molid=86251
68901	737.454	[M+H]+	736.44	9	Nonactin	C40H64O12	6833-84-7	C11186	NO	metabo_info.php?molid=68901
65449	737.454	[M+H]+	736.441	7	Antanapeptin A	C41H60N4O8			YES	metabo_info.php?molid=65449
81300	737.454	[M+K]+	698.489	3	PA(14:1(9Z)/22:2(13Z,16Z))	C39H71O8P			NO	metabo_info.php?molid=81300
81382	737.454	[M+K]+	698.489	3	PA(16:1(9Z)/20:2(11Z,14Z))	C39H71O8P			NO	metabo_info.php?molid=81382
81459	737.454	[M+K]+	698.489	3	PA(17:2(9Z,12Z)/19:1(9Z))	C39H71O8P			NO	metabo_info.php?molid=81459
81479	737.454	[M+K]+	698.489	3	PA(18:0/18:3(6Z,9Z,12Z))	C39H71O8P			NO	metabo_info.php?molid=81479
81480	737.454	[M+K]+	698.489	3	PA(18:0/18:3(9Z,12Z,15Z))	C39H71O8P			NO	metabo_info.php?molid=81480
81514	737.454	[M+K]+	698.489	3	PA(18:2(9Z,12Z)/18:1(9Z))	C39H71O8P			NO	metabo_info.php?molid=81514
81541	737.454	[M+K]+	698.489	3	PA(18:3(6Z,9Z,12Z)/18:0)	C39H71O8P			NO	metabo_info.php?molid=81541
81571	737.454	[M+K]+	698.489	3	PA(18:3(9Z,12Z,15Z)/18:0)	C39H71O8P			NO	metabo_info.php?molid=81571
81654	737.454	[M+K]+	698.489	3	PA(19:1(9Z)/17:2(9Z,12Z))	C39H71O8P			NO	metabo_info.php?molid=81654
81729	737.454	[M+K]+	698.489	3	PA(20:2(11Z,14Z)/16:1(9Z))	C39H71O8P			NO	metabo_info.php?molid=81729
81759	737.454	[M+K]+	698.489	3	PA(20:3(8Z,11Z,14Z)/16:0)	C39H71O8P			NO	metabo_info.php?molid=81759
81924	737.454	[M+K]+	698.489	3	PA(22:2(13Z,16Z)/14:1(9Z))	C39H71O8P			NO	metabo_info.php?molid=81924
82071	737.454	[M+K]+	698.489	3	PA(16:0/20:3(8Z,11Z,14Z))	C39H71O8P			NO	metabo_info.php?molid=82071
82127	737.454	[M+K]+	698.489	3	PA(18:1(9Z)/18:2(9Z,12Z))	C39H71O8P			NO	metabo_info.php?molid=82127
36062	239.165	[M+H]+	238.157	1	(9R,13R)-1a,1b-dihomo-jasmonic acid	C14H22O3			NO	metabo_info.php?molid=36062
36063	239.165	[M+H]+	238.157	1	(9S,13S)-1a,1b-dihomo-jasmonic acid	C14H22O3			NO	metabo_info.php?molid=36063
45867	239.165	[M+H]+	238.157	1	7-oxo-11E,13-Tetradecadienoic acid	C14H22O3			NO	metabo_info.php?molid=45867
53442	239.165	[M+H]+	238.157	1	Sundiversifolide	C14H22O3			NO	metabo_info.php?molid=53442
92981	239.165	[M+H]+	238.157	1	Geranyl acetoacetate	C14H22O3	10032-00-5		NO	metabo_info.php?molid=92981
36130	379.285	[M+H]+	378.277	0	9-deoxy-9-methylene-16,16-dimethyl -PGE2	C23H38O4	61263-35-2		YES	metabo_info.php?molid=36130
43153	379.285	[M+H]+	378.277	0	3&alpha
43423	379.285	[M+H]+	378.277	0	MG(0:0/20:4(5Z,8Z,11Z,14Z)/0:0)	C23H38O4	53847-30-6	C13856	NO	metabo_info.php?molid=43423
62332	379.285	[M+H]+	378.277	0	MG(0:0/20:4(8Z,11Z,14Z,17Z)/0:0)	C23H38O4			NO	metabo_info.php?molid=62332
62360	379.285	[M+H]+	378.277	0	1-AG	C23H38O4	35474-99-8	C13857	YES	metabo_info.php?molid=62360
62361	379.285	[M+H]+	378.277	0	MG(20:4(8Z,11Z,14Z,17Z)/0:0/0:0)	C23H38O4			NO	metabo_info.php?molid=62361
84907	379.285	[M+H]+	378.277	0	3alpha,7alpha,12alpha-Trihydroxy-24-nor-5beta-cholan-23-al	C23H38O4			NO	metabo_info.php?molid=84907
90580	379.285	[M+H]+	378.277	0	1-Acetoxy-2-hydroxy-5,12,15-heneicosatrien-4-one	C23H38O4			NO	metabo_info.php?molid=90580
84917	379.285	[M+H]+	378.277	0	Norchenodeoxycholic acid	C23H38O4			NO	metabo_info.php?molid=84917
91500	379.285	[M+H]+	378.277	0	[12]-Gingerol	C23H38O4	104264-55-3		YES	metabo_info.php?molid=91500
91642	379.285	[M+H]+	378.277	0	Persenone A	C23H38O4			NO	metabo_info.php?molid=91642
35988	379.285	[M+Na]+	356.293	7	Heneicosanedioic acid	C21H40O4			NO	metabo_info.php?molid=35988
62320	379.285	[M+Na]+	356.293	7	MG(0:0/18:1(11Z)/0:0)	C21H40O4			NO	metabo_info.php?molid=62320
62321	379.285	[M+Na]+	356.293	7	MG(0:0/18:1(9Z)/0:0)	C21H40O4	3443-84-3		YES	metabo_info.php?molid=62321
62348	379.285	[M+Na]+	356.293	7	MG(18:1(11Z)/0:0/0:0)	C21H40O4			NO	metabo_info.php?molid=62348
62349	379.285	[M+Na]+	356.293	7	MG(18:1(9Z)/0:0/0:0)	C21H40O4			NO	metabo_info.php?molid=62349
89215	379.285	[M+Na]+	356.293	7	Stearoyllactic acid	C21H40O4	4253-64-9		NO	metabo_info.php?molid=89215
89668	379.285	[M+Na]+	356.293	7	3-(2-Heptenyloxy)-2-hydroxypropyl undecanoate	C21H40O4			NO	metabo_info.php?molid=89668
4251	379.285	[M+Na]+	356.293	7	MG(18:1(9Z)/0:0/0:0)[rac]	C21H40O4	111-03-5		YES	metabo_info.php?molid=4251
4250	379.285	[M+Na]+	356.293	7	MG(18:1(11E)/0:0/0:0)[rac]	C21H40O4			NO	metabo_info.php?molid=4250
85234	379.285	[M+K]+	340.322	0	9-Hexadecenoylcholine	C21H42NO2			NO	metabo_info.php?molid=85234
103712	372.188	[M+H]+	371.18	0	Ala Ala Asn Pro	C15H25N5O6			NO	metabo_info.php?molid=103712
103731	372.188	[M+H]+	371.18	0	Ala Ala Pro Asn	C15H25N5O6			NO	metabo_info.php?molid=103731
105733	372.188	[M+H]+	371.18	0	Ala Gly Pro Gln	C15H25N5O6			NO	metabo_info.php?molid=105733
105752	372.188	[M+H]+	371.18	0	Ala Gly Gln Pro	C15H25N5O6			NO	metabo_info.php?molid=105752
107892	372.188	[M+H]+	371.18	0	Ala Asn Ala Pro	C15H25N5O6			NO	metabo_info.php?molid=107892
108120	372.188	[M+H]+	371.18	0	Ala Asn Pro Ala	C15H25N5O6			NO	metabo_info.php?molid=108120
108291	372.188	[M+H]+	371.18	0	Ala Pro Ala Asn	C15H25N5O6			NO	metabo_info.php?molid=108291
108393	372.188	[M+H]+	371.18	0	Ala Pro Gly Gln	C15H25N5O6			NO	metabo_info.php?molid=108393
108500	372.188	[M+H]+	371.18	0	Ala Pro Asn Ala	C15H25N5O6			NO	metabo_info.php?molid=108500
108545	372.188	[M+H]+	371.18	0	Ala Pro Gln Gly	C15H25N5O6			NO	metabo_info.php?molid=108545
108792	372.188	[M+H]+	371.18	0	Ala Gln Gly Pro	C15H25N5O6			NO	metabo_info.php?molid=108792
108925	372.188	[M+H]+	371.18	0	Ala Gln Pro Gly	C15H25N5O6			NO	metabo_info.php?molid=108925
143732	372.188	[M+H]+	371.18	0	Gly Ala Pro Gln	C15H25N5O6			NO	metabo_info.php?molid=143732
143751	372.188	[M+H]+	371.18	0	Gly Ala Gln Pro	C15H25N5O6			NO	metabo_info.php?molid=143751
148292	372.188	[M+H]+	371.18	0	Gly Pro Ala Gln	C15H25N5O6			NO	metabo_info.php?molid=148292
148539	372.188	[M+H]+	371.18	0	Gly Pro Gln Ala	C15H25N5O6			NO	metabo_info.php?molid=148539
148691	372.188	[M+H]+	371.18	0	Gly Gln Ala Pro	C15H25N5O6			NO	metabo_info.php?molid=148691
148919	372.188	[M+H]+	371.18	0	Gly Gln Pro Ala	C15H25N5O6			NO	metabo_info.php?molid=148919
191491	372.188	[M+H]+	371.18	0	Asn Ala Ala Pro	C15H25N5O6			NO	metabo_info.php?molid=191491
191719	372.188	[M+H]+	371.18	0	Asn Ala Pro Ala	C15H25N5O6			NO	metabo_info.php?molid=191719
196279	372.188	[M+H]+	371.18	0	Asn Pro Ala Ala	C15H25N5O6			NO	metabo_info.php?molid=196279
199490	372.188	[M+H]+	371.18	0	Pro Ala Ala Asn	C15H25N5O6			NO	metabo_info.php?molid=199490
199592	372.188	[M+H]+	371.18	0	Pro Ala Gly Gln	C15H25N5O6			NO	metabo_info.php?molid=199592
199699	372.188	[M+H]+	371.18	0	Pro Ala Asn Ala	C15H25N5O6			NO	metabo_info.php?molid=199699
199744	372.188	[M+H]+	371.18	0	Pro Ala Gln Gly	C15H25N5O6			NO	metabo_info.php?molid=199744
201492	372.188	[M+H]+	371.18	0	Pro Gly Ala Gln	C15H25N5O6			NO	metabo_info.php?molid=201492
201739	372.188	[M+H]+	371.18	0	Pro Gly Gln Ala	C15H25N5O6			NO	metabo_info.php?molid=201739
203879	372.188	[M+H]+	371.18	0	Pro Asn Ala Ala	C15H25N5O6			NO	metabo_info.php?molid=203879
204684	372.188	[M+H]+	371.18	0	Pro Gln Ala Gly	C15H25N5O6			NO	metabo_info.php?molid=204684
204779	372.188	[M+H]+	371.18	0	Pro Gln Gly Ala	C15H25N5O6			NO	metabo_info.php?molid=204779
207591	372.188	[M+H]+	371.18	0	Gln Ala Gly Pro	C15H25N5O6			NO	metabo_info.php?molid=207591
207724	372.188	[M+H]+	371.18	0	Gln Ala Pro Gly	C15H25N5O6			NO	metabo_info.php?molid=207724
209491	372.188	[M+H]+	371.18	0	Gln Gly Ala Pro	C15H25N5O6			NO	metabo_info.php?molid=209491
209719	372.188	[M+H]+	371.18	0	Gln Gly Pro Ala	C15H25N5O6			NO	metabo_info.php?molid=209719
212284	372.188	[M+H]+	371.18	0	Gln Pro Ala Gly	C15H25N5O6			NO	metabo_info.php?molid=212284
212379	372.188	[M+H]+	371.18	0	Gln Pro Gly Ala	C15H25N5O6			NO	metabo_info.php?molid=212379
23125	372.188	[M+H]+	371.18	0	Gln Gln Pro	C15H25N5O6			NO	metabo_info.php?molid=23125
22103	372.188	[M+H]+	371.18	0	Pro Gln Gln	C15H25N5O6			YES	metabo_info.php?molid=22103
21823	372.188	[M+H]+	371.18	0	Gln Pro Gln	C15H25N5O6			YES	metabo_info.php?molid=21823
86104	372.188	[M+Na]+	349.2	4	Coutaric acid	C18H27N3O4			NO	metabo_info.php?molid=86104
22352	372.188	[M+Na]+	349.2	4	Phe Ile Ala	C18H27N3O4			YES	metabo_info.php?molid=22352
22050	372.188	[M+Na]+	349.2	4	Ala Ile Phe	C18H27N3O4			YES	metabo_info.php?molid=22050
22011	372.188	[M+Na]+	349.2	4	Phe Ala Ile	C18H27N3O4			YES	metabo_info.php?molid=22011
20028	372.188	[M+Na]+	349.2	4	Ala Phe Ile	C18H27N3O4			YES	metabo_info.php?molid=20028
19711	372.188	[M+Na]+	349.2	4	Leu Phe Ala	C18H27N3O4			YES	metabo_info.php?molid=19711
19307	372.188	[M+Na]+	349.2	4	Phe Leu Ala	C18H27N3O4			YES	metabo_info.php?molid=19307
18996	372.188	[M+Na]+	349.2	4	Ala Phe Leu	C18H27N3O4			YES	metabo_info.php?molid=18996
17138	372.188	[M+Na]+	349.2	4	Leu Ala Phe	C18H27N3O4			YES	metabo_info.php?molid=17138
16845	372.188	[M+Na]+	349.2	4	Ala Leu Phe	C18H27N3O4			YES	metabo_info.php?molid=16845
16554	372.188	[M+Na]+	349.2	4	Ile Phe Ala	C18H27N3O4			YES	metabo_info.php?molid=16554
16053	372.188	[M+Na]+	349.2	4	Phe Ala Leu	C18H27N3O4			YES	metabo_info.php?molid=16053
15688	372.188	[M+Na]+	349.2	4	Ile Ala Phe	C18H27N3O4			NO	metabo_info.php?molid=15688
94395	372.188	[M+K]+	333.228	8	3-Oxotetradecanoic acid glycerides	C17H33O6	128331-49-7		NO	metabo_info.php?molid=94395
68809	363.972	[M+Na]+	340.986	7	Bifenox	C14H9Cl2NO5	42576-02-3	C11066	NO	metabo_info.php?molid=68809
137170	613.251	[M+Na]+	590.256	8	Phe Phe Phe Met	C32H38N4O5S			NO	metabo_info.php?molid=137170
137284	613.251	[M+Na]+	590.256	8	Phe Phe Met Phe	C32H38N4O5S			NO	metabo_info.php?molid=137284
139563	613.251	[M+Na]+	590.256	8	Phe Met Phe Phe	C32H38N4O5S			NO	metabo_info.php?molid=139563
185163	613.251	[M+Na]+	590.256	8	Met Phe Phe Phe	C32H38N4O5S			NO	metabo_info.php?molid=185163
264836	613.251	[M+Na]+	590.266	7	Ala Arg Asp Glu Thr	C22H38N8O11			YES	metabo_info.php?molid=264836
120974	613.251	[M+K]+	574.282	8	Asp Glu Arg Arg	C21H38N10O9			NO	metabo_info.php?molid=120974
125154	613.251	[M+K]+	574.282	8	Asp Arg Glu Arg	C21H38N10O9			NO	metabo_info.php?molid=125154
125363	613.251	[M+K]+	574.282	8	Asp Arg Arg Glu	C21H38N10O9			NO	metabo_info.php?molid=125363
128574	613.251	[M+K]+	574.282	8	Glu Asp Arg Arg	C21H38N10O9			YES	metabo_info.php?molid=128574
133134	613.251	[M+K]+	574.282	8	Glu Arg Asp Arg	C21H38N10O9			NO	metabo_info.php?molid=133134
133362	613.251	[M+K]+	574.282	8	Glu Arg Arg Asp	C21H38N10O9			NO	metabo_info.php?molid=133362
216353	613.251	[M+K]+	574.282	8	Arg Asp Glu Arg	C21H38N10O9			NO	metabo_info.php?molid=216353
216562	613.251	[M+K]+	574.282	8	Arg Asp Arg Glu	C21H38N10O9			NO	metabo_info.php?molid=216562
216733	613.251	[M+K]+	574.282	8	Arg Glu Asp Arg	C21H38N10O9			YES	metabo_info.php?molid=216733
216961	613.251	[M+K]+	574.282	8	Arg Glu Arg Asp	C21H38N10O9			NO	metabo_info.php?molid=216961
221122	613.251	[M+K]+	574.282	8	Arg Arg Asp Glu	C21H38N10O9			NO	metabo_info.php?molid=221122
221141	613.251	[M+K]+	574.282	8	Arg Arg Glu Asp	C21H38N10O9			NO	metabo_info.php?molid=221141
125438	613.251	[M+K]+	574.286	2	Asp Arg Val Trp	C26H38N8O7			NO	metabo_info.php?molid=125438
125457	613.251	[M+K]+	574.286	2	Asp Arg Trp Val	C26H38N8O7			NO	metabo_info.php?molid=125457
126578	613.251	[M+K]+	574.286	2	Asp Val Arg Trp	C26H38N8O7			NO	metabo_info.php?molid=126578
126654	613.251	[M+K]+	574.286	2	Asp Val Trp Arg	C26H38N8O7			NO	metabo_info.php?molid=126654
126977	613.251	[M+K]+	574.286	2	Asp Trp Arg Val	C26H38N8O7			NO	metabo_info.php?molid=126977
127034	613.251	[M+K]+	574.286	2	Asp Trp Val Arg	C26H38N8O7			NO	metabo_info.php?molid=127034
154958	613.251	[M+K]+	574.286	2	His Lys Gln Tyr	C26H38N8O7			NO	metabo_info.php?molid=154958
155072	613.251	[M+K]+	574.286	2	His Lys Tyr Gln	C26H38N8O7			NO	metabo_info.php?molid=155072
156858	613.251	[M+K]+	574.286	2	His Gln Lys Tyr	C26H38N8O7			NO	metabo_info.php?molid=156858
157067	613.251	[M+K]+	574.286	2	His Gln Tyr Lys	C26H38N8O7			NO	metabo_info.php?molid=157067
159252	613.251	[M+K]+	574.286	2	His Tyr Lys Gln	C26H38N8O7			NO	metabo_info.php?molid=159252
159347	613.251	[M+K]+	574.286	2	His Tyr Gln Lys	C26H38N8O7			NO	metabo_info.php?molid=159347
170158	613.251	[M+K]+	574.286	2	Lys His Gln Tyr	C26H38N8O7			NO	metabo_info.php?molid=170158
170272	613.251	[M+K]+	574.286	2	Lys His Tyr Gln	C26H38N8O7			NO	metabo_info.php?molid=170272
172157	613.251	[M+K]+	574.286	2	Lys Asn Gln Trp	C26H38N8O7			NO	metabo_info.php?molid=172157
172252	613.251	[M+K]+	574.286	2	Lys Asn Trp Gln	C26H38N8O7			NO	metabo_info.php?molid=172252
172818	613.251	[M+K]+	574.286	2	Lys Gln His Tyr	C26H38N8O7			NO	metabo_info.php?molid=172818
172917	613.251	[M+K]+	574.286	2	Lys Gln Asn Trp	C26H38N8O7			NO	metabo_info.php?molid=172917
173050	613.251	[M+K]+	574.286	2	Lys Gln Trp Asn	C26H38N8O7			NO	metabo_info.php?molid=173050
173065	613.251	[M+K]+	574.286	2	Lys Gln Tyr His	C26H38N8O7			NO	metabo_info.php?molid=173065
174912	613.251	[M+K]+	574.286	2	Lys Trp Asn Gln	C26H38N8O7			NO	metabo_info.php?molid=174912
174950	613.251	[M+K]+	574.286	2	Lys Trp Gln Asn	C26H38N8O7			NO	metabo_info.php?molid=174950
175212	613.251	[M+K]+	574.286	2	Lys Tyr His Gln	C26H38N8O7			NO	metabo_info.php?molid=175212
175345	613.251	[M+K]+	574.286	2	Lys Tyr Gln His	C26H38N8O7			NO	metabo_info.php?molid=175345
194957	613.251	[M+K]+	574.286	2	Asn Lys Gln Trp	C26H38N8O7			NO	metabo_info.php?molid=194957
195052	613.251	[M+K]+	574.286	2	Asn Lys Trp Gln	C26H38N8O7			NO	metabo_info.php?molid=195052
196857	613.251	[M+K]+	574.286	2	Asn Gln Lys Trp	C26H38N8O7			NO	metabo_info.php?molid=196857
197047	613.251	[M+K]+	574.286	2	Asn Gln Trp Lys	C26H38N8O7			NO	metabo_info.php?molid=197047
198852	613.251	[M+K]+	574.286	2	Asn Trp Lys Gln	C26H38N8O7			NO	metabo_info.php?molid=198852
198947	613.251	[M+K]+	574.286	2	Asn Trp Gln Lys	C26H38N8O7			NO	metabo_info.php?molid=198947
210058	613.251	[M+K]+	574.286	2	Gln His Lys Tyr	C26H38N8O7			NO	metabo_info.php?molid=210058
210267	613.251	[M+K]+	574.286	2	Gln His Tyr Lys	C26H38N8O7			NO	metabo_info.php?molid=210267
210818	613.251	[M+K]+	574.286	2	Gln Lys His Tyr	C26H38N8O7			NO	metabo_info.php?molid=210818
210917	613.251	[M+K]+	574.286	2	Gln Lys Asn Trp	C26H38N8O7			NO	metabo_info.php?molid=210917
211050	613.251	[M+K]+	574.286	2	Gln Lys Trp Asn	C26H38N8O7			NO	metabo_info.php?molid=211050
211065	613.251	[M+K]+	574.286	2	Gln Lys Tyr His	C26H38N8O7			NO	metabo_info.php?molid=211065
212057	613.251	[M+K]+	574.286	2	Gln Asn Lys Trp	C26H38N8O7			NO	metabo_info.php?molid=212057
212247	613.251	[M+K]+	574.286	2	Gln Asn Trp Lys	C26H38N8O7			NO	metabo_info.php?molid=212247
214850	613.251	[M+K]+	574.286	2	Gln Trp Lys Asn	C26H38N8O7			NO	metabo_info.php?molid=214850
214907	613.251	[M+K]+	574.286	2	Gln Trp Asn Lys	C26H38N8O7			NO	metabo_info.php?molid=214907
215207	613.251	[M+K]+	574.286	2	Gln Tyr His Lys	C26H38N8O7			NO	metabo_info.php?molid=215207
215245	613.251	[M+K]+	574.286	2	Gln Tyr Lys His	C26H38N8O7			NO	metabo_info.php?molid=215245
216637	613.251	[M+K]+	574.286	2	Arg Asp Val Trp	C26H38N8O7			NO	metabo_info.php?molid=216637
216656	613.251	[M+K]+	574.286	2	Arg Asp Trp Val	C26H38N8O7			NO	metabo_info.php?molid=216656
222337	613.251	[M+K]+	574.286	2	Arg Val Asp Trp	C26H38N8O7			NO	metabo_info.php?molid=222337
222641	613.251	[M+K]+	574.286	2	Arg Val Trp Asp	C26H38N8O7			NO	metabo_info.php?molid=222641
222736	613.251	[M+K]+	574.286	2	Arg Trp Asp Val	C26H38N8O7			NO	metabo_info.php?molid=222736
223021	613.251	[M+K]+	574.286	2	Arg Trp Val Asp	C26H38N8O7			NO	metabo_info.php?molid=223021
240577	613.251	[M+K]+	574.286	2	Val Asp Arg Trp	C26H38N8O7			NO	metabo_info.php?molid=240577
240653	613.251	[M+K]+	574.286	2	Val Asp Trp Arg	C26H38N8O7			NO	metabo_info.php?molid=240653
245137	613.251	[M+K]+	574.286	2	Val Arg Asp Trp	C26H38N8O7			NO	metabo_info.php?molid=245137
245441	613.251	[M+K]+	574.286	2	Val Arg Trp Asp	C26H38N8O7			NO	metabo_info.php?molid=245441
246733	613.251	[M+K]+	574.286	2	Val Trp Asp Arg	C26H38N8O7			NO	metabo_info.php?molid=246733
246961	613.251	[M+K]+	574.286	2	Val Trp Arg Asp	C26H38N8O7			NO	metabo_info.php?molid=246961
248576	613.251	[M+K]+	574.286	2	Trp Asp Arg Val	C26H38N8O7			NO	metabo_info.php?molid=248576
248633	613.251	[M+K]+	574.286	2	Trp Asp Val Arg	C26H38N8O7			NO	metabo_info.php?molid=248633
250912	613.251	[M+K]+	574.286	2	Trp Lys Asn Gln	C26H38N8O7			NO	metabo_info.php?molid=250912
250950	613.251	[M+K]+	574.286	2	Trp Lys Gln Asn	C26H38N8O7			NO	metabo_info.php?molid=250950
252052	613.251	[M+K]+	574.286	2	Trp Asn Lys Gln	C26H38N8O7			NO	metabo_info.php?molid=252052
252147	613.251	[M+K]+	574.286	2	Trp Asn Gln Lys	C26H38N8O7			NO	metabo_info.php?molid=252147
252850	613.251	[M+K]+	574.286	2	Trp Gln Lys Asn	C26H38N8O7			NO	metabo_info.php?molid=252850
252907	613.251	[M+K]+	574.286	2	Trp Gln Asn Lys	C26H38N8O7			NO	metabo_info.php?molid=252907
253136	613.251	[M+K]+	574.286	2	Trp Arg Asp Val	C26H38N8O7			NO	metabo_info.php?molid=253136
253421	613.251	[M+K]+	574.286	2	Trp Arg Val Asp	C26H38N8O7			NO	metabo_info.php?molid=253421
254333	613.251	[M+K]+	574.286	2	Trp Val Asp Arg	C26H38N8O7			NO	metabo_info.php?molid=254333
254561	613.251	[M+K]+	574.286	2	Trp Val Arg Asp	C26H38N8O7			NO	metabo_info.php?molid=254561
258052	613.251	[M+K]+	574.286	2	Tyr His Lys Gln	C26H38N8O7			NO	metabo_info.php?molid=258052
258147	613.251	[M+K]+	574.286	2	Tyr His Gln Lys	C26H38N8O7			NO	metabo_info.php?molid=258147
258812	613.251	[M+K]+	574.286	2	Tyr Lys His Gln	C26H38N8O7			NO	metabo_info.php?molid=258812
258945	613.251	[M+K]+	574.286	2	Tyr Lys Gln His	C26H38N8O7			NO	metabo_info.php?molid=258945
260807	613.251	[M+K]+	574.286	2	Tyr Gln His Lys	C26H38N8O7			NO	metabo_info.php?molid=260807
260845	613.251	[M+K]+	574.286	2	Tyr Gln Lys His	C26H38N8O7			NO	metabo_info.php?molid=260845
68926	613.251	[M+K]+	574.289	2	Herbimycin	C30H42N2O9	70563-58-5	C11225	NO	metabo_info.php?molid=68926
106658	613.251	[M+K]+	574.29	4	Ala Ile Trp Trp	C31H38N6O5			NO	metabo_info.php?molid=106658
107458	613.251	[M+K]+	574.29	4	Ala Leu Trp Trp	C31H38N6O5			NO	metabo_info.php?molid=107458
110838	613.251	[M+K]+	574.29	4	Ala Trp Ile Trp	C31H38N6O5			NO	metabo_info.php?molid=110838
110878	613.251	[M+K]+	574.29	4	Ala Trp Leu Trp	C31H38N6O5			NO	metabo_info.php?molid=110878
111047	613.251	[M+K]+	574.29	4	Ala Trp Trp Ile	C31H38N6O5			NO	metabo_info.php?molid=111047
111049	613.251	[M+K]+	574.29	4	Ala Trp Trp Leu	C31H38N6O5			NO	metabo_info.php?molid=111049
159857	613.251	[M+K]+	574.29	4	Ile Ala Trp Trp	C31H38N6O5			NO	metabo_info.php?molid=159857
166697	613.251	[M+K]+	574.29	4	Ile Trp Ala Trp	C31H38N6O5			NO	metabo_info.php?molid=166697
167039	613.251	[M+K]+	574.29	4	Ile Trp Trp Ala	C31H38N6O5			NO	metabo_info.php?molid=167039
175857	613.251	[M+K]+	574.29	4	Leu Ala Trp Trp	C31H38N6O5			NO	metabo_info.php?molid=175857
182697	613.251	[M+K]+	574.29	4	Leu Trp Ala Trp	C31H38N6O5			NO	metabo_info.php?molid=182697
183039	613.251	[M+K]+	574.29	4	Leu Trp Trp Ala	C31H38N6O5			NO	metabo_info.php?molid=183039
247637	613.251	[M+K]+	574.29	4	Trp Ala Ile Trp	C31H38N6O5			NO	metabo_info.php?molid=247637
247677	613.251	[M+K]+	574.29	4	Trp Ala Leu Trp	C31H38N6O5			NO	metabo_info.php?molid=247677
247846	613.251	[M+K]+	574.29	4	Trp Ala Trp Ile	C31H38N6O5			NO	metabo_info.php?molid=247846
247848	613.251	[M+K]+	574.29	4	Trp Ala Trp Leu	C31H38N6O5			NO	metabo_info.php?molid=247848
250297	613.251	[M+K]+	574.29	4	Trp Ile Ala Trp	C31H38N6O5			NO	metabo_info.php?molid=250297
250639	613.251	[M+K]+	574.29	4	Trp Ile Trp Ala	C31H38N6O5			NO	metabo_info.php?molid=250639
251097	613.251	[M+K]+	574.29	4	Trp Leu Ala Trp	C31H38N6O5			NO	metabo_info.php?molid=251097
251439	613.251	[M+K]+	574.29	4	Trp Leu Trp Ala	C31H38N6O5			NO	metabo_info.php?molid=251439
254686	613.251	[M+K]+	574.29	4	Trp Trp Ala Ile	C31H38N6O5			NO	metabo_info.php?molid=254686
254688	613.251	[M+K]+	574.29	4	Trp Trp Ala Leu	C31H38N6O5			NO	metabo_info.php?molid=254688
254819	613.251	[M+K]+	574.29	4	Trp Trp Ile Ala	C31H38N6O5			NO	metabo_info.php?molid=254819
254859	613.251	[M+K]+	574.29	4	Trp Trp Leu Ala	C31H38N6O5			NO	metabo_info.php?molid=254859
36897	877.729	[M+H]+	876.721	1	TG(17:2(9Z,12Z)/17:2(9Z,12Z)/20:3(8Z,11Z,14Z))[iso3]	C57H96O6			NO	metabo_info.php?molid=36897
36901	877.729	[M+H]+	876.721	1	TG(17:1(9Z)/17:2(9Z,12Z)/20:4(5Z,8Z,11Z,14Z))[iso6]	C57H96O6			NO	metabo_info.php?molid=36901
36904	877.729	[M+H]+	876.721	1	TG(17:0/17:2(9Z,12Z)/20:5(5Z,8Z,11Z,14Z,17Z))[iso6]	C57H96O6			NO	metabo_info.php?molid=36904
36905	877.729	[M+H]+	876.721	1	TG(17:1(9Z)/17:1(9Z)/20:5(5Z,8Z,11Z,14Z,17Z))[iso3]	C57H96O6			NO	metabo_info.php?molid=36905
36918	877.729	[M+H]+	876.721	1	TG(18:1(9Z)/18:3(9Z,12Z,15Z)/18:3(9Z,12Z,15Z))[iso3]	C57H96O6			NO	metabo_info.php?molid=36918
36919	877.729	[M+H]+	876.721	1	TG(18:2(9Z,12Z)/18:2(9Z,12Z)/18:3(9Z,12Z,15Z))[iso3]	C57H96O6			NO	metabo_info.php?molid=36919
36941	877.729	[M+H]+	876.721	1	TG(16:1(9Z)/18:3(9Z,12Z,15Z)/20:3(8Z,11Z,14Z))[iso6]	C57H96O6			NO	metabo_info.php?molid=36941
36945	877.729	[M+H]+	876.721	1	TG(16:0/18:3(9Z,12Z,15Z)/20:4(5Z,8Z,11Z,14Z))[iso6]	C57H96O6			NO	metabo_info.php?molid=36945
36946	877.729	[M+H]+	876.721	1	TG(16:1(9Z)/18:2(9Z,12Z)/20:4(5Z,8Z,11Z,14Z))[iso6]	C57H96O6			NO	metabo_info.php?molid=36946
36950	877.729	[M+H]+	876.721	1	TG(16:0/18:2(9Z,12Z)/20:5(5Z,8Z,11Z,14Z,17Z))[iso6]	C57H96O6			NO	metabo_info.php?molid=36950
36951	877.729	[M+H]+	876.721	1	TG(16:1(9Z)/18:1(9Z)/20:5(5Z,8Z,11Z,14Z,17Z))[iso6]	C57H96O6			NO	metabo_info.php?molid=36951
37084	877.729	[M+H]+	876.721	1	TG(16:1(9Z)/16:1(9Z)/22:5(7Z,10Z,13Z,16Z,19Z))[iso3]	C57H96O6			NO	metabo_info.php?molid=37084
37085	877.729	[M+H]+	876.721	1	TG(16:0/16:1(9Z)/22:6(4Z,7Z,10Z,13Z,16Z,19Z))[iso6]	C57H96O6			NO	metabo_info.php?molid=37085
61773	877.729	[M+H]+	876.721	1	TG(18:2(9Z,12Z)/16:0/20:5(5Z,8Z,11Z,14Z,17Z))[iso6]	C57H96O6			NO	metabo_info.php?molid=61773
61787	877.729	[M+H]+	876.721	1	TG(18:2(9Z,12Z)/18:2(9Z,12Z)/18:3(6Z,9Z,12Z))[iso3]	C57H96O6			NO	metabo_info.php?molid=61787
61793	877.729	[M+H]+	876.721	1	TG(18:3(9Z,12Z,15Z)/18:1(11Z)/18:3(9Z,12Z,15Z))[iso3]	C57H96O6			NO	metabo_info.php?molid=61793
61794	877.729	[M+H]+	876.721	1	TG(18:3(9Z,12Z,15Z)/18:1(9Z)/18:3(9Z,12Z,15Z))[iso3]	C57H96O6			NO	metabo_info.php?molid=61794
61806	877.729	[M+H]+	876.721	1	TG(20:4(5Z,8Z,11Z,14Z)/16:0/18:3(9Z,12Z,15Z))[iso6]	C57H96O6			NO	metabo_info.php?molid=61806
98719	877.729	[M+H]+	876.721	1	TG(14:1(9Z)/20:3(8Z,11Z,14Z)/20:3(8Z,11Z,14Z))[iso3]	C57H96O6			NO	metabo_info.php?molid=98719
98889	877.729	[M+H]+	876.721	1	TG(18:1(9Z)/18:3(6Z,9Z,12Z)/18:3(6Z,9Z,12Z))[iso3]	C57H96O6			NO	metabo_info.php?molid=98889
99460	877.729	[M+H]+	876.721	1	TG(12:0/20:1(11Z)/22:6(4Z,7Z,10Z,13Z,16Z,19Z))[iso6]	C57H96O6			NO	metabo_info.php?molid=99460
99470	877.729	[M+H]+	876.721	1	TG(12:0/20:2(11Z,14Z)/22:5(7Z,10Z,13Z,16Z,19Z))[iso6]	C57H96O6			NO	metabo_info.php?molid=99470
99479	877.729	[M+H]+	876.721	1	TG(12:0/20:3(8Z,11Z,14Z)/22:4(7Z,10Z,13Z,16Z))[iso6]	C57H96O6			NO	metabo_info.php?molid=99479
99487	877.729	[M+H]+	876.721	1	TG(12:0/20:4(5Z,8Z,11Z,14Z)/22:3(10Z,13Z,16Z))[iso6]	C57H96O6			NO	metabo_info.php?molid=99487
99494	877.729	[M+H]+	876.721	1	TG(12:0/20:5(5Z,8Z,11Z,14Z,17Z)/22:2(13Z,16Z))[iso6]	C57H96O6			NO	metabo_info.php?molid=99494
99900	877.729	[M+H]+	876.721	1	TG(13:0/19:1(9Z)/22:6(4Z,7Z,10Z,13Z,16Z,19Z))[iso6]	C57H96O6			NO	metabo_info.php?molid=99900
100236	877.729	[M+H]+	876.721	1	TG(14:0/18:1(9Z)/22:6(4Z,7Z,10Z,13Z,16Z,19Z))[iso6]	C57H96O6			NO	metabo_info.php?molid=100236
100254	877.729	[M+H]+	876.721	1	TG(14:0/18:2(9Z,12Z)/22:5(7Z,10Z,13Z,16Z,19Z))[iso6]	C57H96O6			NO	metabo_info.php?molid=100254
100271	877.729	[M+H]+	876.721	1	TG(14:0/18:3(6Z,9Z,12Z)/22:4(7Z,10Z,13Z,16Z))[iso6]	C57H96O6			NO	metabo_info.php?molid=100271
100288	877.729	[M+H]+	876.721	1	TG(14:0/18:3(9Z,12Z,15Z)/22:4(7Z,10Z,13Z,16Z))[iso6]	C57H96O6			NO	metabo_info.php?molid=100288
100303	877.729	[M+H]+	876.721	1	TG(14:0/18:4(6Z,9Z,12Z,15Z)/22:3(10Z,13Z,16Z))[iso6]	C57H96O6			NO	metabo_info.php?molid=100303
100363	877.729	[M+H]+	876.721	1	TG(14:0/20:2(11Z,14Z)/20:5(5Z,8Z,11Z,14Z,17Z))[iso6]	C57H96O6			NO	metabo_info.php?molid=100363
100372	877.729	[M+H]+	876.721	1	TG(14:0/20:3(8Z,11Z,14Z)/20:4(5Z,8Z,11Z,14Z))[iso6]	C57H96O6			NO	metabo_info.php?molid=100372
100622	877.729	[M+H]+	876.721	1	TG(14:1(9Z)/18:0/22:6(4Z,7Z,10Z,13Z,16Z,19Z))[iso6]	C57H96O6			NO	metabo_info.php?molid=100622
100641	877.729	[M+H]+	876.721	1	TG(14:1(9Z)/18:1(9Z)/22:5(7Z,10Z,13Z,16Z,19Z))[iso6]	C57H96O6			NO	metabo_info.php?molid=100641
100659	877.729	[M+H]+	876.721	1	TG(14:1(9Z)/18:2(9Z,12Z)/22:4(7Z,10Z,13Z,16Z))[iso6]	C57H96O6			NO	metabo_info.php?molid=100659
100676	877.729	[M+H]+	876.721	1	TG(14:1(9Z)/18:3(6Z,9Z,12Z)/22:3(10Z,13Z,16Z))[iso6]	C57H96O6			NO	metabo_info.php?molid=100676
100693	877.729	[M+H]+	876.721	1	TG(14:1(9Z)/18:3(9Z,12Z,15Z)/22:3(10Z,13Z,16Z))[iso6]	C57H96O6			NO	metabo_info.php?molid=100693
100708	877.729	[M+H]+	876.721	1	TG(14:1(9Z)/18:4(6Z,9Z,12Z,15Z)/22:2(13Z,16Z))[iso6]	C57H96O6			NO	metabo_info.php?molid=100708
100758	877.729	[M+H]+	876.721	1	TG(14:1(9Z)/20:1(11Z)/20:5(5Z,8Z,11Z,14Z,17Z))[iso6]	C57H96O6			NO	metabo_info.php?molid=100758
100768	877.729	[M+H]+	876.721	1	TG(14:1(9Z)/20:2(11Z,14Z)/20:4(5Z,8Z,11Z,14Z))[iso6]	C57H96O6			NO	metabo_info.php?molid=100768
100954	877.729	[M+H]+	876.721	1	TG(15:0/17:1(9Z)/22:6(4Z,7Z,10Z,13Z,16Z,19Z))[iso6]	C57H96O6			NO	metabo_info.php?molid=100954
100975	877.729	[M+H]+	876.721	1	TG(15:0/17:2(9Z,12Z)/22:5(7Z,10Z,13Z,16Z,19Z))[iso6]	C57H96O6			NO	metabo_info.php?molid=100975
101278	877.729	[M+H]+	876.721	1	TG(15:1(9Z)/17:0/22:6(4Z,7Z,10Z,13Z,16Z,19Z))[iso6]	C57H96O6			NO	metabo_info.php?molid=101278
101300	877.729	[M+H]+	876.721	1	TG(15:1(9Z)/17:1(9Z)/22:5(7Z,10Z,13Z,16Z,19Z))[iso6]	C57H96O6			NO	metabo_info.php?molid=101300
101321	877.729	[M+H]+	876.721	1	TG(15:1(9Z)/17:2(9Z,12Z)/22:4(7Z,10Z,13Z,16Z))[iso6]	C57H96O6			NO	metabo_info.php?molid=101321
101455	877.729	[M+H]+	876.721	1	TG(15:1(9Z)/19:1(9Z)/20:5(5Z,8Z,11Z,14Z,17Z))[iso6]	C57H96O6			NO	metabo_info.php?molid=101455
101591	877.729	[M+H]+	876.721	1	TG(16:0/18:3(6Z,9Z,12Z)/20:4(5Z,8Z,11Z,14Z))[iso6]	C57H96O6			NO	metabo_info.php?molid=101591
101609	877.729	[M+H]+	876.721	1	TG(16:0/18:4(6Z,9Z,12Z,15Z)/20:3(8Z,11Z,14Z))[iso6]	C57H96O6			NO	metabo_info.php?molid=101609
101681	877.729	[M+H]+	876.721	1	TG(16:1(9Z)/18:3(6Z,9Z,12Z)/20:3(8Z,11Z,14Z))[iso6]	C57H96O6			NO	metabo_info.php?molid=101681
101699	877.729	[M+H]+	876.721	1	TG(16:1(9Z)/18:4(6Z,9Z,12Z,15Z)/20:2(11Z,14Z))[iso6]	C57H96O6			NO	metabo_info.php?molid=101699
101945	877.729	[M+H]+	876.721	1	TG(17:2(9Z,12Z)/18:4(6Z,9Z,12Z,15Z)/19:1(9Z))[iso6]	C57H96O6			NO	metabo_info.php?molid=101945
101999	877.729	[M+H]+	876.721	1	TG(18:0/18:3(6Z,9Z,12Z)/18:4(6Z,9Z,12Z,15Z))[iso6]	C57H96O6			NO	metabo_info.php?molid=101999
102016	877.729	[M+H]+	876.721	1	TG(18:0/18:3(9Z,12Z,15Z)/18:4(6Z,9Z,12Z,15Z))[iso6]	C57H96O6			NO	metabo_info.php?molid=102016
102066	877.729	[M+H]+	876.721	1	TG(18:1(9Z)/18:2(9Z,12Z)/18:4(6Z,9Z,12Z,15Z))[iso6]	C57H96O6			NO	metabo_info.php?molid=102066
102069	877.729	[M+H]+	876.721	1	TG(18:1(9Z)/18:3(6Z,9Z,12Z)/18:3(9Z,12Z,15Z))[iso6]	C57H96O6			NO	metabo_info.php?molid=102069
36806	877.729	[M+Na]+	854.736	4	TG(17:2(9Z,12Z)/17:2(9Z,12Z)/18:0)[iso3]	C55H98O6			NO	metabo_info.php?molid=36806
4818	877.729	[M+Na]+	854.736	4	TG(17:1(9Z)/17:2(9Z,12Z)/18:1(9Z))[iso6]	C55H98O6			NO	metabo_info.php?molid=4818
4820	877.729	[M+Na]+	854.736	4	TG(17:0/17:2(9Z,12Z)/18:2(9Z,12Z))[iso6]	C55H98O6			NO	metabo_info.php?molid=4820
4821	877.729	[M+Na]+	854.736	4	TG(17:1(9Z)/17:1(9Z)/18:2(9Z,12Z))[iso3]	C55H98O6			NO	metabo_info.php?molid=4821
4824	877.729	[M+Na]+	854.736	4	TG(17:0/17:1(9Z)/18:3(9Z,12Z,15Z))[iso6]	C55H98O6			NO	metabo_info.php?molid=4824
4838	877.729	[M+Na]+	854.736	4	TG(16:0/18:2(9Z,12Z)/18:2(9Z,12Z))[iso3]	C55H98O6			NO	metabo_info.php?molid=4838
4839	877.729	[M+Na]+	854.736	4	TG(16:1(9Z)/18:1(9Z)/18:2(9Z,12Z))[iso6]	C55H98O6			NO	metabo_info.php?molid=4839
4842	877.729	[M+Na]+	854.736	4	TG(16:0/18:1(9Z)/18:3(9Z,12Z,15Z))[iso6]	C55H98O6			NO	metabo_info.php?molid=4842
4843	877.729	[M+Na]+	854.736	4	TG(16:1(9Z)/18:0/18:3(9Z,12Z,15Z))[iso6]	C55H98O6			NO	metabo_info.php?molid=4843
4854	877.729	[M+Na]+	854.736	4	TG(16:1(9Z)/16:1(9Z)/20:2(11Z,14Z))[iso3]	C55H98O6			NO	metabo_info.php?molid=4854
4855	877.729	[M+Na]+	854.736	4	TG(16:0/16:1(9Z)/20:3(8Z,11Z,14Z))[iso6]	C55H98O6			NO	metabo_info.php?molid=4855
4856	877.729	[M+Na]+	854.736	4	TG(16:0/16:0/20:4(5Z,8Z,11Z,14Z))[iso3]	C55H98O6			NO	metabo_info.php?molid=4856
61746	877.729	[M+Na]+	854.736	4	TG(18:1(11Z)/16:0/18:3(9Z,12Z,15Z))[iso6]	C55H98O6			NO	metabo_info.php?molid=61746
61750	877.729	[M+Na]+	854.736	4	TG(18:1(11Z)/16:1(9Z)/18:2(9Z,12Z))[iso6]	C55H98O6			NO	metabo_info.php?molid=61750
61757	877.729	[M+Na]+	854.736	4	TG(18:1(9Z)/16:0/18:3(9Z,12Z,15Z))[iso6]	C55H98O6			NO	metabo_info.php?molid=61757
87420	877.729	[M+Na]+	854.736	4	Glycerol 1,2-di-(9Z,12Z-octadecadienoate) 3-hexadecanoate	C55H98O6	26836-36-2		NO	metabo_info.php?molid=87420
87421	877.729	[M+Na]+	854.736	4	Glycerol 1,3-di-(9Z,12Z-octadecadienoate) 2-hexadecanoate	C55H98O6	2190-16-1		NO	metabo_info.php?molid=87421
98538	877.729	[M+Na]+	854.736	4	TG(12:0/20:2(11Z,14Z)/20:2(11Z,14Z))[iso3]	C55H98O6			NO	metabo_info.php?molid=98538
98755	877.729	[M+Na]+	854.736	4	TG(15:0/15:0/22:4(7Z,10Z,13Z,16Z))[iso3]	C55H98O6			NO	metabo_info.php?molid=98755
98806	877.729	[M+Na]+	854.736	4	TG(15:1(9Z)/15:1(9Z)/22:2(13Z,16Z))[iso3]	C55H98O6			NO	metabo_info.php?molid=98806
98855	877.729	[M+Na]+	854.736	4	TG(17:0/17:0/18:4(6Z,9Z,12Z,15Z))[iso3]	C55H98O6			NO	metabo_info.php?molid=98855
99314	877.729	[M+Na]+	854.736	4	TG(12:0/18:0/22:4(7Z,10Z,13Z,16Z))[iso6]	C55H98O6			NO	metabo_info.php?molid=99314
99333	877.729	[M+Na]+	854.736	4	TG(12:0/18:1(9Z)/22:3(10Z,13Z,16Z))[iso6]	C55H98O6			NO	metabo_info.php?molid=99333
99351	877.729	[M+Na]+	854.736	4	TG(12:0/18:2(9Z,12Z)/22:2(13Z,16Z))[iso6]	C55H98O6			NO	metabo_info.php?molid=99351
99368	877.729	[M+Na]+	854.736	4	TG(12:0/18:3(6Z,9Z,12Z)/22:1(11Z))[iso6]	C55H98O6			NO	metabo_info.php?molid=99368
99385	877.729	[M+Na]+	854.736	4	TG(12:0/18:3(9Z,12Z,15Z)/22:1(11Z))[iso6]	C55H98O6			NO	metabo_info.php?molid=99385
99400	877.729	[M+Na]+	854.736	4	TG(12:0/18:4(6Z,9Z,12Z,15Z)/22:0)[iso6]	C55H98O6			NO	metabo_info.php?molid=99400
99439	877.729	[M+Na]+	854.736	4	TG(12:0/20:0/20:4(5Z,8Z,11Z,14Z))[iso6]	C55H98O6			NO	metabo_info.php?molid=99439
99450	877.729	[M+Na]+	854.736	4	TG(12:0/20:1(11Z)/20:3(8Z,11Z,14Z))[iso6]	C55H98O6			NO	metabo_info.php?molid=99450
99713	877.729	[M+Na]+	854.736	4	TG(13:0/17:0/22:4(7Z,10Z,13Z,16Z))[iso6]	C55H98O6			NO	metabo_info.php?molid=99713
99735	877.729	[M+Na]+	854.736	4	TG(13:0/17:1(9Z)/22:3(10Z,13Z,16Z))[iso6]	C55H98O6			NO	metabo_info.php?molid=99735
99756	877.729	[M+Na]+	854.736	4	TG(13:0/17:2(9Z,12Z)/22:2(13Z,16Z))[iso6]	C55H98O6			NO	metabo_info.php?molid=99756
99864	877.729	[M+Na]+	854.736	4	TG(13:0/18:4(6Z,9Z,12Z,15Z)/21:0)[iso6]	C55H98O6			NO	metabo_info.php?molid=99864
99877	877.729	[M+Na]+	854.736	4	TG(13:0/19:0/20:4(5Z,8Z,11Z,14Z))[iso6]	C55H98O6			NO	metabo_info.php?molid=99877
99890	877.729	[M+Na]+	854.736	4	TG(13:0/19:1(9Z)/20:3(8Z,11Z,14Z))[iso6]	C55H98O6			NO	metabo_info.php?molid=99890
100099	877.729	[M+Na]+	854.736	4	TG(14:0/16:0/22:4(7Z,10Z,13Z,16Z))[iso6]	C55H98O6			NO	metabo_info.php?molid=100099
100123	877.729	[M+Na]+	854.736	4	TG(14:0/16:1(9Z)/22:3(10Z,13Z,16Z))[iso6]	C55H98O6			NO	metabo_info.php?molid=100123
100207	877.729	[M+Na]+	854.736	4	TG(14:0/18:0/20:4(5Z,8Z,11Z,14Z))[iso6]	C55H98O6			NO	metabo_info.php?molid=100207
100226	877.729	[M+Na]+	854.736	4	TG(14:0/18:1(9Z)/20:3(8Z,11Z,14Z))[iso6]	C55H98O6			NO	metabo_info.php?molid=100226
100244	877.729	[M+Na]+	854.736	4	TG(14:0/18:2(9Z,12Z)/20:2(11Z,14Z))[iso6]	C55H98O6			NO	metabo_info.php?molid=100244
100261	877.729	[M+Na]+	854.736	4	TG(14:0/18:3(6Z,9Z,12Z)/20:1(11Z))[iso6]	C55H98O6			NO	metabo_info.php?molid=100261
100278	877.729	[M+Na]+	854.736	4	TG(14:0/18:3(9Z,12Z,15Z)/20:1(11Z))[iso6]	C55H98O6			NO	metabo_info.php?molid=100278
100293	877.729	[M+Na]+	854.736	4	TG(14:0/18:4(6Z,9Z,12Z,15Z)/20:0)[iso6]	C55H98O6			NO	metabo_info.php?molid=100293
100504	877.729	[M+Na]+	854.736	4	TG(14:1(9Z)/16:0/22:3(10Z,13Z,16Z))[iso6]	C55H98O6			NO	metabo_info.php?molid=100504
100528	877.729	[M+Na]+	854.736	4	TG(14:1(9Z)/16:1(9Z)/22:2(13Z,16Z))[iso6]	C55H98O6			NO	metabo_info.php?molid=100528
100612	877.729	[M+Na]+	854.736	4	TG(14:1(9Z)/18:0/20:3(8Z,11Z,14Z))[iso6]	C55H98O6			NO	metabo_info.php?molid=100612
100631	877.729	[M+Na]+	854.736	4	TG(14:1(9Z)/18:1(9Z)/20:2(11Z,14Z))[iso6]	C55H98O6			NO	metabo_info.php?molid=100631
100649	877.729	[M+Na]+	854.736	4	TG(14:1(9Z)/18:2(9Z,12Z)/20:1(11Z))[iso6]	C55H98O6			NO	metabo_info.php?molid=100649
100666	877.729	[M+Na]+	854.736	4	TG(14:1(9Z)/18:3(6Z,9Z,12Z)/20:0)[iso6]	C55H98O6			NO	metabo_info.php?molid=100666
100683	877.729	[M+Na]+	854.736	4	TG(14:1(9Z)/18:3(9Z,12Z,15Z)/20:0)[iso6]	C55H98O6			NO	metabo_info.php?molid=100683
100856	877.729	[M+Na]+	854.736	4	TG(15:0/15:1(9Z)/22:3(10Z,13Z,16Z))[iso6]	C55H98O6			NO	metabo_info.php?molid=100856
100922	877.729	[M+Na]+	854.736	4	TG(15:0/17:0/20:4(5Z,8Z,11Z,14Z))[iso6]	C55H98O6			NO	metabo_info.php?molid=100922
100944	877.729	[M+Na]+	854.736	4	TG(15:0/17:1(9Z)/20:3(8Z,11Z,14Z))[iso6]	C55H98O6			NO	metabo_info.php?molid=100944
100965	877.729	[M+Na]+	854.736	4	TG(15:0/17:2(9Z,12Z)/20:2(11Z,14Z))[iso6]	C55H98O6			NO	metabo_info.php?molid=100965
101036	877.729	[M+Na]+	854.736	4	TG(15:0/18:3(6Z,9Z,12Z)/19:1(9Z))[iso6]	C55H98O6			NO	metabo_info.php?molid=101036
101053	877.729	[M+Na]+	854.736	4	TG(15:0/18:3(9Z,12Z,15Z)/19:1(9Z))[iso6]	C55H98O6			NO	metabo_info.php?molid=101053
101068	877.729	[M+Na]+	854.736	4	TG(15:0/18:4(6Z,9Z,12Z,15Z)/19:0)[iso6]	C55H98O6			NO	metabo_info.php?molid=101068
101268	877.729	[M+Na]+	854.736	4	TG(15:1(9Z)/17:0/20:3(8Z,11Z,14Z))[iso6]	C55H98O6			NO	metabo_info.php?molid=101268
101290	877.729	[M+Na]+	854.736	4	TG(15:1(9Z)/17:1(9Z)/20:2(11Z,14Z))[iso6]	C55H98O6			NO	metabo_info.php?molid=101290
101311	877.729	[M+Na]+	854.736	4	TG(15:1(9Z)/17:2(9Z,12Z)/20:1(11Z))[iso6]	C55H98O6			NO	metabo_info.php?molid=101311
101369	877.729	[M+Na]+	854.736	4	TG(15:1(9Z)/18:2(9Z,12Z)/19:1(9Z))[iso6]	C55H98O6			NO	metabo_info.php?molid=101369
101386	877.729	[M+Na]+	854.736	4	TG(15:1(9Z)/18:3(6Z,9Z,12Z)/19:0)[iso6]	C55H98O6			NO	metabo_info.php?molid=101386
101403	877.729	[M+Na]+	854.736	4	TG(15:1(9Z)/18:3(9Z,12Z,15Z)/19:0)[iso6]	C55H98O6			NO	metabo_info.php?molid=101403
101572	877.729	[M+Na]+	854.736	4	TG(16:0/18:0/18:4(6Z,9Z,12Z,15Z))[iso6]	C55H98O6			NO	metabo_info.php?molid=101572
101575	877.729	[M+Na]+	854.736	4	TG(16:0/18:1(9Z)/18:3(6Z,9Z,12Z))[iso6]	C55H98O6			NO	metabo_info.php?molid=101575
101660	877.729	[M+Na]+	854.736	4	TG(16:1(9Z)/17:2(9Z,12Z)/19:1(9Z))[iso6]	C55H98O6			NO	metabo_info.php?molid=101660
101662	877.729	[M+Na]+	854.736	4	TG(16:1(9Z)/18:0/18:3(6Z,9Z,12Z))[iso6]	C55H98O6			NO	metabo_info.php?molid=101662
101741	877.729	[M+Na]+	854.736	4	TG(17:0/17:1(9Z)/18:3(6Z,9Z,12Z))[iso6]	C55H98O6			NO	metabo_info.php?molid=101741
85154	1011.28	[M+K]+	972.317	4	Alpha-cyclodextrin	C36H60O30	10016-20-3		YES	metabo_info.php?molid=85154
86502	575.504	[M+H]+	574.496	0	Montecristin	C37H66O4	185336-15-6		NO	metabo_info.php?molid=86502
39373	780.552	[M+H]+	779.547	2	PC(16:0/20:5(5E,8E,11E,14E,17E))[U]	C44H78NO8P			NO	metabo_info.php?molid=39373
39375	780.552	[M+H]+	779.547	2	PC(16:0/20:5(5Z,8Z,11Z,14Z,17Z))[U]	C44H78NO8P			NO	metabo_info.php?molid=39375
39435	780.552	[M+H]+	779.547	2	PC(16:1(9Z)/20:4(5Z,8Z,11Z,14Z))[U]	C44H78NO8P			NO	metabo_info.php?molid=39435
39699	780.552	[M+H]+	779.547	2	PC(18:4(2E,4E,6E,11Z)/18:1(11Z))[U]	C44H78NO8P			NO	metabo_info.php?molid=39699
40029	780.552	[M+H]+	779.547	2	PC(16:1(7Z)/20:4(5Z,8Z,11Z,14Z))	C44H78NO8P			NO	metabo_info.php?molid=40029
59340	780.552	[M+H]+	779.547	2	PC(14:0/22:5(4Z,7Z,10Z,13Z,16Z))	C44H78NO8P		C00157	NO	metabo_info.php?molid=59340
59341	780.552	[M+H]+	779.547	2	PC(14:0/22:5(7Z,10Z,13Z,16Z,19Z))	C44H78NO8P		C00157	NO	metabo_info.php?molid=59341
59372	780.552	[M+H]+	779.547	2	PC(14:1(9Z)/22:4(7Z,10Z,13Z,16Z))	C44H78NO8P		C00157	NO	metabo_info.php?molid=59372
59432	780.552	[M+H]+	779.547	2	PC(16:0/20:5(5Z,8Z,11Z,14Z,17Z))	C44H78NO8P		C00157	NO	metabo_info.php?molid=59432
59463	780.552	[M+H]+	779.547	2	PC(16:1(9Z)/20:4(5Z,8Z,11Z,14Z))	C44H78NO8P		C00157	NO	metabo_info.php?molid=59463
59464	780.552	[M+H]+	779.547	2	PC(16:1(9Z)/20:4(8Z,11Z,14Z,17Z))	C44H78NO8P		C00157	NO	metabo_info.php?molid=59464
59522	780.552	[M+H]+	779.547	2	PC(18:1(11Z)/18:4(6Z,9Z,12Z,15Z))	C44H78NO8P		C00157	NO	metabo_info.php?molid=59522
59554	780.552	[M+H]+	779.547	2	PC(18:1(9Z)/18:4(6Z,9Z,12Z,15Z))	C44H78NO8P		C00157	NO	metabo_info.php?molid=59554
59586	780.552	[M+H]+	779.547	2	PC(18:2(9Z,12Z)/18:3(6Z,9Z,12Z))	C44H78NO8P		C00157	NO	metabo_info.php?molid=59586
59587	780.552	[M+H]+	779.547	2	PC(18:2(9Z,12Z)/18:3(9Z,12Z,15Z))	C44H78NO8P		C00157	NO	metabo_info.php?molid=59587
59617	780.552	[M+H]+	779.547	2	PC(18:3(6Z,9Z,12Z)/18:2(9Z,12Z))	C44H78NO8P		C00157	NO	metabo_info.php?molid=59617
59650	780.552	[M+H]+	779.547	2	PC(18:3(9Z,12Z,15Z)/18:2(9Z,12Z))	C44H78NO8P		C00157	NO	metabo_info.php?molid=59650
59681	780.552	[M+H]+	779.547	2	PC(18:4(6Z,9Z,12Z,15Z)/18:1(11Z))	C44H78NO8P		C00157	NO	metabo_info.php?molid=59681
59682	780.552	[M+H]+	779.547	2	PC(18:4(6Z,9Z,12Z,15Z)/18:1(9Z))	C44H78NO8P		C00157	NO	metabo_info.php?molid=59682
59876	780.552	[M+H]+	779.547	2	PC(20:4(5Z,8Z,11Z,14Z)/16:1(9Z))	C44H78NO8P		C00157	NO	metabo_info.php?molid=59876
59909	780.552	[M+H]+	779.547	2	PC(20:4(8Z,11Z,14Z,17Z)/16:1(9Z))	C44H78NO8P		C00157	NO	metabo_info.php?molid=59909
59941	780.552	[M+H]+	779.547	2	PC(20:5(5Z,8Z,11Z,14Z,17Z)/16:0)	C44H78NO8P		C00157	NO	metabo_info.php?molid=59941
60070	780.552	[M+H]+	779.547	2	PC(22:4(7Z,10Z,13Z,16Z)/14:1(9Z))	C44H78NO8P		C00157	NO	metabo_info.php?molid=60070
60102	780.552	[M+H]+	779.547	2	PC(22:5(4Z,7Z,10Z,13Z,16Z)/14:0)	C44H78NO8P		C00157	NO	metabo_info.php?molid=60102
60135	780.552	[M+H]+	779.547	2	PC(22:5(7Z,10Z,13Z,16Z,19Z)/14:0)	C44H78NO8P		C00157	NO	metabo_info.php?molid=60135
76824	780.552	[M+H]+	779.547	2	PE(17:1(9Z)/22:4(7Z,10Z,13Z,16Z))	C44H78NO8P			NO	metabo_info.php?molid=76824
77021	780.552	[M+H]+	779.547	2	PE(19:0/20:5(5Z,8Z,11Z,14Z,17Z))	C44H78NO8P			NO	metabo_info.php?molid=77021
77051	780.552	[M+H]+	779.547	2	PE(19:1(9Z)/20:4(5Z,8Z,11Z,14Z))	C44H78NO8P			NO	metabo_info.php?molid=77051
77185	780.552	[M+H]+	779.547	2	PE(20:4(5Z,8Z,11Z,14Z)/19:1(9Z))	C44H78NO8P			NO	metabo_info.php?molid=77185
77213	780.552	[M+H]+	779.547	2	PE(20:5(5Z,8Z,11Z,14Z,17Z)/19:0)	C44H78NO8P			NO	metabo_info.php?molid=77213
77346	780.552	[M+H]+	779.547	2	PE(22:4(7Z,10Z,13Z,16Z)/17:1(9Z))	C44H78NO8P			NO	metabo_info.php?molid=77346
40727	780.552	[M+Na]+	757.562	1	PE-NMe(18:1(9E)/18:1(9E))	C42H80NO8P			NO	metabo_info.php?molid=40727
40729	780.552	[M+Na]+	757.562	1	PE-NMe(18:1(9Z)/18:1(9Z))[U]	C42H80NO8P			NO	metabo_info.php?molid=40729
40734	780.552	[M+Na]+	757.562	1	PE-NMe(18:1(9Z)/18:1(9Z))	C42H80NO8P			NO	metabo_info.php?molid=40734
40746	780.552	[M+Na]+	757.562	1	PE-NMe(18:1(9E)/18:1(9E))[U]	C42H80NO8P			NO	metabo_info.php?molid=40746
39327	780.552	[M+Na]+	757.562	1	PC(16:0/18:2(10E,12Z))	C42H80NO8P			NO	metabo_info.php?molid=39327
39328	780.552	[M+Na]+	757.562	1	PC(16:0/18:2(11Z,13Z))	C42H80NO8P			NO	metabo_info.php?molid=39328
39329	780.552	[M+Na]+	757.562	1	PC(16:0/18:2(2E,4E))	C42H80NO8P			NO	metabo_info.php?molid=39329
39330	780.552	[M+Na]+	757.562	1	PC(16:0/18:2(2Z,4Z))	C42H80NO8P			NO	metabo_info.php?molid=39330
39331	780.552	[M+Na]+	757.562	1	PC(16:0/18:2(6Z,9Z))	C42H80NO8P			NO	metabo_info.php?molid=39331
39332	780.552	[M+Na]+	757.562	1	PC(16:0/18:2(9E,11E))	C42H80NO8P			NO	metabo_info.php?molid=39332
39333	780.552	[M+Na]+	757.562	1	PC(16:0/18:2(9E,11Z))	C42H80NO8P			NO	metabo_info.php?molid=39333
39334	780.552	[M+Na]+	757.562	1	PC(16:0/18:2(9E,12E))	C42H80NO8P			NO	metabo_info.php?molid=39334
39335	780.552	[M+Na]+	757.562	1	PC(16:0/18:2(9E,12E))[U]	C42H80NO8P			NO	metabo_info.php?molid=39335
39337	780.552	[M+Na]+	757.562	1	PC(16:0/18:2(9Z,12Z))[S]	C42H80NO8P			NO	metabo_info.php?molid=39337
39338	780.552	[M+Na]+	757.562	1	PC(16:0/18:2(9Z,12Z))[U]	C42H80NO8P			NO	metabo_info.php?molid=39338
39419	780.552	[M+Na]+	757.562	1	PC(16:1(2Z)/18:1(9Z))	C42H80NO8P			NO	metabo_info.php?molid=39419
39421	780.552	[M+Na]+	757.562	1	PC(16:1(7Z)/18:1(9Z))[U]	C42H80NO8P			NO	metabo_info.php?molid=39421
39430	780.552	[M+Na]+	757.562	1	PC(16:1(9Z)/18:1(9Z))[U]	C42H80NO8P			NO	metabo_info.php?molid=39430
39467	780.552	[M+Na]+	757.562	1	PC(17:1(10E)/17:1(10E))[U]	C42H80NO8P			NO	metabo_info.php?molid=39467
39468	780.552	[M+Na]+	757.562	1	PC(17:1(10Z)/17:1(10Z))	C42H80NO8P			NO	metabo_info.php?molid=39468
39469	780.552	[M+Na]+	757.562	1	PC(17:1(9Z)/17:1(9Z))	C42H80NO8P			NO	metabo_info.php?molid=39469
39486	780.552	[M+Na]+	757.562	1	PC(18:0/16:2(2E,4E))	C42H80NO8P			NO	metabo_info.php?molid=39486
39627	780.552	[M+Na]+	757.562	1	PC(18:1(9Z)/16:1(3E))[U]	C42H80NO8P			NO	metabo_info.php?molid=39627
39661	780.552	[M+Na]+	757.562	1	PC(18:2(2E,4E)/16:0)	C42H80NO8P			NO	metabo_info.php?molid=39661
39667	780.552	[M+Na]+	757.562	1	PC(18:2(6Z,9Z)/16:0)	C42H80NO8P			NO	metabo_info.php?molid=39667
39674	780.552	[M+Na]+	757.562	1	PC(18:2(9Z,12Z)/16:0)[U]	C42H80NO8P			NO	metabo_info.php?molid=39674
59330	780.552	[M+Na]+	757.562	1	PC(14:0/20:2(11Z,14Z))	C42H80NO8P		C00157	NO	metabo_info.php?molid=59330
59362	780.552	[M+Na]+	757.562	1	PC(14:1(9Z)/20:1(11Z))	C42H80NO8P		C00157	NO	metabo_info.php?molid=59362
59422	780.552	[M+Na]+	757.562	1	PC(16:0/18:2(9Z,12Z))	C42H80NO8P		C00157	NO	metabo_info.php?molid=59422
59452	780.552	[M+Na]+	757.562	1	PC(16:1(9Z)/18:1(11Z))	C42H80NO8P		C00157	NO	metabo_info.php?molid=59452
59453	780.552	[M+Na]+	757.562	1	PC(16:1(9Z)/18:1(9Z))	C42H80NO8P		C00157	NO	metabo_info.php?molid=59453
59515	780.552	[M+Na]+	757.562	1	PC(18:1(11Z)/16:1(9Z))	C42H80NO8P		C00157	NO	metabo_info.php?molid=59515
59548	780.552	[M+Na]+	757.562	1	PC(18:1(9Z)/16:1(9Z))	C42H80NO8P		C00157	NO	metabo_info.php?molid=59548
59579	780.552	[M+Na]+	757.562	1	PC(18:2(9Z,12Z)/16:0)	C42H80NO8P		C00157	NO	metabo_info.php?molid=59579
59742	780.552	[M+Na]+	757.562	1	PC(20:1(11Z)/14:1(9Z))	C42H80NO8P		C00157	NO	metabo_info.php?molid=59742
59774	780.552	[M+Na]+	757.562	1	PC(20:2(11Z,14Z)/14:0)	C42H80NO8P		C00157	NO	metabo_info.php?molid=59774
60352	780.552	[M+Na]+	757.562	1	PE(15:0/22:2(13Z,16Z))	C42H80NO8P		C00350	NO	metabo_info.php?molid=60352
60938	780.552	[M+Na]+	757.562	1	PE(22:2(13Z,16Z)/15:0)	C42H80NO8P		C00350	NO	metabo_info.php?molid=60938
75616	780.552	[M+Na]+	757.562	1	PC(12:0/22:2(13Z,16Z))	C42H80NO8P			NO	metabo_info.php?molid=75616
75729	780.552	[M+Na]+	757.562	1	PC(15:1(9Z)/19:1(9Z))	C42H80NO8P			NO	metabo_info.php?molid=75729
75784	780.552	[M+Na]+	757.562	1	PC(17:0/17:2(9Z,12Z))	C42H80NO8P			NO	metabo_info.php?molid=75784
75839	780.552	[M+Na]+	757.562	1	PC(17:2(9Z,12Z)/17:0)	C42H80NO8P			NO	metabo_info.php?molid=75839
76041	780.552	[M+Na]+	757.562	1	PC(19:1(9Z)/15:1(9Z))	C42H80NO8P			NO	metabo_info.php?molid=76041
76315	780.552	[M+Na]+	757.562	1	PC(22:2(13Z,16Z)/12:0)	C42H80NO8P			NO	metabo_info.php?molid=76315
76736	780.552	[M+Na]+	757.562	1	PE(15:1(9Z)/22:1(11Z))	C42H80NO8P			NO	metabo_info.php?molid=76736
76788	780.552	[M+Na]+	757.562	1	PE(17:0/20:2(11Z,14Z))	C42H80NO8P			NO	metabo_info.php?molid=76788
76815	780.552	[M+Na]+	757.562	1	PE(17:1(9Z)/20:1(11Z))	C42H80NO8P			NO	metabo_info.php?molid=76815
76844	780.552	[M+Na]+	757.562	1	PE(17:2(9Z,12Z)/20:0)	C42H80NO8P			NO	metabo_info.php?molid=76844
76881	780.552	[M+Na]+	757.562	1	PE(18:1(9Z)/19:1(9Z))	C42H80NO8P			NO	metabo_info.php?molid=76881
76902	780.552	[M+Na]+	757.562	1	PE(18:2(9Z,12Z)/19:0)	C42H80NO8P			NO	metabo_info.php?molid=76902
77011	780.552	[M+Na]+	757.562	1	PE(19:0/18:2(9Z,12Z))	C42H80NO8P			NO	metabo_info.php?molid=77011
77040	780.552	[M+Na]+	757.562	1	PE(19:1(9Z)/18:1(9Z))	C42H80NO8P			NO	metabo_info.php?molid=77040
77065	780.552	[M+Na]+	757.562	1	PE(20:0/17:2(9Z,12Z))	C42H80NO8P			NO	metabo_info.php?molid=77065
77085	780.552	[M+Na]+	757.562	1	PE(20:1(11Z)/17:1(9Z))	C42H80NO8P			NO	metabo_info.php?molid=77085
77114	780.552	[M+Na]+	757.562	1	PE(20:2(11Z,14Z)/17:0)	C42H80NO8P			NO	metabo_info.php?molid=77114
77280	780.552	[M+Na]+	757.562	1	PE(22:1(11Z)/15:1(9Z))	C42H80NO8P			NO	metabo_info.php?molid=77280
47296	699.145	[M+K]+	660.184	2	Isophylloflavanine	C35H32O13			NO	metabo_info.php?molid=47296
47297	699.145	[M+K]+	660.184	2	Phylloflavanine	C35H32O13			NO	metabo_info.php?molid=47297
86502	597.486	[M+Na]+	574.496	1	Montecristin	C37H66O4	185336-15-6		NO	metabo_info.php?molid=86502
62889	1013.32	[M+Na]+	990.328	0	Maltohexaose	C36H62O31	34620-77-4	C01936	YES	metabo_info.php?molid=62889
63208	1013.32	[M+Na]+	990.328	0	Cellohexaose	C36H62O31		C06217	NO	metabo_info.php?molid=63208
66857	1013.32	[M+Na]+	990.328	0	alpha-Galactosyl-(1-6)-alpha-galactosyl-(1-6)-alpha-galactosyl-(1-6)-alpha-galactosyl-(1-6)-alpha-glucosyl-(1-2)-beta-fructose	C36H62O31	512-72-1	C08238	NO	metabo_info.php?molid=66857
94808	1013.32	[M+K]+	974.363	8	(8R,8&#39
71669	331.081	[M+H]+	330.071	9	Penicillin O	C13H18N2O4S2	87-09-2	C17405	NO	metabo_info.php?molid=71669
3462	331.081	[M+H]+	330.074	0	Malvidin	C17H14O7	643-84-5	C08716	YES	metabo_info.php?molid=3462
47183	331.081	[M+H]+	330.074	0	Europinidin	C17H14O7			NO	metabo_info.php?molid=47183
47295	331.081	[M+H]+	330.074	0	Dryopterin	C17H14O7			NO	metabo_info.php?molid=47295
47841	331.081	[M+H]+	330.074	0	2\'-Hydroxy-5\'-methoxybiochanin A	C17H14O7			NO	metabo_info.php?molid=47841
47867	331.081	[M+H]+	330.074	0	Podospicatin	C17H14O7			NO	metabo_info.php?molid=47867
47906	331.081	[M+H]+	330.074	0	Iristectorigenin A	C17H14O7			NO	metabo_info.php?molid=47906
47907	331.081	[M+H]+	330.074	0	Iristectorigenin B	C17H14O7			NO	metabo_info.php?molid=47907
47915	331.081	[M+H]+	330.074	0	6-Methoxyorobol 7-methyl ether	C17H14O7			NO	metabo_info.php?molid=47915
47938	331.081	[M+H]+	330.074	0	5,7,3\'-Trihydroxy-8,4\'-dimethoxyisoflavone	C17H14O7			NO	metabo_info.php?molid=47938
48067	331.081	[M+H]+	330.074	0	(-)-4,11,12a-Trihydroxy-9-methoxyrotenone	C17H14O7			NO	metabo_info.php?molid=48067
48194	331.081	[M+H]+	330.074	0	Trifolian	C17H14O7			NO	metabo_info.php?molid=48194
48217	331.081	[M+H]+	330.074	0	Hildecarpin	C17H14O7		C10424	NO	metabo_info.php?molid=48217
48224	331.081	[M+H]+	330.074	0	Tephrocarpin	C17H14O7			NO	metabo_info.php?molid=48224
48415	331.081	[M+H]+	330.074	0	8,3\',4\'-Trihydroxy-5,7-dimethoxy-4-phenylcoumarin	C17H14O7			NO	metabo_info.php?molid=48415
48508	331.081	[M+H]+	330.074	0	6,7,4\'-Trihydroxy-3\',5\'-dimethoxyflavone	C17H14O7			NO	metabo_info.php?molid=48508
48530	331.081	[M+H]+	330.074	0	5,4\',5\'-Trihydroxy-6,2\'-dimethoxyflavone	C17H14O7			NO	metabo_info.php?molid=48530
49301	331.081	[M+H]+	330.074	0	Tricin	C17H14O7		C10193	NO	metabo_info.php?molid=49301
49307	331.081	[M+H]+	330.074	0	Apometzgerin	C17H14O7			NO	metabo_info.php?molid=49307
49375	331.081	[M+H]+	330.074	0	Isoetin 5,7-dimethyl ether	C17H14O7			NO	metabo_info.php?molid=49375
49652	331.081	[M+H]+	330.074	0	Cirsiliol	C17H14O7		C10033	NO	metabo_info.php?molid=49652
49659	331.081	[M+H]+	330.074	0	6-Hydroxyluteolin 5,6-dimethyl ether	C17H14O7			NO	metabo_info.php?molid=49659
49660	331.081	[M+H]+	330.074	0	Jaceosidin	C17H14O7			NO	metabo_info.php?molid=49660
49661	331.081	[M+H]+	330.074	0	Desmethoxycentaureidin	C17H14O7			NO	metabo_info.php?molid=49661
49662	331.081	[M+H]+	330.074	0	6-Hydroxyluteolin 7,3\'-dimethyl ether	C17H14O7			NO	metabo_info.php?molid=49662
49663	331.081	[M+H]+	330.074	0	Nuchensin	C17H14O7			NO	metabo_info.php?molid=49663
49711	331.081	[M+H]+	330.074	0	Tamaridone	C17H14O7			NO	metabo_info.php?molid=49711
49732	331.081	[M+H]+	330.074	0	Rehderianin I	C17H14O7			NO	metabo_info.php?molid=49732
49733	331.081	[M+H]+	330.074	0	Viscidulin II	C17H14O7			NO	metabo_info.php?molid=49733
49734	331.081	[M+H]+	330.074	0	5,7,2\'-Trihydroxy-8,6\'-dimethoxyflavone	C17H14O7			NO	metabo_info.php?molid=49734
49824	331.081	[M+H]+	330.074	0	Hypolaetin 8,3\'-dimethyl ether	C17H14O7			NO	metabo_info.php?molid=49824
49848	331.081	[M+H]+	330.074	0	5,8,2\'-Trihydroxy-6,7-dimethoxyflavone	C17H14O7			NO	metabo_info.php?molid=49848
49853	331.081	[M+H]+	330.074	0	5,7,2\'-trihydroxy-6,8-dimethoxyflavone	C17H14O7			NO	metabo_info.php?molid=49853
49867	331.081	[M+H]+	330.074	0	Desmethoxysudachitin	C17H14O7			NO	metabo_info.php?molid=49867
49868	331.081	[M+H]+	330.074	0	Thymusin	C17H14O7			NO	metabo_info.php?molid=49868
49869	331.081	[M+H]+	330.074	0	5,6,8-Trihydroxy-7,4\'-dimethoxyflavone	C17H14O7			NO	metabo_info.php?molid=49869
49876	331.081	[M+H]+	330.074	0	Isothymusin	C17H14O7			NO	metabo_info.php?molid=49876
49877	331.081	[M+H]+	330.074	0	5,6,7-Trihydroxy-8,4\'-dimethoxyflavone	C17H14O7			NO	metabo_info.php?molid=49877
49997	331.081	[M+H]+	330.074	0	Laurentinol	C17H14O7			NO	metabo_info.php?molid=49997
50026	331.081	[M+H]+	330.074	0	7,3\',4\'-Trihydroxy-3,8-dimethoxyflavone	C17H14O7			NO	metabo_info.php?molid=50026
50027	331.081	[M+H]+	330.074	0	7,8,4\'-Trihydroxy-3,3\'-dimethoxyflavone	C17H14O7			NO	metabo_info.php?molid=50027
50044	331.081	[M+H]+	330.074	0	3,5,2\'-Trihydroxy-7,5\'-dimethoxyflavone	C17H14O7			NO	metabo_info.php?molid=50044
50075	331.081	[M+H]+	330.074	0	Morelosin	C17H14O7			NO	metabo_info.php?molid=50075
50827	331.081	[M+H]+	330.074	0	Dillenetin	C17H14O7			NO	metabo_info.php?molid=50827
50962	331.081	[M+H]+	330.074	0	Quercetin 5,3\'-dimethyl ether	C17H14O7			NO	metabo_info.php?molid=50962
50963	331.081	[M+H]+	330.074	0	Quercetin 5,4\'-dimethyl ether	C17H14O7			NO	metabo_info.php?molid=50963
51055	331.081	[M+H]+	330.074	0	Rhamnazin	C17H14O7			NO	metabo_info.php?molid=51055
51066	331.081	[M+H]+	330.074	0	Ombuin	C17H14O7			NO	metabo_info.php?molid=51066
51136	331.081	[M+H]+	330.074	0	6-C-Methylquercetin 3-methyl ether	C17H14O7			NO	metabo_info.php?molid=51136
51137	331.081	[M+H]+	330.074	0	8-C-Methylquercetin 3-methyl ether	C17H14O7			NO	metabo_info.php?molid=51137
51144	331.081	[M+H]+	330.074	0	Caryatin	C17H14O7			NO	metabo_info.php?molid=51144
51145	331.081	[M+H]+	330.074	0	Quercetin 3,7-dimethyl ether	C17H14O7		C01265	NO	metabo_info.php?molid=51145
51166	331.081	[M+H]+	330.074	0	Quercetin 3,3\'-dimethyl ether	C17H14O7			NO	metabo_info.php?molid=51166
51175	331.081	[M+H]+	330.074	0	Quercetin 3,4\'-dimethyl ether	C17H14O7			NO	metabo_info.php?molid=51175
51279	331.081	[M+H]+	330.074	0	6-Methoxykaempferol 3-methyl ether	C17H14O7			NO	metabo_info.php?molid=51279
51280	331.081	[M+H]+	330.074	0	6-Hydroxykaempferol 3,7-dimethyl ether	C17H14O7			NO	metabo_info.php?molid=51280
51281	331.081	[M+H]+	330.074	0	6-Hydroxykaempferol 5,6-dimethyl ether	C17H14O7			NO	metabo_info.php?molid=51281
51282	331.081	[M+H]+	330.074	0	Eupalitin	C17H14O7			NO	metabo_info.php?molid=51282
51283	331.081	[M+H]+	330.074	0	Betuletol	C17H14O7			NO	metabo_info.php?molid=51283
51284	331.081	[M+H]+	330.074	0	3,5,6-Trihydroxy-7,4\'-dimethoxyflavone	C17H14O7			NO	metabo_info.php?molid=51284
51291	331.081	[M+H]+	330.074	0	6-Hydroxykaempferol 3,4\'-dimethyl ether	C17H14O7			NO	metabo_info.php?molid=51291
51567	331.081	[M+H]+	330.074	0	Herbacetin 3,7-dimethyl ether	C17H14O7			NO	metabo_info.php?molid=51567
51568	331.081	[M+H]+	330.074	0	Herbacetin 3,8-dimethyl ether	C17H14O7			NO	metabo_info.php?molid=51568
51569	331.081	[M+H]+	330.074	0	Herbacetin 7,8-dimethyl ether	C17H14O7			NO	metabo_info.php?molid=51569
51570	331.081	[M+H]+	330.074	0	Herbacetin 7,4\'-dimethyl ether	C17H14O7			NO	metabo_info.php?molid=51570
51571	331.081	[M+H]+	330.074	0	Prudomestin	C17H14O7			NO	metabo_info.php?molid=51571
51583	331.081	[M+H]+	330.074	0	5,7,8-Trihydroxy-3,4\'-dimethoxyflavone	C17H14O7			NO	metabo_info.php?molid=51583
51704	331.081	[M+H]+	330.074	0	3,5,7-Trihydroxy-6,8-dimethoxyflavone	C17H14O7			NO	metabo_info.php?molid=51704
51711	331.081	[M+H]+	330.074	0	5,7,8-Trihydroxy-3,6-dimethoxyflavone	C17H14O7			NO	metabo_info.php?molid=51711
53176	331.081	[M+H]+	330.074	0	Remerin	C17H14O7			NO	metabo_info.php?molid=53176
65888	331.081	[M+H]+	330.074	0	(+)-Bisdechlorogeodin	C17H14O7	59092-96-5	C03036	NO	metabo_info.php?molid=65888
65890	331.081	[M+H]+	330.074	0	(-)-Bisdechlorogeodin	C17H14O7	59187-35-8	C03040	NO	metabo_info.php?molid=65890
71314	331.081	[M+H]+	330.074	0	Aflatoxin G2	C17H14O7	7241-98-7	C16754	NO	metabo_info.php?molid=71314
71850	331.081	[M+H]+	330.074	0	Aurantio-obtusin	C17H14O7	67979-25-3	C17670	NO	metabo_info.php?molid=71850
87006	331.081	[M+H]+	330.074	0	Aflatoxin M2	C17H14O7	6885-57-0		NO	metabo_info.php?molid=87006
87880	331.081	[M+H]+	330.074	0	3,4-Dihydroxyphenacyl caffeate	C17H14O7	162616-81-1		NO	metabo_info.php?molid=87880
89129	331.081	[M+H]+	330.074	0	1,3,5-Trihydroxy-6,7-dimethoxy-2-methylanthraquinone	C17H14O7	38934-17-7		NO	metabo_info.php?molid=89129
90875	331.081	[M+H]+	330.074	0	Aflatoxin B2a	C17H14O7	17878-54-5		NO	metabo_info.php?molid=90875
92071	331.081	[M+H]+	330.074	0	Pilosin	C17H14O7			NO	metabo_info.php?molid=92071
93318	331.081	[M+H]+	330.074	0	Cicerin	C17H14O7	12751-00-7		NO	metabo_info.php?molid=93318
96048	331.081	[M+H]+	330.074	0	5,7-Dihydroxy-8,4&#39
67925	331.081	[M+Na]+	308.09	7	Allamandin	C15H16O7	51820-82-7	C09766	NO	metabo_info.php?molid=67925
95167	331.081	[M+Na]+	308.09	7	4R,5R,6S-Trihydroxy-2-hydroxymethyl-2-cyclohexen-1-one 6-(2-hydroxy-6-methylbenzoate)	C15H16O7	146475-71-0		NO	metabo_info.php?molid=95167
72702	331.081	[M+Na]+	308.094	6	Mecarbinzid	C13H16N4O3S	27386-64-7	C18942	NO	metabo_info.php?molid=72702
95683	331.081	[M+K]+	292.116	6	Pantoyllactone glucoside	C12H20O8			NO	metabo_info.php?molid=95683
45431	331.081	[M+K]+	292.121	9	(-)-Blebbistatin	C18H16N2O2	856925-71-8		YES	metabo_info.php?molid=45431
45474	331.081	[M+K]+	292.121	9	(+)-Blebbistatin	C18H16N2O2	NA		YES	metabo_info.php?molid=45474
45484	331.081	[M+K]+	292.121	9	(&plusmn
68886	331.081	[M+K]+	292.121	9	N-(2-Methoxyphenyl)-N\'-(2-naphtyl)urea	C18H16N2O2		C11163	NO	metabo_info.php?molid=68886
101	702.066	[M+K]+	663.109	8	Nicotinamide adenine dinucleotide (NAD)	C21H27N7O14P2	53-84-9	C00003	YES	metabo_info.php?molid=101
93995	702.066	[M+K]+	663.109	8	Fenugreekine	C21H27N7O14P2	55069-02-8		NO	metabo_info.php?molid=93995
36812	919.72	[M+K]+	880.752	5	TG(17:0/17:2(9Z,12Z)/20:3(8Z,11Z,14Z))[iso6]	C57H100O6			NO	metabo_info.php?molid=36812
36813	919.72	[M+K]+	880.752	5	TG(17:1(9Z)/17:1(9Z)/20:3(8Z,11Z,14Z))[iso3]	C57H100O6			NO	metabo_info.php?molid=36813
36816	919.72	[M+K]+	880.752	5	TG(17:0/17:1(9Z)/20:4(5Z,8Z,11Z,14Z))[iso6]	C57H100O6			NO	metabo_info.php?molid=36816
36819	919.72	[M+K]+	880.752	5	TG(17:0/17:0/20:5(5Z,8Z,11Z,14Z,17Z))[iso3]	C57H100O6			NO	metabo_info.php?molid=36819
36826	919.72	[M+K]+	880.752	5	TG(18:1(9Z)/18:2(9Z,12Z)/18:2(9Z,12Z))[iso3]	C57H100O6			NO	metabo_info.php?molid=36826
36828	919.72	[M+K]+	880.752	5	TG(18:0/18:2(9Z,12Z)/18:3(9Z,12Z,15Z))[iso6]	C57H100O6			NO	metabo_info.php?molid=36828
36829	919.72	[M+K]+	880.752	5	TG(18:1(9Z)/18:1(9Z)/18:3(9Z,12Z,15Z))[iso3]	C57H100O6			NO	metabo_info.php?molid=36829
36841	919.72	[M+K]+	880.752	5	TG(16:1(9Z)/18:3(9Z,12Z,15Z)/20:1(11Z))[iso6]	C57H100O6			NO	metabo_info.php?molid=36841
36845	919.72	[M+K]+	880.752	5	TG(16:0/18:3(9Z,12Z,15Z)/20:2(11Z,14Z))[iso6]	C57H100O6			NO	metabo_info.php?molid=36845
36846	919.72	[M+K]+	880.752	5	TG(16:1(9Z)/18:2(9Z,12Z)/20:2(11Z,14Z))[iso6]	C57H100O6			NO	metabo_info.php?molid=36846
36850	919.72	[M+K]+	880.752	5	TG(16:0/18:2(9Z,12Z)/20:3(8Z,11Z,14Z))[iso6]	C57H100O6			NO	metabo_info.php?molid=36850
36851	919.72	[M+K]+	880.752	5	TG(16:1(9Z)/18:1(9Z)/20:3(8Z,11Z,14Z))[iso6]	C57H100O6			NO	metabo_info.php?molid=36851
36854	919.72	[M+K]+	880.752	5	TG(16:0/18:1(9Z)/20:4(5Z,8Z,11Z,14Z))[iso6]	C57H100O6			NO	metabo_info.php?molid=36854
36855	919.72	[M+K]+	880.752	5	TG(16:1(9Z)/18:0/20:4(5Z,8Z,11Z,14Z))[iso6]	C57H100O6			NO	metabo_info.php?molid=36855
36858	919.72	[M+K]+	880.752	5	TG(16:0/18:0/20:5(5Z,8Z,11Z,14Z,17Z))[iso6]	C57H100O6			NO	metabo_info.php?molid=36858
36874	919.72	[M+K]+	880.752	5	TG(17:2(9Z,12Z)/18:3(9Z,12Z,15Z)/19:0)[iso6]	C57H100O6			NO	metabo_info.php?molid=36874
36915	919.72	[M+K]+	880.752	5	TG(16:1(9Z)/16:1(9Z)/22:3(10Z,13Z,16Z))[iso3]	C57H100O6			NO	metabo_info.php?molid=36915
36968	919.72	[M+K]+	880.752	5	TG(16:0/16:1(9Z)/22:4(7Z,10Z,13Z,16Z))[iso6]	C57H100O6			NO	metabo_info.php?molid=36968
36969	919.72	[M+K]+	880.752	5	TG(16:0/16:0/22:5(7Z,10Z,13Z,16Z,19Z))[iso3]	C57H100O6			NO	metabo_info.php?molid=36969
5066	919.72	[M+K]+	880.752	5	TG(17:2(9Z,12Z)/17:2(9Z,12Z)/20:1(11Z))[iso3]	C57H100O6			NO	metabo_info.php?molid=5066
5076	919.72	[M+K]+	880.752	5	TG(17:1(9Z)/17:2(9Z,12Z)/20:2(11Z,14Z))[iso6]	C57H100O6			NO	metabo_info.php?molid=5076
61747	919.72	[M+K]+	880.752	5	TG(18:1(11Z)/16:0/20:4(5Z,8Z,11Z,14Z))[iso6]	C57H100O6			NO	metabo_info.php?molid=61747
61765	919.72	[M+K]+	880.752	5	TG(18:1(9Z)/18:1(9Z)/18:3(6Z,9Z,12Z))[iso6]	C57H100O6			NO	metabo_info.php?molid=61765
61775	919.72	[M+K]+	880.752	5	TG(18:2(9Z,12Z)/18:0/18:3(9Z,12Z,15Z))[iso6]	C57H100O6			NO	metabo_info.php?molid=61775
61777	919.72	[M+K]+	880.752	5	TG(18:2(9Z,12Z)/18:1(11Z)/18:2(9Z,12Z))[iso3]	C57H100O6			NO	metabo_info.php?molid=61777
87418	919.72	[M+K]+	880.752	5	Glycerol 1,2-di-(9Z,12Z-octadecadienoate) 3-(9Z-octadecenoate)	C57H100O6	28409-91-8		NO	metabo_info.php?molid=87418
89830	919.72	[M+K]+	880.752	5	Glycerol 1,3-di-(9Z,12Z-octadecadienoate) 2-(9Z-octadecenoate)	C57H100O6	2190-22-9		NO	metabo_info.php?molid=89830
98718	919.72	[M+K]+	880.752	5	TG(14:1(9Z)/20:2(11Z,14Z)/20:2(11Z,14Z))[iso3]	C57H100O6			NO	metabo_info.php?molid=98718
99447	919.72	[M+K]+	880.752	5	TG(12:0/20:0/22:5(7Z,10Z,13Z,16Z,19Z))[iso6]	C57H100O6			NO	metabo_info.php?molid=99447
99458	919.72	[M+K]+	880.752	5	TG(12:0/20:1(11Z)/22:4(7Z,10Z,13Z,16Z))[iso6]	C57H100O6			NO	metabo_info.php?molid=99458
99468	919.72	[M+K]+	880.752	5	TG(12:0/20:2(11Z,14Z)/22:3(10Z,13Z,16Z))[iso6]	C57H100O6			NO	metabo_info.php?molid=99468
99477	919.72	[M+K]+	880.752	5	TG(12:0/20:3(8Z,11Z,14Z)/22:2(13Z,16Z))[iso6]	C57H100O6			NO	metabo_info.php?molid=99477
99485	919.72	[M+K]+	880.752	5	TG(12:0/20:4(5Z,8Z,11Z,14Z)/22:1(11Z))[iso6]	C57H100O6			NO	metabo_info.php?molid=99485
99492	919.72	[M+K]+	880.752	5	TG(12:0/20:5(5Z,8Z,11Z,14Z,17Z)/22:0)[iso6]	C57H100O6			NO	metabo_info.php?molid=99492
99885	919.72	[M+K]+	880.752	5	TG(13:0/19:0/22:5(7Z,10Z,13Z,16Z,19Z))[iso6]	C57H100O6			NO	metabo_info.php?molid=99885
99898	919.72	[M+K]+	880.752	5	TG(13:0/19:1(9Z)/22:4(7Z,10Z,13Z,16Z))[iso6]	C57H100O6			NO	metabo_info.php?molid=99898
99956	919.72	[M+K]+	880.752	5	TG(13:0/20:5(5Z,8Z,11Z,14Z,17Z)/21:0)[iso6]	C57H100O6			NO	metabo_info.php?molid=99956
100215	919.72	[M+K]+	880.752	5	TG(14:0/18:0/22:5(7Z,10Z,13Z,16Z,19Z))[iso6]	C57H100O6			NO	metabo_info.php?molid=100215
100234	919.72	[M+K]+	880.752	5	TG(14:0/18:1(9Z)/22:4(7Z,10Z,13Z,16Z))[iso6]	C57H100O6			NO	metabo_info.php?molid=100234
100252	919.72	[M+K]+	880.752	5	TG(14:0/18:2(9Z,12Z)/22:3(10Z,13Z,16Z))[iso6]	C57H100O6			NO	metabo_info.php?molid=100252
100269	919.72	[M+K]+	880.752	5	TG(14:0/18:3(6Z,9Z,12Z)/22:2(13Z,16Z))[iso6]	C57H100O6			NO	metabo_info.php?molid=100269
100286	919.72	[M+K]+	880.752	5	TG(14:0/18:3(9Z,12Z,15Z)/22:2(13Z,16Z))[iso6]	C57H100O6			NO	metabo_info.php?molid=100286
100301	919.72	[M+K]+	880.752	5	TG(14:0/18:4(6Z,9Z,12Z,15Z)/22:1(11Z))[iso6]	C57H100O6			NO	metabo_info.php?molid=100301
100340	919.72	[M+K]+	880.752	5	TG(14:0/20:0/20:5(5Z,8Z,11Z,14Z,17Z))[iso6]	C57H100O6			NO	metabo_info.php?molid=100340
100351	919.72	[M+K]+	880.752	5	TG(14:0/20:1(11Z)/20:4(5Z,8Z,11Z,14Z))[iso6]	C57H100O6			NO	metabo_info.php?molid=100351
100361	919.72	[M+K]+	880.752	5	TG(14:0/20:2(11Z,14Z)/20:3(8Z,11Z,14Z))[iso6]	C57H100O6			NO	metabo_info.php?molid=100361
100620	919.72	[M+K]+	880.752	5	TG(14:1(9Z)/18:0/22:4(7Z,10Z,13Z,16Z))[iso6]	C57H100O6			NO	metabo_info.php?molid=100620
100639	919.72	[M+K]+	880.752	5	TG(14:1(9Z)/18:1(9Z)/22:3(10Z,13Z,16Z))[iso6]	C57H100O6			NO	metabo_info.php?molid=100639
100657	919.72	[M+K]+	880.752	5	TG(14:1(9Z)/18:2(9Z,12Z)/22:2(13Z,16Z))[iso6]	C57H100O6			NO	metabo_info.php?molid=100657
100674	919.72	[M+K]+	880.752	5	TG(14:1(9Z)/18:3(6Z,9Z,12Z)/22:1(11Z))[iso6]	C57H100O6			NO	metabo_info.php?molid=100674
100691	919.72	[M+K]+	880.752	5	TG(14:1(9Z)/18:3(9Z,12Z,15Z)/22:1(11Z))[iso6]	C57H100O6			NO	metabo_info.php?molid=100691
100706	919.72	[M+K]+	880.752	5	TG(14:1(9Z)/18:4(6Z,9Z,12Z,15Z)/22:0)[iso6]	C57H100O6			NO	metabo_info.php?molid=100706
100745	919.72	[M+K]+	880.752	5	TG(14:1(9Z)/20:0/20:4(5Z,8Z,11Z,14Z))[iso6]	C57H100O6			NO	metabo_info.php?molid=100745
100756	919.72	[M+K]+	880.752	5	TG(14:1(9Z)/20:1(11Z)/20:3(8Z,11Z,14Z))[iso6]	C57H100O6			NO	metabo_info.php?molid=100756
100930	919.72	[M+K]+	880.752	5	TG(15:0/17:0/22:5(7Z,10Z,13Z,16Z,19Z))[iso6]	C57H100O6			NO	metabo_info.php?molid=100930
100952	919.72	[M+K]+	880.752	5	TG(15:0/17:1(9Z)/22:4(7Z,10Z,13Z,16Z))[iso6]	C57H100O6			NO	metabo_info.php?molid=100952
100973	919.72	[M+K]+	880.752	5	TG(15:0/17:2(9Z,12Z)/22:3(10Z,13Z,16Z))[iso6]	C57H100O6			NO	metabo_info.php?molid=100973
101090	919.72	[M+K]+	880.752	5	TG(15:0/19:0/20:5(5Z,8Z,11Z,14Z,17Z))[iso6]	C57H100O6			NO	metabo_info.php?molid=101090
101103	919.72	[M+K]+	880.752	5	TG(15:0/19:1(9Z)/20:4(5Z,8Z,11Z,14Z))[iso6]	C57H100O6			NO	metabo_info.php?molid=101103
101276	919.72	[M+K]+	880.752	5	TG(15:1(9Z)/17:0/22:4(7Z,10Z,13Z,16Z))[iso6]	C57H100O6			NO	metabo_info.php?molid=101276
101298	919.72	[M+K]+	880.752	5	TG(15:1(9Z)/17:1(9Z)/22:3(10Z,13Z,16Z))[iso6]	C57H100O6			NO	metabo_info.php?molid=101298
101319	919.72	[M+K]+	880.752	5	TG(15:1(9Z)/17:2(9Z,12Z)/22:2(13Z,16Z))[iso6]	C57H100O6			NO	metabo_info.php?molid=101319
101427	919.72	[M+K]+	880.752	5	TG(15:1(9Z)/18:4(6Z,9Z,12Z,15Z)/21:0)[iso6]	C57H100O6			NO	metabo_info.php?molid=101427
101440	919.72	[M+K]+	880.752	5	TG(15:1(9Z)/19:0/20:4(5Z,8Z,11Z,14Z))[iso6]	C57H100O6			NO	metabo_info.php?molid=101440
101453	919.72	[M+K]+	880.752	5	TG(15:1(9Z)/19:1(9Z)/20:3(8Z,11Z,14Z))[iso6]	C57H100O6			NO	metabo_info.php?molid=101453
101589	919.72	[M+K]+	880.752	5	TG(16:0/18:3(6Z,9Z,12Z)/20:2(11Z,14Z))[iso6]	C57H100O6			NO	metabo_info.php?molid=101589
101607	919.72	[M+K]+	880.752	5	TG(16:0/18:4(6Z,9Z,12Z,15Z)/20:1(11Z))[iso6]	C57H100O6			NO	metabo_info.php?molid=101607
101679	919.72	[M+K]+	880.752	5	TG(16:1(9Z)/18:3(6Z,9Z,12Z)/20:1(11Z))[iso6]	C57H100O6			NO	metabo_info.php?molid=101679
101697	919.72	[M+K]+	880.752	5	TG(16:1(9Z)/18:4(6Z,9Z,12Z,15Z)/20:0)[iso6]	C57H100O6			NO	metabo_info.php?molid=101697
101783	919.72	[M+K]+	880.752	5	TG(17:0/18:4(6Z,9Z,12Z,15Z)/19:1(9Z))[iso6]	C57H100O6			NO	metabo_info.php?molid=101783
101847	919.72	[M+K]+	880.752	5	TG(17:1(9Z)/18:3(6Z,9Z,12Z)/19:1(9Z))[iso6]	C57H100O6			NO	metabo_info.php?molid=101847
101863	919.72	[M+K]+	880.752	5	TG(17:1(9Z)/18:3(9Z,12Z,15Z)/19:1(9Z))[iso6]	C57H100O6			NO	metabo_info.php?molid=101863
101865	919.72	[M+K]+	880.752	5	TG(17:1(9Z)/18:4(6Z,9Z,12Z,15Z)/19:0)[iso6]	C57H100O6			NO	metabo_info.php?molid=101865
101921	919.72	[M+K]+	880.752	5	TG(17:2(9Z,12Z)/18:2(9Z,12Z)/19:1(9Z))[iso6]	C57H100O6			NO	metabo_info.php?molid=101921
101925	919.72	[M+K]+	880.752	5	TG(17:2(9Z,12Z)/18:3(6Z,9Z,12Z)/19:0)[iso6]	C57H100O6			NO	metabo_info.php?molid=101925
101991	919.72	[M+K]+	880.752	5	TG(18:0/18:1(9Z)/18:4(6Z,9Z,12Z,15Z))[iso6]	C57H100O6			NO	metabo_info.php?molid=101991
101994	919.72	[M+K]+	880.752	5	TG(18:0/18:2(9Z,12Z)/18:3(6Z,9Z,12Z))[iso6]	C57H100O6			NO	metabo_info.php?molid=101994
4837	891.688	[M+K]+	852.721	5	TG(17:2(9Z,12Z)/17:2(9Z,12Z)/18:1(9Z))[iso3]	C55H96O6			NO	metabo_info.php?molid=4837
4841	891.688	[M+K]+	852.721	5	TG(17:1(9Z)/17:2(9Z,12Z)/18:2(9Z,12Z))[iso6]	C55H96O6			NO	metabo_info.php?molid=4841
4844	891.688	[M+K]+	852.721	5	TG(17:0/17:2(9Z,12Z)/18:3(9Z,12Z,15Z))[iso6]	C55H96O6			NO	metabo_info.php?molid=4844
4845	891.688	[M+K]+	852.721	5	TG(17:1(9Z)/17:1(9Z)/18:3(9Z,12Z,15Z))[iso3]	C55H96O6			NO	metabo_info.php?molid=4845
4859	891.688	[M+K]+	852.721	5	TG(16:1(9Z)/18:2(9Z,12Z)/18:2(9Z,12Z))[iso3]	C55H96O6			NO	metabo_info.php?molid=4859
4864	891.688	[M+K]+	852.721	5	TG(16:0/18:2(9Z,12Z)/18:3(9Z,12Z,15Z))[iso6]	C55H96O6			NO	metabo_info.php?molid=4864
4865	891.688	[M+K]+	852.721	5	TG(16:1(9Z)/18:1(9Z)/18:3(9Z,12Z,15Z))[iso6]	C55H96O6			NO	metabo_info.php?molid=4865
4880	891.688	[M+K]+	852.721	5	TG(16:1(9Z)/16:1(9Z)/20:3(8Z,11Z,14Z))[iso3]	C55H96O6			NO	metabo_info.php?molid=4880
4881	891.688	[M+K]+	852.721	5	TG(16:0/16:1(9Z)/20:4(5Z,8Z,11Z,14Z))[iso6]	C55H96O6			NO	metabo_info.php?molid=4881
4882	891.688	[M+K]+	852.721	5	TG(16:0/16:0/20:5(5Z,8Z,11Z,14Z,17Z))[iso3]	C55H96O6			NO	metabo_info.php?molid=4882
61756	891.688	[M+K]+	852.721	5	TG(18:1(9Z)/14:0/20:4(5Z,8Z,11Z,14Z))[iso6]	C55H96O6			NO	metabo_info.php?molid=61756
61771	891.688	[M+K]+	852.721	5	TG(18:2(9Z,12Z)/16:0/18:3(9Z,12Z,15Z))[iso6]	C55H96O6			NO	metabo_info.php?molid=61771
98756	891.688	[M+K]+	852.721	5	TG(15:0/15:0/22:5(7Z,10Z,13Z,16Z,19Z))[iso3]	C55H96O6			NO	metabo_info.php?molid=98756
98807	891.688	[M+K]+	852.721	5	TG(15:1(9Z)/15:1(9Z)/22:3(10Z,13Z,16Z))[iso3]	C55H96O6			NO	metabo_info.php?molid=98807
98862	891.688	[M+K]+	852.721	5	TG(17:1(9Z)/17:1(9Z)/18:3(6Z,9Z,12Z))[iso3]	C55H96O6			NO	metabo_info.php?molid=98862
99315	891.688	[M+K]+	852.721	5	TG(12:0/18:0/22:5(7Z,10Z,13Z,16Z,19Z))[iso6]	C55H96O6			NO	metabo_info.php?molid=99315
99334	891.688	[M+K]+	852.721	5	TG(12:0/18:1(9Z)/22:4(7Z,10Z,13Z,16Z))[iso6]	C55H96O6			NO	metabo_info.php?molid=99334
99352	891.688	[M+K]+	852.721	5	TG(12:0/18:2(9Z,12Z)/22:3(10Z,13Z,16Z))[iso6]	C55H96O6			NO	metabo_info.php?molid=99352
99369	891.688	[M+K]+	852.721	5	TG(12:0/18:3(6Z,9Z,12Z)/22:2(13Z,16Z))[iso6]	C55H96O6			NO	metabo_info.php?molid=99369
99386	891.688	[M+K]+	852.721	5	TG(12:0/18:3(9Z,12Z,15Z)/22:2(13Z,16Z))[iso6]	C55H96O6			NO	metabo_info.php?molid=99386
99401	891.688	[M+K]+	852.721	5	TG(12:0/18:4(6Z,9Z,12Z,15Z)/22:1(11Z))[iso6]	C55H96O6			NO	metabo_info.php?molid=99401
99440	891.688	[M+K]+	852.721	5	TG(12:0/20:0/20:5(5Z,8Z,11Z,14Z,17Z))[iso6]	C55H96O6			NO	metabo_info.php?molid=99440
99451	891.688	[M+K]+	852.721	5	TG(12:0/20:1(11Z)/20:4(5Z,8Z,11Z,14Z))[iso6]	C55H96O6			NO	metabo_info.php?molid=99451
99461	891.688	[M+K]+	852.721	5	TG(12:0/20:2(11Z,14Z)/20:3(8Z,11Z,14Z))[iso6]	C55H96O6			NO	metabo_info.php?molid=99461
99714	891.688	[M+K]+	852.721	5	TG(13:0/17:0/22:5(7Z,10Z,13Z,16Z,19Z))[iso6]	C55H96O6			NO	metabo_info.php?molid=99714
99736	891.688	[M+K]+	852.721	5	TG(13:0/17:1(9Z)/22:4(7Z,10Z,13Z,16Z))[iso6]	C55H96O6			NO	metabo_info.php?molid=99736
99757	891.688	[M+K]+	852.721	5	TG(13:0/17:2(9Z,12Z)/22:3(10Z,13Z,16Z))[iso6]	C55H96O6			NO	metabo_info.php?molid=99757
99878	891.688	[M+K]+	852.721	5	TG(13:0/19:0/20:5(5Z,8Z,11Z,14Z,17Z))[iso6]	C55H96O6			NO	metabo_info.php?molid=99878
99891	891.688	[M+K]+	852.721	5	TG(13:0/19:1(9Z)/20:4(5Z,8Z,11Z,14Z))[iso6]	C55H96O6			NO	metabo_info.php?molid=99891
100100	891.688	[M+K]+	852.721	5	TG(14:0/16:0/22:5(7Z,10Z,13Z,16Z,19Z))[iso6]	C55H96O6			NO	metabo_info.php?molid=100100
100124	891.688	[M+K]+	852.721	5	TG(14:0/16:1(9Z)/22:4(7Z,10Z,13Z,16Z))[iso6]	C55H96O6			NO	metabo_info.php?molid=100124
100208	891.688	[M+K]+	852.721	5	TG(14:0/18:0/20:5(5Z,8Z,11Z,14Z,17Z))[iso6]	C55H96O6			NO	metabo_info.php?molid=100208
100227	891.688	[M+K]+	852.721	5	TG(14:0/18:1(9Z)/20:4(5Z,8Z,11Z,14Z))[iso6]	C55H96O6			NO	metabo_info.php?molid=100227
100245	891.688	[M+K]+	852.721	5	TG(14:0/18:2(9Z,12Z)/20:3(8Z,11Z,14Z))[iso6]	C55H96O6			NO	metabo_info.php?molid=100245
100262	891.688	[M+K]+	852.721	5	TG(14:0/18:3(6Z,9Z,12Z)/20:2(11Z,14Z))[iso6]	C55H96O6			NO	metabo_info.php?molid=100262
100279	891.688	[M+K]+	852.721	5	TG(14:0/18:3(9Z,12Z,15Z)/20:2(11Z,14Z))[iso6]	C55H96O6			NO	metabo_info.php?molid=100279
100294	891.688	[M+K]+	852.721	5	TG(14:0/18:4(6Z,9Z,12Z,15Z)/20:1(11Z))[iso6]	C55H96O6			NO	metabo_info.php?molid=100294
100505	891.688	[M+K]+	852.721	5	TG(14:1(9Z)/16:0/22:4(7Z,10Z,13Z,16Z))[iso6]	C55H96O6			NO	metabo_info.php?molid=100505
100529	891.688	[M+K]+	852.721	5	TG(14:1(9Z)/16:1(9Z)/22:3(10Z,13Z,16Z))[iso6]	C55H96O6			NO	metabo_info.php?molid=100529
100613	891.688	[M+K]+	852.721	5	TG(14:1(9Z)/18:0/20:4(5Z,8Z,11Z,14Z))[iso6]	C55H96O6			NO	metabo_info.php?molid=100613
100632	891.688	[M+K]+	852.721	5	TG(14:1(9Z)/18:1(9Z)/20:3(8Z,11Z,14Z))[iso6]	C55H96O6			NO	metabo_info.php?molid=100632
100650	891.688	[M+K]+	852.721	5	TG(14:1(9Z)/18:2(9Z,12Z)/20:2(11Z,14Z))[iso6]	C55H96O6			NO	metabo_info.php?molid=100650
100667	891.688	[M+K]+	852.721	5	TG(14:1(9Z)/18:3(6Z,9Z,12Z)/20:1(11Z))[iso6]	C55H96O6			NO	metabo_info.php?molid=100667
100684	891.688	[M+K]+	852.721	5	TG(14:1(9Z)/18:3(9Z,12Z,15Z)/20:1(11Z))[iso6]	C55H96O6			NO	metabo_info.php?molid=100684
100699	891.688	[M+K]+	852.721	5	TG(14:1(9Z)/18:4(6Z,9Z,12Z,15Z)/20:0)[iso6]	C55H96O6			NO	metabo_info.php?molid=100699
100857	891.688	[M+K]+	852.721	5	TG(15:0/15:1(9Z)/22:4(7Z,10Z,13Z,16Z))[iso6]	C55H96O6			NO	metabo_info.php?molid=100857
100923	891.688	[M+K]+	852.721	5	TG(15:0/17:0/20:5(5Z,8Z,11Z,14Z,17Z))[iso6]	C55H96O6			NO	metabo_info.php?molid=100923
100945	891.688	[M+K]+	852.721	5	TG(15:0/17:1(9Z)/20:4(5Z,8Z,11Z,14Z))[iso6]	C55H96O6			NO	metabo_info.php?molid=100945
100966	891.688	[M+K]+	852.721	5	TG(15:0/17:2(9Z,12Z)/20:3(8Z,11Z,14Z))[iso6]	C55H96O6			NO	metabo_info.php?molid=100966
101069	891.688	[M+K]+	852.721	5	TG(15:0/18:4(6Z,9Z,12Z,15Z)/19:1(9Z))[iso6]	C55H96O6			NO	metabo_info.php?molid=101069
101269	891.688	[M+K]+	852.721	5	TG(15:1(9Z)/17:0/20:4(5Z,8Z,11Z,14Z))[iso6]	C55H96O6			NO	metabo_info.php?molid=101269
101291	891.688	[M+K]+	852.721	5	TG(15:1(9Z)/17:1(9Z)/20:3(8Z,11Z,14Z))[iso6]	C55H96O6			NO	metabo_info.php?molid=101291
101312	891.688	[M+K]+	852.721	5	TG(15:1(9Z)/17:2(9Z,12Z)/20:2(11Z,14Z))[iso6]	C55H96O6			NO	metabo_info.php?molid=101312
101387	891.688	[M+K]+	852.721	5	TG(15:1(9Z)/18:3(6Z,9Z,12Z)/19:1(9Z))[iso6]	C55H96O6			NO	metabo_info.php?molid=101387
101404	891.688	[M+K]+	852.721	5	TG(15:1(9Z)/18:3(9Z,12Z,15Z)/19:1(9Z))[iso6]	C55H96O6			NO	metabo_info.php?molid=101404
101419	891.688	[M+K]+	852.721	5	TG(15:1(9Z)/18:4(6Z,9Z,12Z,15Z)/19:0)[iso6]	C55H96O6			NO	metabo_info.php?molid=101419
101576	891.688	[M+K]+	852.721	5	TG(16:0/18:1(9Z)/18:4(6Z,9Z,12Z,15Z))[iso6]	C55H96O6			NO	metabo_info.php?molid=101576
101579	891.688	[M+K]+	852.721	5	TG(16:0/18:2(9Z,12Z)/18:3(6Z,9Z,12Z))[iso6]	C55H96O6			NO	metabo_info.php?molid=101579
101663	891.688	[M+K]+	852.721	5	TG(16:1(9Z)/18:0/18:4(6Z,9Z,12Z,15Z))[iso6]	C55H96O6			NO	metabo_info.php?molid=101663
101666	891.688	[M+K]+	852.721	5	TG(16:1(9Z)/18:1(9Z)/18:3(6Z,9Z,12Z))[iso6]	C55H96O6			NO	metabo_info.php?molid=101666
101742	891.688	[M+K]+	852.721	5	TG(17:0/17:1(9Z)/18:4(6Z,9Z,12Z,15Z))[iso6]	C55H96O6			NO	metabo_info.php?molid=101742
101745	891.688	[M+K]+	852.721	5	TG(17:0/17:2(9Z,12Z)/18:3(6Z,9Z,12Z))[iso6]	C55H96O6			NO	metabo_info.php?molid=101745
6072	813.295	[M+Na]+	790.305	0	N,N-Diacetylchitobiosyldiphosphodolichol	C31H56N2O17P2			NO	metabo_info.php?molid=6072
113227	495.266	[M+H]+	494.256	5	Cys Phe Ile Ile	C24H38N4O5S			NO	metabo_info.php?molid=113227
113229	495.266	[M+H]+	494.256	5	Cys Phe Ile Leu	C24H38N4O5S			NO	metabo_info.php?molid=113229
113267	495.266	[M+H]+	494.256	5	Cys Phe Leu Ile	C24H38N4O5S			NO	metabo_info.php?molid=113267
113269	495.266	[M+H]+	494.256	5	Cys Phe Leu Leu	C24H38N4O5S			NO	metabo_info.php?molid=113269
114367	495.266	[M+H]+	494.256	5	Cys Ile Phe Ile	C24H38N4O5S			NO	metabo_info.php?molid=114367
114369	495.266	[M+H]+	494.256	5	Cys Ile Phe Leu	C24H38N4O5S			NO	metabo_info.php?molid=114369
114424	495.266	[M+H]+	494.256	5	Cys Ile Ile Phe	C24H38N4O5S			NO	metabo_info.php?molid=114424
114464	495.266	[M+H]+	494.256	5	Cys Ile Leu Phe	C24H38N4O5S			NO	metabo_info.php?molid=114464
115167	495.266	[M+H]+	494.256	5	Cys Leu Phe Ile	C24H38N4O5S			NO	metabo_info.php?molid=115167
115169	495.266	[M+H]+	494.256	5	Cys Leu Phe Leu	C24H38N4O5S			NO	metabo_info.php?molid=115169
115224	495.266	[M+H]+	494.256	5	Cys Leu Ile Phe	C24H38N4O5S			NO	metabo_info.php?molid=115224
115264	495.266	[M+H]+	494.256	5	Cys Leu Leu Phe	C24H38N4O5S			NO	metabo_info.php?molid=115264
136027	495.266	[M+H]+	494.256	5	Phe Cys Ile Ile	C24H38N4O5S			NO	metabo_info.php?molid=136027
136029	495.266	[M+H]+	494.256	5	Phe Cys Ile Leu	C24H38N4O5S			NO	metabo_info.php?molid=136029
136067	495.266	[M+H]+	494.256	5	Phe Cys Leu Ile	C24H38N4O5S			NO	metabo_info.php?molid=136067
136069	495.266	[M+H]+	494.256	5	Phe Cys Leu Leu	C24H38N4O5S			NO	metabo_info.php?molid=136069
138306	495.266	[M+H]+	494.256	5	Phe Ile Cys Ile	C24H38N4O5S			NO	metabo_info.php?molid=138306
138308	495.266	[M+H]+	494.256	5	Phe Ile Cys Leu	C24H38N4O5S			NO	metabo_info.php?molid=138308
138420	495.266	[M+H]+	494.256	5	Phe Ile Ile Cys	C24H38N4O5S			NO	metabo_info.php?molid=138420
138460	495.266	[M+H]+	494.256	5	Phe Ile Leu Cys	C24H38N4O5S			NO	metabo_info.php?molid=138460
139106	495.266	[M+H]+	494.256	5	Phe Leu Cys Ile	C24H38N4O5S			NO	metabo_info.php?molid=139106
139108	495.266	[M+H]+	494.256	5	Phe Leu Cys Leu	C24H38N4O5S			NO	metabo_info.php?molid=139108
139220	495.266	[M+H]+	494.256	5	Phe Leu Ile Cys	C24H38N4O5S			NO	metabo_info.php?molid=139220
139260	495.266	[M+H]+	494.256	5	Phe Leu Leu Cys	C24H38N4O5S			NO	metabo_info.php?molid=139260
139836	495.266	[M+H]+	494.256	5	Phe Met Val Val	C24H38N4O5S			NO	metabo_info.php?molid=139836
142496	495.266	[M+H]+	494.256	5	Phe Val Met Val	C24H38N4O5S			NO	metabo_info.php?molid=142496
142629	495.266	[M+H]+	494.256	5	Phe Val Val Met	C24H38N4O5S			NO	metabo_info.php?molid=142629
159966	495.266	[M+H]+	494.256	5	Ile Cys Phe Ile	C24H38N4O5S			NO	metabo_info.php?molid=159966
159968	495.266	[M+H]+	494.256	5	Ile Cys Phe Leu	C24H38N4O5S			NO	metabo_info.php?molid=159968
160023	495.266	[M+H]+	494.256	5	Ile Cys Ile Phe	C24H38N4O5S			NO	metabo_info.php?molid=160023
160063	495.266	[M+H]+	494.256	5	Ile Cys Leu Phe	C24H38N4O5S			NO	metabo_info.php?molid=160063
161106	495.266	[M+H]+	494.256	5	Ile Phe Cys Ile	C24H38N4O5S			NO	metabo_info.php?molid=161106
161108	495.266	[M+H]+	494.256	5	Ile Phe Cys Leu	C24H38N4O5S			NO	metabo_info.php?molid=161108
161220	495.266	[M+H]+	494.256	5	Ile Phe Ile Cys	C24H38N4O5S			NO	metabo_info.php?molid=161220
161260	495.266	[M+H]+	494.256	5	Ile Phe Leu Cys	C24H38N4O5S			NO	metabo_info.php?molid=161260
162303	495.266	[M+H]+	494.256	5	Ile Ile Cys Phe	C24H38N4O5S			NO	metabo_info.php?molid=162303
162360	495.266	[M+H]+	494.256	5	Ile Ile Phe Cys	C24H38N4O5S			NO	metabo_info.php?molid=162360
163103	495.266	[M+H]+	494.256	5	Ile Leu Cys Phe	C24H38N4O5S			NO	metabo_info.php?molid=163103
163160	495.266	[M+H]+	494.256	5	Ile Leu Phe Cys	C24H38N4O5S			NO	metabo_info.php?molid=163160
175966	495.266	[M+H]+	494.256	5	Leu Cys Phe Ile	C24H38N4O5S			NO	metabo_info.php?molid=175966
175968	495.266	[M+H]+	494.256	5	Leu Cys Phe Leu	C24H38N4O5S			NO	metabo_info.php?molid=175968
176023	495.266	[M+H]+	494.256	5	Leu Cys Ile Phe	C24H38N4O5S			NO	metabo_info.php?molid=176023
176063	495.266	[M+H]+	494.256	5	Leu Cys Leu Phe	C24H38N4O5S			NO	metabo_info.php?molid=176063
177106	495.266	[M+H]+	494.256	5	Leu Phe Cys Ile	C24H38N4O5S			NO	metabo_info.php?molid=177106
177108	495.266	[M+H]+	494.256	5	Leu Phe Cys Leu	C24H38N4O5S			NO	metabo_info.php?molid=177108
177220	495.266	[M+H]+	494.256	5	Leu Phe Ile Cys	C24H38N4O5S			NO	metabo_info.php?molid=177220
177260	495.266	[M+H]+	494.256	5	Leu Phe Leu Cys	C24H38N4O5S			NO	metabo_info.php?molid=177260
178303	495.266	[M+H]+	494.256	5	Leu Ile Cys Phe	C24H38N4O5S			NO	metabo_info.php?molid=178303
178360	495.266	[M+H]+	494.256	5	Leu Ile Phe Cys	C24H38N4O5S			NO	metabo_info.php?molid=178360
179103	495.266	[M+H]+	494.256	5	Leu Leu Cys Phe	C24H38N4O5S			NO	metabo_info.php?molid=179103
179160	495.266	[M+H]+	494.256	5	Leu Leu Phe Cys	C24H38N4O5S			NO	metabo_info.php?molid=179160
185436	495.266	[M+H]+	494.256	5	Met Phe Val Val	C24H38N4O5S			NO	metabo_info.php?molid=185436
190376	495.266	[M+H]+	494.256	5	Met Val Phe Val	C24H38N4O5S			NO	metabo_info.php?molid=190376
190623	495.266	[M+H]+	494.256	5	Met Val Val Phe	C24H38N4O5S			NO	metabo_info.php?molid=190623
241296	495.266	[M+H]+	494.256	5	Val Phe Met Val	C24H38N4O5S			NO	metabo_info.php?molid=241296
241429	495.266	[M+H]+	494.256	5	Val Phe Val Met	C24H38N4O5S			NO	metabo_info.php?molid=241429
243576	495.266	[M+H]+	494.256	5	Val Met Phe Val	C24H38N4O5S			NO	metabo_info.php?molid=243576
243823	495.266	[M+H]+	494.256	5	Val Met Val Phe	C24H38N4O5S			NO	metabo_info.php?molid=243823
246369	495.266	[M+H]+	494.256	5	Val Val Phe Met	C24H38N4O5S			NO	metabo_info.php?molid=246369
246483	495.266	[M+H]+	494.256	5	Val Val Met Phe	C24H38N4O5S			NO	metabo_info.php?molid=246483
154911	495.266	[M+H]+	494.26	2	His Lys Asn Pro	C21H34N8O6			NO	metabo_info.php?molid=154911
154930	495.266	[M+H]+	494.26	2	His Lys Pro Asn	C21H34N8O6			NO	metabo_info.php?molid=154930
156051	495.266	[M+H]+	494.26	2	His Asn Lys Pro	C21H34N8O6			NO	metabo_info.php?molid=156051
156127	495.266	[M+H]+	494.26	2	His Asn Pro Lys	C21H34N8O6			NO	metabo_info.php?molid=156127
156450	495.266	[M+H]+	494.26	2	His Pro Lys Asn	C21H34N8O6			NO	metabo_info.php?molid=156450
156507	495.266	[M+H]+	494.26	2	His Pro Asn Lys	C21H34N8O6			NO	metabo_info.php?molid=156507
170111	495.266	[M+H]+	494.26	2	Lys His Asn Pro	C21H34N8O6			NO	metabo_info.php?molid=170111
170130	495.266	[M+H]+	494.26	2	Lys His Pro Asn	C21H34N8O6			NO	metabo_info.php?molid=170130
172011	495.266	[M+H]+	494.26	2	Lys Asn His Pro	C21H34N8O6			NO	metabo_info.php?molid=172011
172125	495.266	[M+H]+	494.26	2	Lys Asn Pro His	C21H34N8O6			NO	metabo_info.php?molid=172125
172410	495.266	[M+H]+	494.26	2	Lys Pro His Asn	C21H34N8O6			NO	metabo_info.php?molid=172410
172505	495.266	[M+H]+	494.26	2	Lys Pro Asn His	C21H34N8O6			NO	metabo_info.php?molid=172505
194051	495.266	[M+H]+	494.26	2	Asn His Lys Pro	C21H34N8O6			NO	metabo_info.php?molid=194051
194127	495.266	[M+H]+	494.26	2	Asn His Pro Lys	C21H34N8O6			NO	metabo_info.php?molid=194127
194811	495.266	[M+H]+	494.26	2	Asn Lys His Pro	C21H34N8O6			NO	metabo_info.php?molid=194811
194925	495.266	[M+H]+	494.26	2	Asn Lys Pro His	C21H34N8O6			NO	metabo_info.php?molid=194925
196407	495.266	[M+H]+	494.26	2	Asn Pro His Lys	C21H34N8O6			NO	metabo_info.php?molid=196407
196445	495.266	[M+H]+	494.26	2	Asn Pro Lys His	C21H34N8O6			NO	metabo_info.php?molid=196445
202050	495.266	[M+H]+	494.26	2	Pro His Lys Asn	C21H34N8O6			NO	metabo_info.php?molid=202050
202107	495.266	[M+H]+	494.26	2	Pro His Asn Lys	C21H34N8O6			NO	metabo_info.php?molid=202107
202810	495.266	[M+H]+	494.26	2	Pro Lys His Asn	C21H34N8O6			NO	metabo_info.php?molid=202810
202905	495.266	[M+H]+	494.26	2	Pro Lys Asn His	C21H34N8O6			NO	metabo_info.php?molid=202905
204007	495.266	[M+H]+	494.26	2	Pro Asn His Lys	C21H34N8O6			NO	metabo_info.php?molid=204007
204045	495.266	[M+H]+	494.26	2	Pro Asn Lys His	C21H34N8O6			NO	metabo_info.php?molid=204045
162491	495.266	[M+Na]+	472.272	9	Ile Ile Met Pro	C22H40N4O5S			NO	metabo_info.php?molid=162491
162529	495.266	[M+Na]+	472.272	9	Ile Ile Pro Met	C22H40N4O5S			NO	metabo_info.php?molid=162529
163291	495.266	[M+Na]+	472.272	9	Ile Leu Met Pro	C22H40N4O5S			NO	metabo_info.php?molid=163291
163329	495.266	[M+Na]+	472.272	9	Ile Leu Pro Met	C22H40N4O5S			NO	metabo_info.php?molid=163329
163631	495.266	[M+Na]+	472.272	9	Ile Met Ile Pro	C22H40N4O5S			NO	metabo_info.php?molid=163631
163671	495.266	[M+Na]+	472.272	9	Ile Met Leu Pro	C22H40N4O5S			NO	metabo_info.php?molid=163671
163726	495.266	[M+Na]+	472.272	9	Ile Met Pro Ile	C22H40N4O5S			NO	metabo_info.php?molid=163726
163728	495.266	[M+Na]+	472.272	9	Ile Met Pro Leu	C22H40N4O5S			NO	metabo_info.php?molid=163728
164429	495.266	[M+Na]+	472.272	9	Ile Pro Ile Met	C22H40N4O5S			NO	metabo_info.php?molid=164429
164469	495.266	[M+Na]+	472.272	9	Ile Pro Leu Met	C22H40N4O5S			NO	metabo_info.php?molid=164469
164486	495.266	[M+Na]+	472.272	9	Ile Pro Met Ile	C22H40N4O5S			NO	metabo_info.php?molid=164486
164488	495.266	[M+Na]+	472.272	9	Ile Pro Met Leu	C22H40N4O5S			NO	metabo_info.php?molid=164488
178491	495.266	[M+Na]+	472.272	9	Leu Ile Met Pro	C22H40N4O5S			NO	metabo_info.php?molid=178491
178529	495.266	[M+Na]+	472.272	9	Leu Ile Pro Met	C22H40N4O5S			NO	metabo_info.php?molid=178529
179291	495.266	[M+Na]+	472.272	9	Leu Leu Met Pro	C22H40N4O5S			NO	metabo_info.php?molid=179291
179329	495.266	[M+Na]+	472.272	9	Leu Leu Pro Met	C22H40N4O5S			NO	metabo_info.php?molid=179329
179631	495.266	[M+Na]+	472.272	9	Leu Met Ile Pro	C22H40N4O5S			NO	metabo_info.php?molid=179631
179671	495.266	[M+Na]+	472.272	9	Leu Met Leu Pro	C22H40N4O5S			NO	metabo_info.php?molid=179671
179726	495.266	[M+Na]+	472.272	9	Leu Met Pro Ile	C22H40N4O5S			NO	metabo_info.php?molid=179726
179728	495.266	[M+Na]+	472.272	9	Leu Met Pro Leu	C22H40N4O5S			NO	metabo_info.php?molid=179728
180429	495.266	[M+Na]+	472.272	9	Leu Pro Ile Met	C22H40N4O5S			NO	metabo_info.php?molid=180429
180469	495.266	[M+Na]+	472.272	9	Leu Pro Leu Met	C22H40N4O5S			NO	metabo_info.php?molid=180469
180486	495.266	[M+Na]+	472.272	9	Leu Pro Met Ile	C22H40N4O5S			NO	metabo_info.php?molid=180486
180488	495.266	[M+Na]+	472.272	9	Leu Pro Met Leu	C22H40N4O5S			NO	metabo_info.php?molid=180488
186431	495.266	[M+Na]+	472.272	9	Met Ile Ile Pro	C22H40N4O5S			NO	metabo_info.php?molid=186431
186471	495.266	[M+Na]+	472.272	9	Met Ile Leu Pro	C22H40N4O5S			NO	metabo_info.php?molid=186471
186526	495.266	[M+Na]+	472.272	9	Met Ile Pro Ile	C22H40N4O5S			NO	metabo_info.php?molid=186526
186528	495.266	[M+Na]+	472.272	9	Met Ile Pro Leu	C22H40N4O5S			NO	metabo_info.php?molid=186528
187231	495.266	[M+Na]+	472.272	9	Met Leu Ile Pro	C22H40N4O5S			NO	metabo_info.php?molid=187231
187271	495.266	[M+Na]+	472.272	9	Met Leu Leu Pro	C22H40N4O5S			NO	metabo_info.php?molid=187271
187326	495.266	[M+Na]+	472.272	9	Met Leu Pro Ile	C22H40N4O5S			NO	metabo_info.php?molid=187326
187328	495.266	[M+Na]+	472.272	9	Met Leu Pro Leu	C22H40N4O5S			NO	metabo_info.php?molid=187328
188426	495.266	[M+Na]+	472.272	9	Met Pro Ile Ile	C22H40N4O5S			NO	metabo_info.php?molid=188426
188428	495.266	[M+Na]+	472.272	9	Met Pro Ile Leu	C22H40N4O5S			NO	metabo_info.php?molid=188428
188466	495.266	[M+Na]+	472.272	9	Met Pro Leu Ile	C22H40N4O5S			NO	metabo_info.php?molid=188466
188468	495.266	[M+Na]+	472.272	9	Met Pro Leu Leu	C22H40N4O5S			NO	metabo_info.php?molid=188468
202429	495.266	[M+Na]+	472.272	9	Pro Ile Ile Met	C22H40N4O5S			NO	metabo_info.php?molid=202429
202469	495.266	[M+Na]+	472.272	9	Pro Ile Leu Met	C22H40N4O5S			NO	metabo_info.php?molid=202469
202486	495.266	[M+Na]+	472.272	9	Pro Ile Met Ile	C22H40N4O5S			NO	metabo_info.php?molid=202486
202488	495.266	[M+Na]+	472.272	9	Pro Ile Met Leu	C22H40N4O5S			NO	metabo_info.php?molid=202488
203229	495.266	[M+Na]+	472.272	9	Pro Leu Ile Met	C22H40N4O5S			NO	metabo_info.php?molid=203229
203269	495.266	[M+Na]+	472.272	9	Pro Leu Leu Met	C22H40N4O5S			NO	metabo_info.php?molid=203269
203286	495.266	[M+Na]+	472.272	9	Pro Leu Met Ile	C22H40N4O5S			NO	metabo_info.php?molid=203286
203288	495.266	[M+Na]+	472.272	9	Pro Leu Met Leu	C22H40N4O5S			NO	metabo_info.php?molid=203288
203626	495.266	[M+Na]+	472.272	9	Pro Met Ile Ile	C22H40N4O5S			NO	metabo_info.php?molid=203626
203628	495.266	[M+Na]+	472.272	9	Pro Met Ile Leu	C22H40N4O5S			NO	metabo_info.php?molid=203628
203666	495.266	[M+Na]+	472.272	9	Pro Met Leu Ile	C22H40N4O5S			NO	metabo_info.php?molid=203666
203668	495.266	[M+Na]+	472.272	9	Pro Met Leu Leu	C22H40N4O5S			NO	metabo_info.php?molid=203668
106514	495.266	[M+Na]+	472.276	2	Ala Ile Asn Arg	C19H36N8O6			NO	metabo_info.php?molid=106514
106571	495.266	[M+Na]+	472.276	2	Ala Ile Arg Asn	C19H36N8O6			NO	metabo_info.php?molid=106571
107314	495.266	[M+Na]+	472.276	2	Ala Leu Asn Arg	C19H36N8O6			NO	metabo_info.php?molid=107314
107371	495.266	[M+Na]+	472.276	2	Ala Leu Arg Asn	C19H36N8O6			NO	metabo_info.php?molid=107371
108034	495.266	[M+Na]+	472.276	2	Ala Asn Ile Arg	C19H36N8O6			NO	metabo_info.php?molid=108034
108074	495.266	[M+Na]+	472.276	2	Ala Asn Leu Arg	C19H36N8O6			NO	metabo_info.php?molid=108074
108167	495.266	[M+Na]+	472.276	2	Ala Asn Arg Ile	C19H36N8O6			NO	metabo_info.php?molid=108167
[truncated: 320 more rows]
